# Supplementary material for: A prebiotic diet changes neural correlates of food decision-making in overweight adults: a randomized controlled within-subject cross-over trial
Source: bioRxiv or medRxiv preprint supplement (doi:10.1101/2023.05.30.23290707), 2023-06-03
Supplement: Supplementary file [file media-4.pdf]

## Correlations

| Spearman's rho          | interaction_VTA_change | interaction_rVTA_change | interaction_rOF_C_change | interaction_rmOFC_change | sumscore_GIQ_LI_change | Stool_frequency_change | STGHRE_chan |
|-------------------------|------------------------|-------------------------|--------------------------|--------------------------|------------------------|------------------------|-------------|
| Correlation Coefficient | 1,000                  | ,344                    | ,414                     | -,162                    | -,159                  | ,043                   |             |
| Sig. (2-tailed)         | .                      | ,028                    | ,005                     | ,299                     | ,316                   | ,793                   |             |
| N                       | 44                     | 41                      | 44                       | 43                       | 42                     | 40                     |             |
| Correlation Coefficient | ,344                   | 1,000                   | ,410                     | -,295                    | ,014                   | ,070                   |             |
| Sig. (2-tailed)         | ,028                   | .                       | ,008                     | ,065                     | ,934                   | ,681                   |             |
| N                       | 41                     | 41                      | 41                       | 40                       | 39                     | 37                     |             |
| Correlation Coefficient | ,414                   | ,410                    | 1,000                    | ,010                     | ,027                   | ,253                   |             |
| Sig. (2-tailed)         | ,005                   | ,008                    | .                        | ,947                     | ,683                   | ,116                   |             |
| N                       | 44                     | 41                      | 44                       | 43                       | 44                     | 40                     |             |
| Correlation Coefficient | -,162                  | -,295                   | ,010                     | 1,000                    | ,063                   | ,054                   |             |
| Sig. (2-tailed)         | ,299                   | ,065                    | ,947                     | .                        | ,683                   | ,738                   |             |
| N                       | 43                     | 40                      | 43                       | 45                       | 44                     | 41                     |             |
| Correlation Coefficient | -,159                  | ,014                    | ,027                     | ,063                     | 1,000                  | -,082                  |             |
| Sig. (2-tailed)         | ,316                   | ,934                    | ,867                     | ,683                     | .                      | ,615                   |             |
| N                       | 42                     | 39                      | 42                       | 44                       | 44                     | 40                     |             |
| Correlation Coefficient | ,043                   | ,070                    | ,253                     | ,054                     | -,082                  | 1,000                  |             |
| Sig. (2-tailed)         | ,793                   | ,681                    | ,116                     | ,738                     | ,615                   | .                      |             |
| N                       | 40                     | 37                      | 40                       | 41                       | 40                     | 42                     |             |
| Correlation Coefficient | ,439                   | ,348                    | ,318                     | -,159                    | -,047                  | ,011                   |             |
| Sig. (2-tailed)         | ,005                   | ,035                    | ,046                     | ,321                     | ,774                   | ,947                   |             |
| N                       | 40                     | 37                      | 40                       | 41                       | 40                     | 42                     |             |
| Correlation Coefficient | ,057                   | ,192                    | -,012                    | ,117                     | ,011                   | -,193                  |             |
| Sig. (2-tailed)         | ,727                   | ,254                    | ,943                     | ,468                     | ,946                   | ,221                   |             |
| N                       | 40                     | 37                      | 40                       | 41                       | 40                     | 42                     |             |

## Correlations

|                |                          | STPYY_change            | STGLPT_chan<br>ge | age   | BMI   | FM_stand | Richness | shannon.<br>effective |       |
|----------------|--------------------------|-------------------------|-------------------|-------|-------|----------|----------|-----------------------|-------|
| Spearman's rho | interaction_VTA_change   | Correlation Coefficient | ,439              | ,057  | -,028 | -,251    | ,104     | ,182                  | ,160  |
|                |                          | Sig. (2-tailed)         | ,005              | ,727  | ,854  | ,100     | ,500     | ,237                  | ,299  |
|                |                          | N                       | 40                | 40    | 44    | 44       | 44       | 44                    | 44    |
|                | interaction_rOFC_change  | Correlation Coefficient | ,348              | ,192  | ,385  | -,273    | -,088    | ,041                  | ,020  |
|                |                          | Sig. (2-tailed)         | ,035              | ,254  | ,013  | ,084     | ,585     | ,797                  | ,901  |
|                |                          | N                       | 37                | 37    | 41    | 41       | 41       | 41                    | 41    |
|                | interaction_rmOFC_change | Correlation Coefficient | ,318              | -,012 | ,167  | -,174    | -,031    | -,116                 | -,125 |
|                |                          | Sig. (2-tailed)         | ,046              | ,943  | ,279  | ,259     | ,839     | ,453                  | ,418  |
|                |                          | N                       | 40                | 40    | 44    | 44       | 44       | 44                    | 44    |
|                | sumscore_GIQLI_change    | Correlation Coefficient | -,159             | ,117  | ,175  | ,155     | ,154     | ,181                  | ,181  |
|                |                          | Sig. (2-tailed)         | ,321              | ,468  | ,251  | ,309     | ,312     | ,235                  | ,234  |
|                |                          | N                       | 41                | 41    | 45    | 45       | 45       | 45                    | 45    |
|                | Stool_frequency_change   | Correlation Coefficient | -,047             | ,011  | -,127 | -,034    | -,242    | -,278                 | -,259 |
|                |                          | Sig. (2-tailed)         | ,774              | ,946  | ,410  | ,829     | ,114     | ,067                  | ,090  |
|                |                          | N                       | 40                | 40    | 44    | 44       | 44       | 44                    | 44    |
|                | STGHRE_change            | Correlation Coefficient | ,011              | -,193 | -,051 | -,174    | -,351    | -,072                 | -,072 |
|                |                          | Sig. (2-tailed)         | ,947              | ,221  | ,748  | ,270     | ,023     | ,652                  | ,652  |
|                |                          | N                       | 42                | 42    | 42    | 42       | 42       | 42                    | 42    |
|                | STPYY_change             | Correlation Coefficient | 1,000             | ,113  | -,020 | -,078    | ,124     | ,137                  | ,141  |
|                |                          | Sig. (2-tailed)         | .                 | ,478  | ,902  | ,625     | ,433     | ,388                  | ,374  |
|                |                          | N                       | 42                | 42    | 42    | 42       | 42       | 42                    | 42    |
|                | STGLPT_change            | Correlation Coefficient | ,113              | 1,000 | -,094 | ,131     | ,150     | ,127                  | ,044  |
|                |                          | Sig. (2-tailed)         | ,478              | .     | ,556  | ,408     | ,344     | ,423                  | ,780  |
|                |                          | N                       | 42                | 42    | 42    | 42       | 42       | 42                    | 42    |

## Correlations

| Spearman's rho | interaction_VTA_change   | Correlation Coefficient | simpson.<br>effective | Evenness | CHOL_change | LDL_change | shannon.<br>effective | Richness_chan<br>ge |
|----------------|--------------------------|-------------------------|-----------------------|----------|-------------|------------|-----------------------|---------------------|
|                |                          | Correlation Coefficient | ,081                  | -,185    | -,066       | -,080      | ,241                  | ,154                |
|                |                          | Sig. (2-tailed)         | ,603                  | ,229     | ,669        | ,607       | ,120                  | ,323                |
|                |                          | N                       | 44                    | 44       | 44          | 44         | 43                    | 43                  |
|                | interaction_rOFC_change  | Correlation Coefficient | -,039                 | -,136    | ,041        | ,057       | -,253                 | -,211               |
|                |                          | Sig. (2-tailed)         | ,811                  | ,398     | ,800        | ,721       | ,115                  | ,191                |
|                |                          | N                       | 41                    | 41       | 41          | 41         | 40                    | 40                  |
|                | interaction_rmOFC_change | Correlation Coefficient | -,130                 | -,124    | -,086       | -,199      | -,154                 | -,177               |
|                |                          | Sig. (2-tailed)         | ,400                  | ,422     | ,578        | ,196       | ,324                  | ,256                |
|                |                          | N                       | 44                    | 44       | 44          | 44         | 43                    | 43                  |
|                | sumscore_GIQLI_change    | Correlation Coefficient | ,253                  | ,071     | -,157       | -,079      | ,154                  | ,122                |
|                |                          | Sig. (2-tailed)         | ,094                  | ,644     | ,304        | ,608       | ,319                  | ,431                |
|                |                          | N                       | 45                    | 45       | 45          | 45         | 44                    | 44                  |
|                | Stool_frequency_change   | Correlation Coefficient | -,216                 | ,040     | -,200       | -,075      | -,270                 | -,326               |
|                |                          | Sig. (2-tailed)         | ,159                  | ,797     | ,194        | ,631       | ,080                  | ,033                |
|                |                          | N                       | 44                    | 44       | 44          | 44         | 43                    | 43                  |
|                | STGHRE_change            | Correlation Coefficient | -,017                 | -,022    | -,506       | -,532      | ,007                  | -,070               |
|                |                          | Sig. (2-tailed)         | ,914                  | ,889     | ,001        | ,000       | ,964                  | ,659                |
|                |                          | N                       | 42                    | 42       | 42          | 42         | 42                    | 42                  |
|                | STPYY_change             | Correlation Coefficient | ,090                  | -,060    | ,083        | ,080       | -,089                 | -,204               |
|                |                          | Sig. (2-tailed)         | ,570                  | ,706     | ,600        | ,615       | ,575                  | ,196                |
|                |                          | N                       | 42                    | 42       | 42          | 42         | 42                    | 42                  |
|                | STGLPT_change            | Correlation Coefficient | -,017                 | -,131    | ,230        | ,233       | ,014                  | -,014               |
|                |                          | Sig. (2-tailed)         | ,917                  | ,408     | ,143        | ,137       | ,928                  | ,931                |
|                |                          | N                       | 42                    | 42       | 42          | 42         | 42                    | 42                  |

## Correlations

|                | Evenness_chan<br>ge      | Actinomyces_c<br>hange                     | Aerostipes_cha<br>nge | Bifidobacterium<br>_change | Blautia_change | Collinsella_cha<br>nge |               |               |
|----------------|--------------------------|--------------------------------------------|-----------------------|----------------------------|----------------|------------------------|---------------|---------------|
| Spearman's rho | interaction_VTA_change   | Correlation Coefficient<br>Sig. (2-tailed) | ,112<br>,473          | -,042<br>,791              | -,264<br>,088  | -,152<br>,332          | -,238<br>,124 | ,024<br>,878  |
|                |                          | N                                          | 43                    | 43                         | 43             | 43                     | 43            | 43            |
|                | interaction_rOFC_change  | Correlation Coefficient<br>Sig. (2-tailed) | -,227<br>,159         | ,268<br>,094               | -,206<br>,201  | -,136<br>,401          | ,179<br>,270  | ,178<br>,271  |
|                |                          | N                                          | 40                    | 40                         | 40             | 40                     | 40            | 40            |
|                | interaction_rmOFC_change | Correlation Coefficient<br>Sig. (2-tailed) | -,045<br>,772         | ,173<br>,268               | ,039<br>,806   | ,098<br>,533           | ,084<br>,594  | ,150<br>,339  |
|                |                          | N                                          | 43                    | 43                         | 43             | 43                     | 43            | 43            |
|                | sumscore_GIQLI_change    | Correlation Coefficient<br>Sig. (2-tailed) | ,171<br>,266          | -,130<br>,401              | ,021<br>,892   | -,109<br>,482          | ,166<br>,283  | -,202<br>,189 |
|                |                          | N                                          | 44                    | 44                         | 44             | 44                     | 44            | 44            |
|                | Stool_frequency_change   | Correlation Coefficient<br>Sig. (2-tailed) | ,106<br>,498          | -,006<br>,972              | ,325<br>,034   | -,125<br>,425          | ,115<br>,465  | ,151<br>,333  |
|                |                          | N                                          | 43                    | 43                         | 43             | 43                     | 43            | 43            |
|                | STGHRE_change            | Correlation Coefficient<br>Sig. (2-tailed) | ,124<br>,433          | ,008<br>,958               | -,040<br>,803  | -,225<br>,151          | ,163<br>,301  | ,014<br>,930  |
|                |                          | N                                          | 42                    | 42                         | 42             | 42                     | 42            | 42            |
|                | STPYY_change             | Correlation Coefficient<br>Sig. (2-tailed) | ,122<br>,442          | ,084<br>,599               | ,001<br>,995   | ,012<br>,940           | -,021<br>,894 | ,176<br>,266  |
|                |                          | N                                          | 42                    | 42                         | 42             | 42                     | 42            | 42            |
|                | STGLPT_change            | Correlation Coefficient<br>Sig. (2-tailed) | ,073<br>,644          | -,030<br>,852              | ,067<br>,673   | ,014<br>,929           | ,209<br>,184  | ,004<br>,978  |
|                |                          | N                                          | 42                    | 42                         | 42             | 42                     | 42            | 42            |

## Correlations

| Spearman's rho | interaction_VTA_change   | Desulfovibrio_c<br>hange | Eggerthella_ch<br>ange | Erysipelatoclost<br>ridium_change | Faecalitalea_ch<br>ange | Family.XIII.<br>AD3011.<br>group_change | Family.XIII.<br>UCG.<br>001_change |
|----------------|--------------------------|--------------------------|------------------------|-----------------------------------|-------------------------|-----------------------------------------|------------------------------------|
|                | Correlation Coefficient  | ,034                     | ,020                   | ,159                              | -,099                   | ,121                                    | -,080                              |
|                | Sig. (2-tailed)          | ,830                     | ,899                   | ,309                              | ,526                    | ,440                                    | ,611                               |
|                | N                        | 43                       | 43                     | 43                                | 43                      | 43                                      | 43                                 |
|                | interaction_rOFC_change  | -,009                    | ,022                   | -,021                             | -,018                   | ,191                                    | ,064                               |
|                | Correlation Coefficient  | ,955                     | ,892                   | ,900                              | ,911                    | ,238                                    | ,696                               |
|                | Sig. (2-tailed)          | 40                       | 40                     | 40                                | 40                      | 40                                      | 40                                 |
|                | N                        | -,084                    | -,027                  | -,063                             | ,035                    | ,070                                    | -,206                              |
|                | interaction_rmOFC_change | ,591                     | ,862                   | ,688                              | ,825                    | ,655                                    | ,185                               |
|                | Correlation Coefficient  | 43                       | 43                     | 43                                | 43                      | 43                                      | 43                                 |
|                | Sig. (2-tailed)          | ,059                     | ,104                   | ,190                              | ,038                    | ,180                                    | ,009                               |
|                | N                        | ,704                     | ,503                   | ,216                              | ,809                    | ,241                                    | ,953                               |
|                | sumscore_GIQLI_change    | 44                       | 44                     | 44                                | 44                      | 44                                      | 44                                 |
|                | Correlation Coefficient  | ,066                     | -,131                  | -,291                             | -,040                   | ,250                                    | -,054                              |
|                | Sig. (2-tailed)          | ,674                     | ,403                   | ,058                              | ,798                    | ,105                                    | ,731                               |
|                | N                        | 43                       | 43                     | 43                                | 43                      | 43                                      | 43                                 |
|                | Stool_frequency_change   | -,095                    | -,126                  | -,075                             | ,166                    | ,125                                    | ,215                               |
|                | Correlation Coefficient  | ,551                     | ,425                   | ,639                              | ,294                    | ,430                                    | ,171                               |
|                | Sig. (2-tailed)          | 42                       | 42                     | 42                                | 42                      | 42                                      | 42                                 |
|                | N                        | -,370                    | ,032                   | -,017                             | ,011                    | ,171                                    | ,017                               |
|                | STPHY_change             | ,016                     | ,839                   | ,913                              | ,945                    | ,279                                    | ,913                               |
|                | Correlation Coefficient  | 42                       | 42                     | 42                                | 42                      | 42                                      | 42                                 |
|                | Sig. (2-tailed)          | -,069                    | ,103                   | ,296                              | ,090                    | ,058                                    | ,205                               |
|                | N                        | ,666                     | ,518                   | ,057                              | ,570                    | ,717                                    | ,192                               |
|                | STGLPT_change            | 42                       | 42                     | 42                                | 42                      | 42                                      | 42                                 |
|                | Correlation Coefficient  |                          |                        |                                   |                         |                                         |                                    |
|                | Sig. (2-tailed)          |                          |                        |                                   |                         |                                         |                                    |
|                | N                        |                          |                        |                                   |                         |                                         |                                    |

## Correlations

|                | Gemella_chang<br>e       | Gordombacter_<br>change                    | Holdemania_<br>change | Holdemania_ch<br>ange | Lachnospiracea<br>e.FCS020.<br>group_change | Lachnospiracea<br>e.NK4A136.<br>group_change |
|----------------|--------------------------|--------------------------------------------|-----------------------|-----------------------|---------------------------------------------|----------------------------------------------|
| Spearman's rho | interaction_VTA_change   | Correlation Coefficient<br>Sig. (2-tailed) | -.174<br>,025         | -.083<br>,116         | -.041<br>,792                               | ,286<br>,063                                 |
|                |                          | N                                          | 43                    | 43                    | 43                                          | 43                                           |
|                | interaction_rOFC_change  | Correlation Coefficient<br>Sig. (2-tailed) | ,295<br>,044          | ,049<br>,259          | -.079<br>,627                               | -.093<br>,566                                |
|                |                          | N                                          | 40                    | 40                    | 40                                          | 40                                           |
|                | interaction_rmOFC_change | Correlation Coefficient<br>Sig. (2-tailed) | ,196<br>,079          | ,005<br>,195          | ,028<br>,860                                | -.001<br>,996                                |
|                |                          | N                                          | 43                    | 43                    | 43                                          | 43                                           |
|                | sumscore_GIQLI_change    | Correlation Coefficient<br>Sig. (2-tailed) | ,086<br>,610          | ,160<br>,301          | ,133<br>,390                                | ,000<br>,998                                 |
|                |                          | N                                          | 44                    | 44                    | 44                                          | 44                                           |
|                | Stool_frequency_change   | Correlation Coefficient<br>Sig. (2-tailed) | -.119<br>,445         | -.104<br>,505         | -.071<br>,649                               | -.013<br>,933                                |
|                |                          | N                                          | 43                    | 43                    | 43                                          | 43                                           |
|                | STGHRE_change            | Correlation Coefficient<br>Sig. (2-tailed) | -.105<br>,510         | -.104<br>,514         | -.078<br>,624                               | ,094<br>,554                                 |
|                |                          | N                                          | 42                    | 42                    | 42                                          | 42                                           |
|                | STPYY_change             | Correlation Coefficient<br>Sig. (2-tailed) | -.139<br>,381         | -.043<br>,785         | ,076<br>,633                                | ,155<br>,326                                 |
|                |                          | N                                          | 42                    | 42                    | 42                                          | 42                                           |
|                | STGLPT_change            | Correlation Coefficient<br>Sig. (2-tailed) | ,150<br>,342          | ,166<br>,294          | ,162<br>,307                                | -.079<br>,621                                |
|                |                          | N                                          | 42                    | 42                    | 42                                          | 42                                           |

## Correlations

|                |                          | Lactiplantibacillus_change | Lactobacillus_change | Libanicoccus_change | Ligilactobacillus_change | Limosilactobacillus_change | Roseburia_change |
|----------------|--------------------------|----------------------------|----------------------|---------------------|--------------------------|----------------------------|------------------|
| Spearman's rho | interaction_VTA_change   | Correlation Coefficient    | -.023                | ,294                | -,175                    | -,010                      | ,137             |
|                |                          | Sig. (2-tailed)            | ,882                 | ,056                | ,262                     | ,949                       | ,380             |
|                |                          | N                          | 43                   | 43                  | 43                       | 43                         | 43               |
|                | interaction_rOFC_change  | Correlation Coefficient    | ,046                 | ,211                | -,105                    | -,005                      | ,146             |
|                |                          | Sig. (2-tailed)            | ,778                 | ,192                | ,521                     | ,976                       | ,369             |
|                |                          | N                          | 40                   | 40                  | 40                       | 40                         | 40               |
|                | interaction_rmOFC_change | Correlation Coefficient    | -,054                | ,223                | -,082                    | -,070                      | -,011            |
|                |                          | Sig. (2-tailed)            | ,731                 | ,151                | ,603                     | ,654                       | ,944             |
|                |                          | N                          | 43                   | 43                  | 43                       | 43                         | 43               |
|                | sumscore_GIQLI_change    | Correlation Coefficient    | -,033                | -,057               | ,054                     | ,058                       | ,025             |
|                |                          | Sig. (2-tailed)            | ,833                 | ,712                | ,727                     | ,706                       | ,870             |
|                |                          | N                          | 44                   | 44                  | 44                       | 44                         | 44               |
|                | Stool_frequency_change   | Correlation Coefficient    | ,105                 | -,187               | ,060                     | ,169                       | -,316            |
|                |                          | Sig. (2-tailed)            | ,504                 | ,230                | ,703                     | ,278                       | ,039             |
|                |                          | N                          | 43                   | 43                  | 43                       | 43                         | 43               |
|                | STGHRE_change            | Correlation Coefficient    | -,070                | -,107               | -,017                    | -,196                      | -,209            |
|                |                          | Sig. (2-tailed)            | ,659                 | ,499                | ,914                     | ,212                       | ,184             |
|                |                          | N                          | 42                   | 42                  | 42                       | 42                         | 42               |
|                | STPYY_change             | Correlation Coefficient    | ,046                 | ,039                | ,015                     | ,027                       | -,048            |
|                |                          | Sig. (2-tailed)            | ,771                 | ,807                | ,924                     | ,864                       | ,763             |
|                |                          | N                          | 42                   | 42                  | 42                       | 42                         | 42               |
|                | STGLPT_change            | Correlation Coefficient    | -,181                | ,115                | ,038                     | -,182                      | -,035            |
|                |                          | Sig. (2-tailed)            | ,251                 | ,468                | ,813                     | ,248                       | ,824             |
|                |                          | N                          | 42                   | 42                  | 42                       | 42                         | 42               |

## Correlations

|                | Shuttleworthia_<br>change | Subdoligranulu<br>m_change | UCG.<br>003_change | X.Eubacterium..<br>brachy.<br>group_change | X.<br>Ruminococcus.<br>.gavureauii.<br>group_change | X.<br>Ruminococcus.<br>.torques.<br>group_change |
|----------------|---------------------------|----------------------------|--------------------|--------------------------------------------|-----------------------------------------------------|--------------------------------------------------|
| Spearman's rho | interaction_VTA_change    | ,191                       | -,384              | ,185                                       | ,115                                                | -,194                                            |
|                |                           | Correlation Coefficient    |                    |                                            |                                                     |                                                  |
|                |                           | ,220                       | ,011               | ,236                                       | ,464                                                | ,211                                             |
|                |                           | Sig. (2-tailed)            |                    |                                            |                                                     |                                                  |
|                |                           | N                          | 43                 | 43                                         | 43                                                  | 43                                               |
|                | interaction_rOFC_change   | -,155                      | -,159              | ,122                                       | -,177                                               | -,143                                            |
|                |                           | Correlation Coefficient    |                    |                                            |                                                     |                                                  |
|                |                           | ,338                       | ,329               | ,453                                       | ,275                                                | ,377                                             |
|                |                           | Sig. (2-tailed)            |                    |                                            |                                                     |                                                  |
|                |                           | N                          | 40                 | 40                                         | 40                                                  | 40                                               |
|                | interaction_rmOFC_change  | ,032                       | -,015              | -,094                                      | ,038                                                | -,024                                            |
|                |                           | Correlation Coefficient    |                    |                                            |                                                     |                                                  |
|                |                           | ,838                       | ,922               | ,551                                       | ,809                                                | ,879                                             |
|                |                           | Sig. (2-tailed)            |                    |                                            |                                                     |                                                  |
|                |                           | N                          | 43                 | 43                                         | 43                                                  | 43                                               |
|                | sumscore_GIQLI_change     | ,210                       | ,261               | -,255                                      | ,090                                                | ,113                                             |
|                |                           | Correlation Coefficient    |                    |                                            |                                                     |                                                  |
|                |                           | ,172                       | ,087               | ,095                                       | ,561                                                | ,465                                             |
|                |                           | Sig. (2-tailed)            |                    |                                            |                                                     |                                                  |
|                |                           | N                          | 44                 | 44                                         | 44                                                  | 44                                               |
|                | Stool_frequency_change    | ,115                       | ,083               | -,067                                      | -,196                                               | -,091                                            |
|                |                           | Correlation Coefficient    |                    |                                            |                                                     |                                                  |
|                |                           | ,462                       | ,598               | ,669                                       | ,209                                                | ,560                                             |
|                |                           | Sig. (2-tailed)            |                    |                                            |                                                     |                                                  |
|                |                           | N                          | 43                 | 43                                         | 43                                                  | 43                                               |
|                | STGHRE_change             | -,164                      | ,279               | -,059                                      | -,097                                               | -,100                                            |
|                |                           | Correlation Coefficient    |                    |                                            |                                                     |                                                  |
|                |                           | ,300                       | ,073               | ,711                                       | ,540                                                | ,528                                             |
|                |                           | Sig. (2-tailed)            |                    |                                            |                                                     |                                                  |
|                |                           | N                          | 42                 | 42                                         | 42                                                  | 42                                               |
|                | STPYY_change              | -,068                      | -,210              | -,176                                      | -,061                                               | -,063                                            |
|                |                           | Correlation Coefficient    |                    |                                            |                                                     |                                                  |
|                |                           | ,669                       | ,182               | ,264                                       | ,702                                                | ,693                                             |
|                |                           | Sig. (2-tailed)            |                    |                                            |                                                     |                                                  |
|                |                           | N                          | 42                 | 42                                         | 42                                                  | 42                                               |
|                | STGLPT_change             | -,074                      | ,009               | -,165                                      | ,179                                                | -,159                                            |
|                |                           | Correlation Coefficient    |                    |                                            |                                                     |                                                  |
|                |                           | ,644                       | ,957               | ,296                                       | ,256                                                | ,314                                             |
|                |                           | Sig. (2-tailed)            |                    |                                            |                                                     |                                                  |
|                |                           | N                          | 42                 | 42                                         | 42                                                  | 42                                               |



## Correlations

|                   | interaction_VTA<br>_change                      | interaction_rOF<br>C_change | interaction_rmO<br>FC_change | sumscore_GIQ<br>LI_change | Stool_frequenc<br>y_change | STGHRE_chan<br>ge   |
|-------------------|-------------------------------------------------|-----------------------------|------------------------------|---------------------------|----------------------------|---------------------|
| age               | Correlation Coefficient<br>Sig. (2-tailed)<br>N | -,028<br>,854<br>44         | ,385<br>,013<br>41           | ,167<br>,279<br>44        | ,175<br>,251<br>45         | -,127<br>,410<br>44 |
| BMI               | Correlation Coefficient<br>Sig. (2-tailed)<br>N | -,251<br>,100<br>44         | -,273<br>,084<br>41          | -,174<br>,259<br>44       | ,155<br>,309<br>45         | -,034<br>,829<br>44 |
| FM_stand          | Correlation Coefficient<br>Sig. (2-tailed)<br>N | ,104<br>,500<br>44          | -,088<br>,585<br>41          | -,031<br>,839<br>44       | ,154<br>,312<br>45         | -,242<br>,114<br>44 |
| Richness          | Correlation Coefficient<br>Sig. (2-tailed)<br>N | ,182<br>,237<br>44          | ,041<br>,797<br>41           | -,116<br>,453<br>44       | ,181<br>,235<br>45         | -,278<br>,067<br>44 |
| shannon.effective | Correlation Coefficient<br>Sig. (2-tailed)<br>N | ,160<br>,299<br>44          | ,020<br>,901<br>41           | -,125<br>,418<br>44       | ,181<br>,234<br>45         | -,259<br>,090<br>44 |
| simpson.effective | Correlation Coefficient<br>Sig. (2-tailed)<br>N | ,081<br>,603<br>44          | -,039<br>,811<br>41          | -,130<br>,400<br>44       | ,253<br>,094<br>45         | -,216<br>,159<br>44 |
| Evenness          | Correlation Coefficient<br>Sig. (2-tailed)<br>N | -,185<br>,229<br>44         | -,136<br>,398<br>41          | -,124<br>,422<br>44       | ,071<br>,644<br>45         | ,040<br>,797<br>44  |
| CHOL_change       | Correlation Coefficient<br>Sig. (2-tailed)<br>N | -,066<br>,669<br>44         | ,041<br>,800<br>41           | -,086<br>,578<br>44       | -,157<br>,304<br>45        | -,200<br>,194<br>44 |

## Correlations

|                   | STPYY_change                                    | STGLPT_chan<br>ge   | age                 | BMI                 | FM_stand            | Richness           | shannon.<br>effective |
|-------------------|-------------------------------------------------|---------------------|---------------------|---------------------|---------------------|--------------------|-----------------------|
| age               | Correlation Coefficient<br>Sig. (2-tailed)<br>N | -.094<br>,556<br>42 | 1,000<br>.<br>46    | -.041<br>,789<br>46 | -.055<br>,718<br>46 | ,126<br>,402<br>46 | ,065<br>,670<br>46    |
| BMI               | Correlation Coefficient<br>Sig. (2-tailed)<br>N | -.078<br>,625<br>42 | -.041<br>,789<br>46 | 1,000<br>.<br>46    | ,463<br>,001<br>46  | ,163<br>,278<br>46 | ,111<br>,463<br>46    |
| FM_stand          | Correlation Coefficient<br>Sig. (2-tailed)<br>N | ,124<br>,433<br>42  | -.055<br>,718<br>46 | ,463<br>,001<br>46  | 1,000<br>.<br>46    | ,030<br>,842<br>46 | -.027<br>,856<br>46   |
| Richness          | Correlation Coefficient<br>Sig. (2-tailed)<br>N | ,137<br>,388<br>42  | ,126<br>,402<br>46  | ,163<br>,278<br>46  | ,030<br>,842<br>46  | 1,000<br>.<br>46   | ,949<br>,000<br>46    |
| shannon.effective | Correlation Coefficient<br>Sig. (2-tailed)<br>N | ,141<br>,374<br>42  | ,065<br>,670<br>46  | ,111<br>,463<br>46  | -.027<br>,856<br>46 | ,949<br>,000<br>46 | 1,000<br>.<br>46      |
| simpson.effective | Correlation Coefficient<br>Sig. (2-tailed)<br>N | ,090<br>,570<br>42  | ,058<br>,702<br>46  | ,068<br>,654<br>46  | -.071<br>,639<br>46 | ,886<br>,000<br>46 | ,965<br>,000<br>46    |
| Evenness          | Correlation Coefficient<br>Sig. (2-tailed)<br>N | -.060<br>,706<br>42 | -.096<br>,524<br>46 | -.029<br>,850<br>46 | -.094<br>,536<br>46 | ,153<br>,310<br>46 | ,405<br>,005<br>46    |
| CHOL_change       | Correlation Coefficient<br>Sig. (2-tailed)<br>N | ,083<br>,600<br>42  | ,077<br>,611<br>46  | ,238<br>,111<br>46  | ,513<br>,000<br>46  | ,010<br>,948<br>46 | -.067<br>,658<br>46   |

## Correlations

|                   |                         | simpson.<br>effective | Evenness | CHOL_change | LDL_change | shannon.<br>effective | Richness_chan<br>ge |
|-------------------|-------------------------|-----------------------|----------|-------------|------------|-----------------------|---------------------|
| age               | Correlation Coefficient | ,058                  | -,096    | ,077        | ,052       | -,019                 | ,089                |
|                   | Sig. (2-tailed)         | ,702                  | ,524     | ,611        | ,733       | ,903                  | ,559                |
|                   | N                       | 46                    | 46       | 46          | 46         | 45                    | 45                  |
| BMI               | Correlation Coefficient | ,068                  | -,029    | ,238        | ,202       | -,130                 | -,105               |
|                   | Sig. (2-tailed)         | ,654                  | ,850     | ,111        | ,179       | ,395                  | ,492                |
|                   | N                       | 46                    | 46       | 46          | 46         | 45                    | 45                  |
| FM_stand          | Correlation Coefficient | -,071                 | -,094    | ,513        | ,478       | ,014                  | ,167                |
|                   | Sig. (2-tailed)         | ,639                  | ,536     | ,000        | ,001       | ,927                  | ,274                |
|                   | N                       | 46                    | 46       | 46          | 46         | 45                    | 45                  |
| Richness          | Correlation Coefficient | ,886                  | ,153     | ,010        | -,042      | ,490                  | ,500                |
|                   | Sig. (2-tailed)         | ,000                  | ,310     | ,948        | ,781       | ,001                  | ,000                |
|                   | N                       | 46                    | 46       | 46          | 46         | 45                    | 45                  |
| shannon.effective | Correlation Coefficient | ,965                  | ,405     | -,067       | -,119      | ,570                  | ,512                |
|                   | Sig. (2-tailed)         | ,000                  | ,005     | ,658        | ,430       | ,000                  | ,000                |
|                   | N                       | 46                    | 46       | 46          | 46         | 45                    | 45                  |
| simpson.effective | Correlation Coefficient | 1,000                 | ,491     | -,114       | -,149      | ,586                  | ,500                |
|                   | Sig. (2-tailed)         | .                     | ,001     | ,449        | ,322       | ,000                  | ,000                |
|                   | N                       | 46                    | 46       | 46          | 46         | 45                    | 45                  |
| Evenness          | Correlation Coefficient | ,491                  | 1,000    | -,053       | -,082      | ,347                  | ,163                |
|                   | Sig. (2-tailed)         | ,001                  | .        | ,726        | ,588       | ,020                  | ,285                |
|                   | N                       | 46                    | 46       | 46          | 46         | 45                    | 45                  |
| CHOL_change       | Correlation Coefficient | -,114                 | -,053    | 1,000       | ,926       | -,144                 | ,038                |
|                   | Sig. (2-tailed)         | ,449                  | ,726     | .           | ,000       | ,344                  | ,806                |
|                   | N                       | 46                    | 46       | 46          | 46         | 45                    | 45                  |

## Correlations

|                   | Evenness_chan<br>ge                             | Actinomyces_c<br>hange | Aerostipes_cha<br>nge | Bifidobacterium<br>_change | Blautia_change      | Collinsella_cha<br>nge |
|-------------------|-------------------------------------------------|------------------------|-----------------------|----------------------------|---------------------|------------------------|
| age               | Correlation Coefficient<br>Sig. (2-tailed)<br>N | -,205<br>,177<br>45    | -,004<br>,979<br>45   | -,078<br>,611<br>45        | -,044<br>,774<br>45 | -,228<br>,133<br>45    |
| BMI               | Correlation Coefficient<br>Sig. (2-tailed)<br>N | -,086<br>,575<br>45    | -,121<br>,429<br>45   | ,105<br>,491<br>45         | -,013<br>,933<br>45 | -,035<br>,820<br>45    |
| FM_stand          | Correlation Coefficient<br>Sig. (2-tailed)<br>N | -,303<br>,043<br>45    | ,085<br>,577<br>45    | -,157<br>,305<br>45        | -,323<br>,031<br>45 | ,013<br>,932<br>45     |
| Richness          | Correlation Coefficient<br>Sig. (2-tailed)<br>N | ,137<br>,370<br>45     | -,028<br>,856<br>45   | ,011<br>,943<br>45         | -,514<br>,000<br>45 | -,354<br>,017<br>45    |
| shannon.effective | Correlation Coefficient<br>Sig. (2-tailed)<br>N | ,306<br>,041<br>45     | -,017<br>,912<br>45   | ,036<br>,816<br>45         | -,582<br>,000<br>45 | -,322<br>,031<br>45    |
| simpson.effective | Correlation Coefficient<br>Sig. (2-tailed)<br>N | ,373<br>,012<br>45     | -,085<br>,577<br>45   | ,058<br>,703<br>45         | -,626<br>,000<br>45 | -,369<br>,012<br>45    |
| Evenness          | Correlation Coefficient<br>Sig. (2-tailed)<br>N | ,600<br>,000<br>45     | ,010<br>,949<br>45    | ,155<br>,309<br>45         | -,401<br>,006<br>45 | -,060<br>,697<br>45    |
| CHOL_change       | Correlation Coefficient<br>Sig. (2-tailed)<br>N | -,308<br>,039<br>45    | ,118<br>,441<br>45    | -,260<br>,084<br>45        | ,153<br>,316<br>45  | ,110<br>,474<br>45     |

## Correlations

|                   | Desulfovibrio_c<br>hange | Eggerthella_ch<br>ange | Erysipelatoclost<br>ridium_change | Faecalitalea_ch<br>ange | Family.XIII.<br>AD3011.<br>group_change | Family.XIII.<br>UCG.<br>001_change |
|-------------------|--------------------------|------------------------|-----------------------------------|-------------------------|-----------------------------------------|------------------------------------|
| age               | Correlation Coefficient  | ,135                   | ,151                              | ,005                    | -,041                                   | -,057                              |
|                   | Sig. (2-tailed)          | ,378                   | ,322                              | ,973                    | ,788                                    | ,711                               |
|                   | N                        | 45                     | 45                                | 45                      | 45                                      | 45                                 |
| BMI               | Correlation Coefficient  | -,268                  | ,107                              | ,250                    | ,041                                    | ,033                               |
|                   | Sig. (2-tailed)          | ,075                   | ,485                              | ,097                    | ,791                                    | ,831                               |
|                   | N                        | 45                     | 45                                | 45                      | 45                                      | 45                                 |
| FM_stand          | Correlation Coefficient  | -,284                  | ,228                              | ,207                    | ,055                                    | -,024                              |
|                   | Sig. (2-tailed)          | ,059                   | ,131                              | ,172                    | ,721                                    | ,876                               |
|                   | N                        | 45                     | 45                                | 45                      | 45                                      | 45                                 |
| Richness          | Correlation Coefficient  | -,048                  | ,118                              | ,120                    | ,011                                    | ,350                               |
|                   | Sig. (2-tailed)          | ,753                   | ,438                              | ,433                    | ,942                                    | ,018                               |
|                   | N                        | 45                     | 45                                | 45                      | 45                                      | 45                                 |
| shannon.effective | Correlation Coefficient  | -,048                  | ,104                              | ,112                    | ,026                                    | ,325                               |
|                   | Sig. (2-tailed)          | ,755                   | ,498                              | ,464                    | ,864                                    | ,029                               |
|                   | N                        | 45                     | 45                                | 45                      | 45                                      | 45                                 |
| simpson.effective | Correlation Coefficient  | -,059                  | ,084                              | ,126                    | ,041                                    | ,293                               |
|                   | Sig. (2-tailed)          | ,699                   | ,583                              | ,408                    | ,788                                    | ,051                               |
|                   | N                        | 45                     | 45                                | 45                      | 45                                      | 45                                 |
| Evenness          | Correlation Coefficient  | -,091                  | ,081                              | -,016                   | ,117                                    | ,022                               |
|                   | Sig. (2-tailed)          | ,553                   | ,595                              | ,919                    | ,443                                    | ,885                               |
|                   | N                        | 45                     | 45                                | 45                      | 45                                      | 45                                 |
| CHOL_change       | Correlation Coefficient  | -,270                  | ,203                              | ,152                    | -,149                                   | -,174                              |
|                   | Sig. (2-tailed)          | ,073                   | ,181                              | ,318                    | ,328                                    | ,253                               |
|                   | N                        | 45                     | 45                                | 45                      | 45                                      | 45                                 |

## Correlations

|                   | Gemella_chang<br>e      | Gordombacter_<br>change | Holdemania_<br>change | Holdemania_ch<br>ange | Lachnospiracea<br>e.FCS020.<br>group_change | Lachnospiracea<br>e.NK4A136.<br>group_change |
|-------------------|-------------------------|-------------------------|-----------------------|-----------------------|---------------------------------------------|----------------------------------------------|
| age               | Correlation Coefficient | ,200                    | -,098                 | ,177                  | -,187                                       | ,152                                         |
|                   | Sig. (2-tailed)         | ,187                    | ,523                  | ,245                  | ,220                                        | ,319                                         |
|                   | N                       | 45                      | 45                    | 45                    | 45                                          | 45                                           |
| BMI               | Correlation Coefficient | -,204                   | ,079                  | ,284                  | ,056                                        | ,109                                         |
|                   | Sig. (2-tailed)         | ,180                    | ,606                  | ,058                  | ,713                                        | ,476                                         |
|                   | N                       | 45                      | 45                    | 45                    | 45                                          | 45                                           |
| FM_stand          | Correlation Coefficient | -,199                   | ,056                  | ,017                  | -,044                                       | ,114                                         |
|                   | Sig. (2-tailed)         | ,189                    | ,713                  | ,911                  | ,774                                        | ,454                                         |
|                   | N                       | 45                      | 45                    | 45                    | 45                                          | 45                                           |
| Richness          | Correlation Coefficient | -,070                   | ,303                  | ,395                  | ,238                                        | ,177                                         |
|                   | Sig. (2-tailed)         | ,648                    | ,043                  | ,007                  | ,115                                        | ,246                                         |
|                   | N                       | 45                      | 45                    | 45                    | 45                                          | 45                                           |
| shannon.effective | Correlation Coefficient | -,050                   | ,318                  | ,414                  | ,193                                        | ,117                                         |
|                   | Sig. (2-tailed)         | ,745                    | ,033                  | ,005                  | ,204                                        | ,443                                         |
|                   | N                       | 45                      | 45                    | 45                    | 45                                          | 45                                           |
| simpson.effective | Correlation Coefficient | -,066                   | ,357                  | ,438                  | ,205                                        | ,108                                         |
|                   | Sig. (2-tailed)         | ,667                    | ,016                  | ,003                  | ,178                                        | ,480                                         |
|                   | N                       | 45                      | 45                    | 45                    | 45                                          | 45                                           |
| Evenness          | Correlation Coefficient | -,034                   | ,092                  | ,206                  | -,019                                       | -,153                                        |
|                   | Sig. (2-tailed)         | ,824                    | ,546                  | ,175                  | ,903                                        | ,316                                         |
|                   | N                       | 45                      | 45                    | 45                    | 45                                          | 45                                           |
| CHOL_change       | Correlation Coefficient | ,155                    | ,137                  | -,201                 | ,182                                        | ,013                                         |
|                   | Sig. (2-tailed)         | ,311                    | ,369                  | ,186                  | ,232                                        | ,933                                         |
|                   | N                       | 45                      | 45                    | 45                    | 45                                          | 45                                           |

## Correlations

|                   | Lactiplantibacillus_change                      | Lactobacillus_change | Libanicoccus_change | Ligilactobacillus_change | Limosilactobacillus_change | Roseburia_change    |
|-------------------|-------------------------------------------------|----------------------|---------------------|--------------------------|----------------------------|---------------------|
| age               | Correlation Coefficient<br>Sig. (2-tailed)<br>N | -,003<br>,190<br>45  | ,250<br>,098<br>45  | -,220<br>,146<br>45      | ,280<br>,062<br>45         | ,323<br>,030<br>45  |
| BMI               | Correlation Coefficient<br>Sig. (2-tailed)<br>N | -,024<br>,874<br>45  | ,042<br>,786<br>45  | ,072<br>,637<br>45       | -,257<br>,088<br>45        | -,120<br>,434<br>45 |
| FM_stand          | Correlation Coefficient<br>Sig. (2-tailed)<br>N | ,182<br>,231<br>45   | -,048<br>,753<br>45 | -,144<br>,345<br>45      | -,212<br>,162<br>45        | ,182<br>,232<br>45  |
| Richness          | Correlation Coefficient<br>Sig. (2-tailed)<br>N | -,214<br>,159<br>45  | ,110<br>,470<br>45  | -,045<br>,768<br>45      | -,141<br>,354<br>45        | ,123<br>,419<br>45  |
| shannon.effective | Correlation Coefficient<br>Sig. (2-tailed)<br>N | -,256<br>,090<br>45  | ,108<br>,481<br>45  | ,004<br>,979<br>45       | -,098<br>,523<br>45        | ,096<br>,532<br>45  |
| simpson.effective | Correlation Coefficient<br>Sig. (2-tailed)<br>N | -,284<br>,059<br>45  | ,007<br>,963<br>45  | ,017<br>,914<br>45       | -,108<br>,480<br>45        | ,054<br>,726<br>45  |
| Evenness          | Correlation Coefficient<br>Sig. (2-tailed)<br>N | -,172<br>,258<br>45  | -,031<br>,837<br>45 | ,145<br>,342<br>45       | ,031<br>,839<br>45         | -,126<br>,409<br>45 |
| CHOL_change       | Correlation Coefficient<br>Sig. (2-tailed)<br>N | -,052<br>,735<br>45  | -,032<br>,834<br>45 | -,061<br>,689<br>45      | -,076<br>,622<br>45        | ,028<br>,857<br>45  |

## Correlations

|                   | Shuttleworthia_<br>change                       | Subdoligranulu<br>m_change | UCG.<br>003_change  | Xi.Eubacterium..<br>brachy.<br>group_change | X.<br>Ruminococcus.<br>.gavvreauii.<br>group_change | X.<br>Ruminococcus.<br>.torques.<br>group_change |
|-------------------|-------------------------------------------------|----------------------------|---------------------|---------------------------------------------|-----------------------------------------------------|--------------------------------------------------|
| age               | Correlation Coefficient<br>Sig. (2-tailed)<br>N | -,034<br>,825<br>45        | -,033<br>,827<br>45 | ,072<br>,638<br>45                          | -,090<br>,554<br>45                                 | ,071<br>,642<br>45                               |
| BMI               | Correlation Coefficient<br>Sig. (2-tailed)<br>N | ,016<br>,915<br>45         | ,175<br>,252<br>45  | ,239<br>,113<br>45                          | -,048<br>,753<br>45                                 | -,050<br>,744<br>45                              |
| FM_stand          | Correlation Coefficient<br>Sig. (2-tailed)<br>N | ,312<br>,037<br>45         | -,188<br>,216<br>45 | ,208<br>,170<br>45                          | ,150<br>,324<br>45                                  | ,196<br>,196<br>45                               |
| Richness          | Correlation Coefficient<br>Sig. (2-tailed)<br>N | -,034<br>,826<br>45        | -,033<br>,831<br>45 | ,052<br>,736<br>45                          | ,244<br>,106<br>45                                  | -,346<br>,020<br>45                              |
| shannon.effective | Correlation Coefficient<br>Sig. (2-tailed)<br>N | -,090<br>,556<br>45        | ,008<br>,956<br>45  | ,083<br>,587<br>45                          | ,227<br>,133<br>45                                  | -,288<br>,055<br>45                              |
| simpson.effective | Correlation Coefficient<br>Sig. (2-tailed)<br>N | -,080<br>,603<br>45        | ,101<br>,511<br>45  | ,035<br>,818<br>45                          | ,229<br>,130<br>45                                  | -,249<br>,099<br>45                              |
| Evenness          | Correlation Coefficient<br>Sig. (2-tailed)<br>N | -,186<br>,222<br>45        | ,322<br>,031<br>45  | ,030<br>,844<br>45                          | ,073<br>,632<br>45                                  | ,176<br>,247<br>45                               |
| CHOL_change       | Correlation Coefficient<br>Sig. (2-tailed)<br>N | ,155<br>,308<br>45         | -,110<br>,473<br>45 | ,006<br>,971<br>45                          | ,000<br>1,000<br>45                                 | ,241<br>,110<br>45                               |



## Correlations

|                          | interaction_VTA<br>_change                      | interaction_rOF<br>C_change | interaction_rmO<br>FC_change | sumscore_GIQ<br>LI_change | Stool_frequenc<br>y_change | STGHRE_chan<br>ge   |
|--------------------------|-------------------------------------------------|-----------------------------|------------------------------|---------------------------|----------------------------|---------------------|
| LDL_change               | Correlation Coefficient<br>Sig. (2-tailed)<br>N | ,057<br>,721<br>41          | -,199<br>,196<br>44          | -,079<br>,608<br>45       | -,075<br>,631<br>44        | -,532<br>,000<br>42 |
| shannon.effective_change | Correlation Coefficient<br>Sig. (2-tailed)<br>N | -,253<br>,115<br>40         | -,154<br>,324<br>43          | ,154<br>,319<br>44        | -,270<br>,080<br>43        | ,007<br>,964<br>42  |
| Richness_change          | Correlation Coefficient<br>Sig. (2-tailed)<br>N | -,211<br>,191<br>40         | -,177<br>,256<br>43          | ,122<br>,431<br>44        | -,326<br>,033<br>43        | -,070<br>,659<br>42 |
| Evenness_change          | Correlation Coefficient<br>Sig. (2-tailed)<br>N | -,227<br>,159<br>40         | -,045<br>,772<br>43          | ,171<br>,266<br>44        | ,106<br>,498<br>43         | ,124<br>,433<br>42  |
| Actinomyces_change       | Correlation Coefficient<br>Sig. (2-tailed)<br>N | ,268<br>,094<br>40          | ,173<br>,268<br>43           | -,130<br>,401<br>44       | -,006<br>,972<br>43        | ,008<br>,958<br>42  |
| Aerostipes_change        | Correlation Coefficient<br>Sig. (2-tailed)<br>N | -,206<br>,201<br>40         | ,039<br>,806<br>43           | ,021<br>,892<br>44        | ,325<br>,034<br>43         | -,040<br>,803<br>42 |
| Bifidobacterium_change   | Correlation Coefficient<br>Sig. (2-tailed)<br>N | -,136<br>,401<br>40         | ,098<br>,533<br>43           | -,109<br>,482<br>44       | -,125<br>,425<br>43        | -,225<br>,151<br>42 |
| Blautia_change           | Correlation Coefficient<br>Sig. (2-tailed)<br>N | ,179<br>,270<br>40          | ,084<br>,594<br>43           | ,166<br>,283<br>44        | ,115<br>,465<br>43         | ,163<br>,301<br>42  |

## Correlations

|                          |                         | STPYY_change | STGLPT_chan<br>ge | age   | BMI   | FM_stand | Richness | shannon.<br>effective |
|--------------------------|-------------------------|--------------|-------------------|-------|-------|----------|----------|-----------------------|
| LDL_change               | Correlation Coefficient | ,080         | ,233              | ,052  | ,202  | ,478     | -,042    | -,119                 |
|                          | Sig. (2-tailed)         | ,615         | ,137              | ,733  | ,179  | ,001     | ,781     | ,430                  |
|                          | N                       | 42           | 42                | 46    | 46    | 46       | 46       | 46                    |
| shannon.effective_change | Correlation Coefficient | -,089        | ,014              | -,019 | -,130 | ,014     | ,490     | ,570                  |
|                          | Sig. (2-tailed)         | ,575         | ,928              | ,903  | ,395  | ,927     | ,001     | ,000                  |
|                          | N                       | 42           | 42                | 45    | 45    | 45       | 45       | 45                    |
| Richness_change          | Correlation Coefficient | -,204        | -,014             | ,089  | -,105 | ,167     | ,500     | ,512                  |
|                          | Sig. (2-tailed)         | ,196         | ,931              | ,559  | ,492  | ,274     | ,000     | ,000                  |
|                          | N                       | 42           | 42                | 45    | 45    | 45       | 45       | 45                    |
| Evenness_change          | Correlation Coefficient | ,122         | ,073              | -,205 | -,086 | -,303    | ,137     | ,306                  |
|                          | Sig. (2-tailed)         | ,442         | ,644              | ,177  | ,575  | ,043     | ,370     | ,041                  |
|                          | N                       | 42           | 42                | 45    | 45    | 45       | 45       | 45                    |
| Actinomyces_change       | Correlation Coefficient | ,084         | -,030             | -,004 | -,121 | ,085     | -,028    | -,017                 |
|                          | Sig. (2-tailed)         | ,599         | ,852              | ,979  | ,429  | ,577     | ,856     | ,912                  |
|                          | N                       | 42           | 42                | 45    | 45    | 45       | 45       | 45                    |
| Aerostipes_change        | Correlation Coefficient | ,001         | ,067              | -,078 | ,105  | -,157    | ,011     | ,036                  |
|                          | Sig. (2-tailed)         | ,995         | ,673              | ,611  | ,491  | ,305     | ,943     | ,816                  |
|                          | N                       | 42           | 42                | 45    | 45    | 45       | 45       | 45                    |
| Bifidobacterium_change   | Correlation Coefficient | ,012         | ,014              | -,044 | ,013  | ,323     | -,514    | -,582                 |
|                          | Sig. (2-tailed)         | ,940         | ,929              | ,774  | ,933  | ,031     | ,000     | ,000                  |
|                          | N                       | 42           | 42                | 45    | 45    | 45       | 45       | 45                    |
| Blautia_change           | Correlation Coefficient | -,021        | ,209              | ,083  | -,132 | -,159    | -,145    | -,055                 |
|                          | Sig. (2-tailed)         | ,894         | ,184              | ,588  | ,387  | ,296     | ,341     | ,722                  |
|                          | N                       | 42           | 42                | 45    | 45    | 45       | 45       | 45                    |

## Correlations

|                          |                         | simpson.<br>effective | Evenness | CHOL_change | LDL_change | shannon.<br>effective | Richness_change |
|--------------------------|-------------------------|-----------------------|----------|-------------|------------|-----------------------|-----------------|
| LDL_change               | Correlation Coefficient | -,149                 | -,082    | ,926        | 1,000      | -,187                 | -,043           |
|                          | Sig. (2-tailed)         | ,322                  | ,588     | ,000        | .          | ,218                  | ,779            |
|                          | N                       | 46                    | 46       | 46          | 46         | 45                    | 45              |
| shannon.effective_change | Correlation Coefficient | ,586                  | ,347     | -,144       | -,187      | 1,000                 | ,901            |
|                          | Sig. (2-tailed)         | ,000                  | ,020     | ,344        | ,218       | .                     | ,000            |
|                          | N                       | 45                    | 45       | 45          | 45         | 45                    | 45              |
| Richness_change          | Correlation Coefficient | ,500                  | ,163     | ,038        | -,043      | ,901                  | 1,000           |
|                          | Sig. (2-tailed)         | ,000                  | ,285     | ,806        | ,779       | ,000                  | .               |
|                          | N                       | 45                    | 45       | 45          | 45         | 45                    | 45              |
| Evenness_change          | Correlation Coefficient | ,373                  | ,600     | -,308       | -,206      | ,451                  | ,062            |
|                          | Sig. (2-tailed)         | ,012                  | ,000     | ,039        | ,175       | ,002                  | ,687            |
|                          | N                       | 45                    | 45       | 45          | 45         | 45                    | 45              |
| Actinomyces_change       | Correlation Coefficient | -,085                 | ,010     | ,118        | ,092       | ,176                  | ,275            |
|                          | Sig. (2-tailed)         | ,577                  | ,949     | ,441        | ,547       | ,247                  | ,067            |
|                          | N                       | 45                    | 45       | 45          | 45         | 45                    | 45              |
| Aerostipes_change        | Correlation Coefficient | ,058                  | ,155     | -,260       | -,246      | -,101                 | -,185           |
|                          | Sig. (2-tailed)         | ,703                  | ,309     | ,084        | ,103       | ,508                  | ,223            |
|                          | N                       | 45                    | 45       | 45          | 45         | 45                    | 45              |
| Bifidobacterium_change   | Correlation Coefficient | -,626                 | -,401    | ,153        | ,145       | -,414                 | -,300           |
|                          | Sig. (2-tailed)         | ,000                  | ,006     | ,316        | ,343       | ,005                  | ,045            |
|                          | N                       | 45                    | 45       | 45          | 45         | 45                    | 45              |
| Blautia_change           | Correlation Coefficient | -,032                 | ,355     | -,016       | -,062      | ,010                  | -,036           |
|                          | Sig. (2-tailed)         | ,833                  | ,017     | ,914        | ,684       | ,947                  | ,817            |
|                          | N                       | 45                    | 45       | 45          | 45         | 45                    | 45              |

## Correlations

|                          |                         | Evenness_chan<br>ge | Actinomyces_c<br>hange | Aerostipes_cha<br>nge | Bifidobacterium<br>_change | Blautia_change | Collinsella_cha<br>nge |
|--------------------------|-------------------------|---------------------|------------------------|-----------------------|----------------------------|----------------|------------------------|
| LDL_change               | Correlation Coefficient | -,206               | ,092                   | -,246                 | ,145                       | -,062          | ,085                   |
|                          | Sig. (2-tailed)         | ,175                | ,547                   | ,103                  | ,343                       | ,684           | ,580                   |
|                          | N                       | 45                  | 45                     | 45                    | 45                         | 45             | 45                     |
| shannon.effective_change | Correlation Coefficient | ,451                | ,176                   | -,101                 | -,414                      | ,010           | -,269                  |
|                          | Sig. (2-tailed)         | ,002                | ,247                   | ,508                  | ,005                       | ,947           | ,074                   |
|                          | N                       | 45                  | 45                     | 45                    | 45                         | 45             | 45                     |
| Richness_change          | Correlation Coefficient | ,062                | ,275                   | -,185                 | -,300                      | -,036          | -,256                  |
|                          | Sig. (2-tailed)         | ,687                | ,067                   | ,223                  | ,045                       | ,817           | ,090                   |
|                          | N                       | 45                  | 45                     | 45                    | 45                         | 45             | 45                     |
| Evenness_change          | Correlation Coefficient | 1,000               | -,099                  | ,142                  | -,427                      | ,167           | -,115                  |
|                          | Sig. (2-tailed)         | .                   | ,516                   | ,352                  | ,003                       | ,273           | ,452                   |
|                          | N                       | 45                  | 45                     | 45                    | 45                         | 45             | 45                     |
| Actinomyces_change       | Correlation Coefficient | -,099               | 1,000                  | -,172                 | ,075                       | ,364           | ,391                   |
|                          | Sig. (2-tailed)         | ,516                | .                      | ,259                  | ,626                       | ,014           | ,008                   |
|                          | N                       | 45                  | 45                     | 45                    | 45                         | 45             | 45                     |
| Aerostipes_change        | Correlation Coefficient | ,142                | -,172                  | 1,000                 | -,064                      | -,023          | -,083                  |
|                          | Sig. (2-tailed)         | ,352                | ,259                   | .                     | ,675                       | ,881           | ,587                   |
|                          | N                       | 45                  | 45                     | 45                    | 45                         | 45             | 45                     |
| Bifidobacterium_change   | Correlation Coefficient | -,427               | ,075                   | -,064                 | 1,000                      | -,024          | ,312                   |
|                          | Sig. (2-tailed)         | ,003                | ,626                   | ,675                  | .                          | ,876           | ,037                   |
|                          | N                       | 45                  | 45                     | 45                    | 45                         | 45             | 45                     |
| Blautia_change           | Correlation Coefficient | ,167                | ,364                   | -,023                 | -,024                      | 1,000          | ,173                   |
|                          | Sig. (2-tailed)         | ,273                | ,014                   | ,881                  | ,876                       | .              | ,256                   |
|                          | N                       | 45                  | 45                     | 45                    | 45                         | 45             | 45                     |

## Correlations

|                          |                         | Desulfovibrio_c<br>hange | Eggerthella_ch<br>ange | Erysipelatoclost<br>ridium_ch<br>ange | Faecalitalea_ch<br>ange | Family.XIII.<br>AD3011.<br>group_change | Family.XIII.<br>UCG.<br>001_change |
|--------------------------|-------------------------|--------------------------|------------------------|---------------------------------------|-------------------------|-----------------------------------------|------------------------------------|
| LDL_change               | Correlation Coefficient | -,147                    | ,137                   | ,160                                  | -,170                   | -,126                                   | -,286                              |
|                          | Sig. (2-tailed)         | ,334                     | ,371                   | ,295                                  | ,263                    | ,409                                    | ,056                               |
|                          | N                       | 45                       | 45                     | 45                                    | 45                      | 45                                      | 45                                 |
| shannon.effective_change | Correlation Coefficient | ,041                     | -,006                  | ,287                                  | -,093                   | ,334                                    | ,194                               |
|                          | Sig. (2-tailed)         | ,791                     | ,966                   | ,056                                  | ,543                    | ,025                                    | ,201                               |
|                          | N                       | 45                       | 45                     | 45                                    | 45                      | 45                                      | 45                                 |
| Richness_change          | Correlation Coefficient | ,028                     | ,091                   | ,267                                  | -,076                   | ,297                                    | ,180                               |
|                          | Sig. (2-tailed)         | ,857                     | ,552                   | ,077                                  | ,620                    | ,048                                    | ,237                               |
|                          | N                       | 45                       | 45                     | 45                                    | 45                      | 45                                      | 45                                 |
| Evenness_change          | Correlation Coefficient | ,122                     | -,169                  | ,145                                  | -,015                   | ,144                                    | ,090                               |
|                          | Sig. (2-tailed)         | ,423                     | ,268                   | ,341                                  | ,921                    | ,345                                    | ,557                               |
|                          | N                       | 45                       | 45                     | 45                                    | 45                      | 45                                      | 45                                 |
| Actinomyces_change       | Correlation Coefficient | -,057                    | ,254                   | -,007                                 | ,178                    | ,214                                    | -,189                              |
|                          | Sig. (2-tailed)         | ,711                     | ,092                   | ,966                                  | ,243                    | ,159                                    | ,214                               |
|                          | N                       | 45                       | 45                     | 45                                    | 45                      | 45                                      | 45                                 |
| Aerostipes_change        | Correlation Coefficient | ,062                     | -,320                  | -,375                                 | ,193                    | ,098                                    | ,233                               |
|                          | Sig. (2-tailed)         | ,684                     | ,032                   | ,011                                  | ,205                    | ,524                                    | ,124                               |
|                          | N                       | 45                       | 45                     | 45                                    | 45                      | 45                                      | 45                                 |
| Bifidobacterium_change   | Correlation Coefficient | -,004                    | ,083                   | -,023                                 | ,070                    | -,494                                   | -,305                              |
|                          | Sig. (2-tailed)         | ,978                     | ,587                   | ,879                                  | ,650                    | ,001                                    | ,042                               |
|                          | N                       | 45                       | 45                     | 45                                    | 45                      | 45                                      | 45                                 |
| Blautia_change           | Correlation Coefficient | ,021                     | ,208                   | ,012                                  | ,088                    | ,014                                    | -,103                              |
|                          | Sig. (2-tailed)         | ,891                     | ,171                   | ,937                                  | ,566                    | ,927                                    | ,499                               |
|                          | N                       | 45                       | 45                     | 45                                    | 45                      | 45                                      | 45                                 |

## Correlations

|                          |                         | Gemella_chang<br>e | Gordoniabacter_<br>change | Holdemanella_<br>change | Holdemania_<br>change | Lachnospiracea<br>e.FCS020.<br>group_change | Lachnospiracea<br>e.NK4A136.<br>group_change |
|--------------------------|-------------------------|--------------------|---------------------------|-------------------------|-----------------------|---------------------------------------------|----------------------------------------------|
| LDL_change               | Correlation Coefficient | ,118               | ,030                      | ,119                    | -,187                 | ,198                                        | ,030                                         |
|                          | Sig. (2-tailed)         | ,439               | ,847                      | ,437                    | ,219                  | ,193                                        | ,846                                         |
|                          | N                       | 45                 | 45                        | 45                      | 45                    | 45                                          | 45                                           |
| shannon.effective_change | Correlation Coefficient | ,046               | ,213                      | ,130                    | ,129                  | ,090                                        | ,325                                         |
|                          | Sig. (2-tailed)         | ,766               | ,160                      | ,395                    | ,400                  | ,555                                        | ,029                                         |
|                          | N                       | 45                 | 45                        | 45                      | 45                    | 45                                          | 45                                           |
| Richness_change          | Correlation Coefficient | ,103               | ,319                      | ,156                    | ,157                  | ,105                                        | ,289                                         |
|                          | Sig. (2-tailed)         | ,501               | ,033                      | ,305                    | ,304                  | ,493                                        | ,055                                         |
|                          | N                       | 45                 | 45                        | 45                      | 45                    | 45                                          | 45                                           |
| Evenness_change          | Correlation Coefficient | -,096              | -,097                     | -,017                   | ,045                  | ,062                                        | ,138                                         |
|                          | Sig. (2-tailed)         | ,532               | ,527                      | ,911                    | ,772                  | ,686                                        | ,365                                         |
|                          | N                       | 45                 | 45                        | 45                      | 45                    | 45                                          | 45                                           |
| Actinomyces_change       | Correlation Coefficient | ,497               | ,141                      | ,092                    | -,328                 | ,082                                        | -,158                                        |
|                          | Sig. (2-tailed)         | ,001               | ,357                      | ,548                    | ,028                  | ,592                                        | ,300                                         |
|                          | N                       | 45                 | 45                        | 45                      | 45                    | 45                                          | 45                                           |
| Aerostipes_change        | Correlation Coefficient | -,093              | -,081                     | ,068                    | ,138                  | -,184                                       | -,157                                        |
|                          | Sig. (2-tailed)         | ,542               | ,595                      | ,657                    | ,366                  | ,227                                        | ,302                                         |
|                          | N                       | 45                 | 45                        | 45                      | 45                    | 45                                          | 45                                           |
| Bifidobacterium_change   | Correlation Coefficient | ,039               | -,351                     | -,172                   | -,160                 | -,103                                       | -,370                                        |
|                          | Sig. (2-tailed)         | ,799               | ,018                      | ,258                    | ,294                  | ,499                                        | ,012                                         |
|                          | N                       | 45                 | 45                        | 45                      | 45                    | 45                                          | 45                                           |
| Blautia_change           | Correlation Coefficient | ,547               | ,121                      | ,251                    | -,244                 | ,216                                        | -,377                                        |
|                          | Sig. (2-tailed)         | ,000               | ,427                      | ,096                    | ,106                  | ,154                                        | ,011                                         |
|                          | N                       | 45                 | 45                        | 45                      | 45                    | 45                                          | 45                                           |

## Correlations

|                          |                         | Lactiplantibacillus_change | Lactobacillus_change | Libanicoccus_change | Ligilactobacillus_change | Limosilactobacillus_change | Roseburia_change |
|--------------------------|-------------------------|----------------------------|----------------------|---------------------|--------------------------|----------------------------|------------------|
| LDL_change               | Correlation Coefficient | -,114                      | ,255                 | -,003               | ,011                     | -,056                      | -,021            |
|                          | Sig. (2-tailed)         | ,455                       | ,091                 | ,986                | ,941                     | ,713                       | ,893             |
|                          | N                       | 45                         | 45                   | 45                  | 45                       | 45                         | 45               |
| shannon.effective_change | Correlation Coefficient | -,116                      | -,398                | -,164               | ,006                     | ,038                       | ,107             |
|                          | Sig. (2-tailed)         | ,446                       | ,007                 | ,281                | ,969                     | ,803                       | ,485             |
|                          | N                       | 45                         | 45                   | 45                  | 45                       | 45                         | 45               |
| Richness_change          | Correlation Coefficient | -,049                      | -,220                | -,170               | -,101                    | ,025                       | ,211             |
|                          | Sig. (2-tailed)         | ,751                       | ,147                 | ,264                | ,508                     | ,872                       | ,165             |
|                          | N                       | 45                         | 45                   | 45                  | 45                       | 45                         | 45               |
| Evenness_change          | Correlation Coefficient | -,240                      | -,370                | ,053                | ,320                     | -,008                      | -,188            |
|                          | Sig. (2-tailed)         | ,112                       | ,012                 | ,732                | ,032                     | ,958                       | ,216             |
|                          | N                       | 45                         | 45                   | 45                  | 45                       | 45                         | 45               |
| Actinomyces_change       | Correlation Coefficient | ,225                       | -,099                | -,038               | ,003                     | -,038                      | -,040            |
|                          | Sig. (2-tailed)         | ,137                       | ,519                 | ,803                | ,982                     | ,806                       | ,792             |
|                          | N                       | 45                         | 45                   | 45                  | 45                       | 45                         | 45               |
| Aerostipes_change        | Correlation Coefficient | -,043                      | -,033                | ,071                | -,024                    | ,228                       | -,111            |
|                          | Sig. (2-tailed)         | ,779                       | ,828                 | ,643                | ,874                     | ,132                       | ,468             |
|                          | N                       | 45                         | 45                   | 45                  | 45                       | 45                         | 45               |
| Bifidobacterium_change   | Correlation Coefficient | ,360                       | ,159                 | ,153                | ,072                     | ,077                       | ,142             |
|                          | Sig. (2-tailed)         | ,015                       | ,297                 | ,315                | ,640                     | ,616                       | ,353             |
|                          | N                       | 45                         | 45                   | 45                  | 45                       | 45                         | 45               |
| Blautia_change           | Correlation Coefficient | ,258                       | -,086                | ,051                | ,133                     | ,093                       | -,313            |
|                          | Sig. (2-tailed)         | ,087                       | ,575                 | ,741                | ,384                     | ,542                       | ,037             |
|                          | N                       | 45                         | 45                   | 45                  | 45                       | 45                         | 45               |

## Correlations

|                          |                         | Shuttleworthia_<br>change | Subdoligranulu<br>m_change | UCG.<br>003_change | Xi.Eubacterium..<br>brachy.<br>group_change | X.<br>Ruminococcus.<br>.gavvreauii.<br>group_change | X.<br>Ruminococcus.<br>.torques.<br>group_change |
|--------------------------|-------------------------|---------------------------|----------------------------|--------------------|---------------------------------------------|-----------------------------------------------------|--------------------------------------------------|
| LDL_change               | Correlation Coefficient | ,231                      | -,104                      | -,018              | -,050                                       | ,241                                                | -,037                                            |
|                          | Sig. (2-tailed)         | ,126                      | ,496                       | ,907               | ,745                                        | ,111                                                | ,812                                             |
|                          | N                       | 45                        | 45                         | 45                 | 45                                          | 45                                                  | 45                                               |
| shannon.effective_change | Correlation Coefficient | -,047                     | ,162                       | ,051               | ,281                                        | ,010                                                | ,083                                             |
|                          | Sig. (2-tailed)         | ,758                      | ,288                       | ,738               | ,061                                        | ,950                                                | ,586                                             |
|                          | N                       | 45                        | 45                         | 45                 | 45                                          | 45                                                  | 45                                               |
| Richness_change          | Correlation Coefficient | ,056                      | ,054                       | ,088               | ,364                                        | -,028                                               | ,019                                             |
|                          | Sig. (2-tailed)         | ,717                      | ,722                       | ,567               | ,014                                        | ,854                                                | ,904                                             |
|                          | N                       | 45                        | 45                         | 45                 | 45                                          | 45                                                  | 45                                               |
| Evenness_change          | Correlation Coefficient | -,228                     | ,348                       | -,141              | -,061                                       | ,121                                                | ,242                                             |
|                          | Sig. (2-tailed)         | ,132                      | ,019                       | ,357               | ,689                                        | ,428                                                | ,109                                             |
|                          | N                       | 45                        | 45                         | 45                 | 45                                          | 45                                                  | 45                                               |
| Actinomyces_change       | Correlation Coefficient | -,089                     | ,121                       | -,185              | ,205                                        | ,018                                                | ,286                                             |
|                          | Sig. (2-tailed)         | ,561                      | ,428                       | ,225               | ,178                                        | ,908                                                | ,056                                             |
|                          | N                       | 45                        | 45                         | 45                 | 45                                          | 45                                                  | 45                                               |
| Aerostipes_change        | Correlation Coefficient | -,052                     | ,163                       | -,084              | ,134                                        | -,190                                               | ,134                                             |
|                          | Sig. (2-tailed)         | ,735                      | ,285                       | ,582               | ,381                                        | ,211                                                | ,380                                             |
|                          | N                       | 45                        | 45                         | 45                 | 45                                          | 45                                                  | 45                                               |
| Bifidobacterium_change   | Correlation Coefficient | ,255                      | -,264                      | -,189              | -,085                                       | ,233                                                | -,128                                            |
|                          | Sig. (2-tailed)         | ,091                      | ,079                       | ,215               | ,580                                        | ,124                                                | ,402                                             |
|                          | N                       | 45                        | 45                         | 45                 | 45                                          | 45                                                  | 45                                               |
| Blautia_change           | Correlation Coefficient | -,246                     | ,239                       | -,396              | ,195                                        | ,209                                                | ,288                                             |
|                          | Sig. (2-tailed)         | ,104                      | ,114                       | ,007               | ,199                                        | ,169                                                | ,055                                             |
|                          | N                       | 45                        | 45                         | 45                 | 45                                          | 45                                                  | 45                                               |



## Correlations

|                                 | interaction_VTA<br>_change                      | interaction_rOF<br>C_change | interaction_rmO<br>FC_change | sumscore_GIQ<br>LI_change | Stool_frequenc<br>y_change | STGHRE_chan<br>ge   |
|---------------------------------|-------------------------------------------------|-----------------------------|------------------------------|---------------------------|----------------------------|---------------------|
| Collinsella_change              | Correlation Coefficient<br>Sig. (2-tailed)<br>N | ,024<br>,878<br>43          | ,178<br>,271<br>40           | ,150<br>,339<br>43        | -,202<br>,189<br>44        | ,151<br>,333<br>43  |
| Desulfovibrio_change            | Correlation Coefficient<br>Sig. (2-tailed)<br>N | ,034<br>,830<br>43          | -,009<br>,955<br>40          | -,084<br>,591<br>43       | ,059<br>,704<br>44         | ,066<br>,674<br>43  |
| Eggerthella_change              | Correlation Coefficient<br>Sig. (2-tailed)<br>N | ,020<br>,899<br>43          | ,022<br>,892<br>40           | -,027<br>,862<br>43       | ,104<br>,503<br>44         | -,131<br>,403<br>43 |
| Erysipelatoclostridium_change   | Correlation Coefficient<br>Sig. (2-tailed)<br>N | ,159<br>,309<br>43          | -,021<br>,900<br>40          | -,063<br>,688<br>43       | ,190<br>,216<br>44         | -,291<br>,058<br>43 |
| Faecalitalea_change             | Correlation Coefficient<br>Sig. (2-tailed)<br>N | -,099<br>,526<br>43         | -,018<br>,911<br>40          | ,035<br>,825<br>43        | ,038<br>,809<br>44         | -,040<br>,798<br>43 |
| Family.XIII.AD3011_group_change | Correlation Coefficient<br>Sig. (2-tailed)<br>N | ,121<br>,440<br>43          | ,191<br>,238<br>40           | ,070<br>,655<br>43        | ,180<br>,241<br>44         | ,250<br>,105<br>43  |
| Family.XIII.UCG.001_change      | Correlation Coefficient<br>Sig. (2-tailed)<br>N | -,080<br>,611<br>43         | ,064<br>,696<br>40           | -,206<br>,185<br>43       | ,009<br>,953<br>44         | -,054<br>,731<br>43 |
| Gemella_change                  | Correlation Coefficient<br>Sig. (2-tailed)<br>N | -,174<br>,264<br>43         | ,295<br>,064<br>40           | ,196<br>,209<br>43        | ,086<br>,577<br>44         | -,119<br>,445<br>43 |

## Correlations

|                                     | STPYY_change                                    | STGLPT_chan<br>ge   | age                 | BMI                 | FM_stand            | Richness            | shannon.<br>effective |
|-------------------------------------|-------------------------------------------------|---------------------|---------------------|---------------------|---------------------|---------------------|-----------------------|
| Collinsella_change                  | Correlation Coefficient<br>Sig. (2-tailed)<br>N | ,176<br>,266<br>42  | ,004<br>,978<br>42  | -,228<br>,133<br>45 | -,035<br>,820<br>45 | ,013<br>,932<br>45  | -,354<br>,017<br>45   |
| Desulfovibrio_change                | Correlation Coefficient<br>Sig. (2-tailed)<br>N | -,370<br>,016<br>42 | -,069<br>,666<br>42 | ,135<br>,378<br>45  | -,268<br>,075<br>45 | -,284<br>,059<br>45 | -,048<br>,753<br>45   |
| Eggerthella_change                  | Correlation Coefficient<br>Sig. (2-tailed)<br>N | ,032<br>,839<br>42  | ,103<br>,518<br>42  | ,151<br>,322<br>45  | ,107<br>,485<br>45  | ,228<br>,131<br>45  | ,118<br>,438<br>45    |
| Erysipelatoclostridium_change       | Correlation Coefficient<br>Sig. (2-tailed)<br>N | -,017<br>,913<br>42 | ,296<br>,057<br>42  | ,005<br>,973<br>45  | ,250<br>,097<br>45  | ,207<br>,172<br>45  | ,120<br>,433<br>45    |
| Faecalitalea_change                 | Correlation Coefficient<br>Sig. (2-tailed)<br>N | ,011<br>,945<br>42  | ,090<br>,570<br>42  | -,041<br>,788<br>45 | ,041<br>,791<br>45  | ,055<br>,721<br>45  | ,011<br>,942<br>45    |
| Family.XIII.AD3011.<br>group_change | Correlation Coefficient<br>Sig. (2-tailed)<br>N | ,171<br>,279<br>42  | ,058<br>,717<br>42  | -,057<br>,711<br>45 | ,033<br>,831<br>45  | -,024<br>,876<br>45 | ,350<br>,018<br>45    |
| Family.XIII.UCG.<br>001_change      | Correlation Coefficient<br>Sig. (2-tailed)<br>N | ,017<br>,913<br>42  | ,205<br>,192<br>42  | ,067<br>,663<br>45  | -,199<br>,190<br>45 | -,306<br>,041<br>45 | ,256<br>,090<br>45    |
| Gemella_change                      | Correlation Coefficient<br>Sig. (2-tailed)<br>N | -,139<br>,381<br>42 | ,150<br>,342<br>42  | ,200<br>,187<br>45  | -,204<br>,180<br>45 | -,199<br>,189<br>45 | -,070<br>,648<br>45   |

## Correlations

|                                 |                         | simpson.<br>effective | Evenness | CHOL_change | LDL_change | shannon.<br>effective | Richness_change |
|---------------------------------|-------------------------|-----------------------|----------|-------------|------------|-----------------------|-----------------|
| Collinsella_change              | Correlation Coefficient | -,369                 | -,060    | ,110        | ,085       | -,269                 | -,256           |
|                                 | Sig. (2-tailed)         | ,012                  | ,697     | ,474        | ,580       | ,074                  | ,090            |
|                                 | N                       | 45                    | 45       | 45          | 45         | 45                    | 45              |
| Desulfovibrio_change            | Correlation Coefficient | -,059                 | -,091    | -,270       | -,147      | ,041                  | ,028            |
|                                 | Sig. (2-tailed)         | ,699                  | ,553     | ,073        | ,334       | ,791                  | ,857            |
|                                 | N                       | 45                    | 45       | 45          | 45         | 45                    | 45              |
| Eggerthella_change              | Correlation Coefficient | ,084                  | ,081     | ,203        | ,137       | -,006                 | ,091            |
|                                 | Sig. (2-tailed)         | ,583                  | ,595     | ,181        | ,371       | ,966                  | ,552            |
|                                 | N                       | 45                    | 45       | 45          | 45         | 45                    | 45              |
| Erysipelatoclostridium_change   | Correlation Coefficient | ,126                  | -,016    | ,152        | ,160       | ,287                  | ,267            |
|                                 | Sig. (2-tailed)         | ,408                  | ,919     | ,318        | ,295       | ,056                  | ,077            |
|                                 | N                       | 45                    | 45       | 45          | 45         | 45                    | 45              |
| Faecalitalea_change             | Correlation Coefficient | ,041                  | ,117     | -,149       | -,170      | -,093                 | -,076           |
|                                 | Sig. (2-tailed)         | ,788                  | ,443     | ,328        | ,263       | ,543                  | ,620            |
|                                 | N                       | 45                    | 45       | 45          | 45         | 45                    | 45              |
| Family.XIII.AD3011_group_change | Correlation Coefficient | ,293                  | ,022     | -,174       | -,126      | ,334                  | ,297            |
|                                 | Sig. (2-tailed)         | ,051                  | ,885     | ,253        | ,409       | ,025                  | ,048            |
|                                 | N                       | 45                    | 45       | 45          | 45         | 45                    | 45              |
| Family.XIII.UCG.001_change      | Correlation Coefficient | ,240                  | -,001    | -,319       | -,286      | ,194                  | ,180            |
|                                 | Sig. (2-tailed)         | ,113                  | ,996     | ,033        | ,056       | ,201                  | ,237            |
|                                 | N                       | 45                    | 45       | 45          | 45         | 45                    | 45              |
| Gemella_change                  | Correlation Coefficient | -,066                 | -,034    | ,155        | ,118       | ,046                  | ,103            |
|                                 | Sig. (2-tailed)         | ,667                  | ,824     | ,311        | ,439       | ,766                  | ,501            |
|                                 | N                       | 45                    | 45       | 45          | 45         | 45                    | 45              |

## Correlations

|                                 |                         | Evenness_change | Actinomyces_change | Aerostipes_change | Bifidobacterium_change | Blautia_change | Collinsella_change |
|---------------------------------|-------------------------|-----------------|--------------------|-------------------|------------------------|----------------|--------------------|
| Collinsella_change              | Correlation Coefficient | -,115           | ,391               | -,083             | ,312                   | ,173           | 1,000              |
|                                 | Sig. (2-tailed)         | ,452            | ,008               | ,587              | ,037                   | ,256           | .                  |
|                                 | N                       | 45              | 45                 | 45                | 45                     | 45             | 45                 |
| Desulfovibrio_change            | Correlation Coefficient | ,122            | -,057              | ,062              | -,004                  | ,021           | -,270              |
|                                 | Sig. (2-tailed)         | ,423            | ,711               | ,684              | ,978                   | ,891           | ,073               |
|                                 | N                       | 45              | 45                 | 45                | 45                     | 45             | 45                 |
| Eggerthella_change              | Correlation Coefficient | -,169           | ,254               | -,320             | ,083                   | ,208           | -,016              |
|                                 | Sig. (2-tailed)         | ,268            | ,092               | ,032              | ,587                   | ,171           | ,919               |
|                                 | N                       | 45              | 45                 | 45                | 45                     | 45             | 45                 |
| Erysipelatoclostridium_change   | Correlation Coefficient | ,145            | -,007              | -,375             | -,023                  | ,012           | ,054               |
|                                 | Sig. (2-tailed)         | ,341            | ,966               | ,011              | ,879                   | ,937           | ,724               |
|                                 | N                       | 45              | 45                 | 45                | 45                     | 45             | 45                 |
| Faecalitalea_change             | Correlation Coefficient | -,015           | ,178               | ,193              | ,070                   | ,088           | -,073              |
|                                 | Sig. (2-tailed)         | ,921            | ,243               | ,205              | ,650                   | ,566           | ,632               |
|                                 | N                       | 45              | 45                 | 45                | 45                     | 45             | 45                 |
| Family.XIII.AD3011_group_change | Correlation Coefficient | ,144            | ,214               | ,098              | -,494                  | ,014           | -,084              |
|                                 | Sig. (2-tailed)         | ,345            | ,159               | ,524              | ,001                   | ,927           | ,583               |
|                                 | N                       | 45              | 45                 | 45                | 45                     | 45             | 45                 |
| Family.XIII.UCG.001_change      | Correlation Coefficient | ,090            | -,189              | ,233              | -,305                  | -,103          | -,363              |
|                                 | Sig. (2-tailed)         | ,557            | ,214               | ,124              | ,042                   | ,499           | ,014               |
|                                 | N                       | 45              | 45                 | 45                | 45                     | 45             | 45                 |
| Gemella_change                  | Correlation Coefficient | -,096           | ,497               | -,093             | ,039                   | ,547           | ,322               |
|                                 | Sig. (2-tailed)         | ,532            | ,001               | ,542              | ,799                   | ,000           | ,031               |
|                                 | N                       | 45              | 45                 | 45                | 45                     | 45             | 45                 |

## Correlations

|                                     |                         | Desulfovibrio_c<br>hange | Eggerthella_ch<br>ange | Erysipelatoclost<br>ridium_change | Faecalitalea_ch<br>ange | Family.XIII.<br>AD3011.<br>group_change | Family.XIII.<br>UCG.<br>001_change |
|-------------------------------------|-------------------------|--------------------------|------------------------|-----------------------------------|-------------------------|-----------------------------------------|------------------------------------|
| Collinsella_change                  | Correlation Coefficient | -,270                    | -,016                  | ,054                              | -,073                   | -,084                                   | -,363                              |
|                                     | Sig. (2-tailed)         | ,073                     | ,919                   | ,724                              | ,632                    | ,583                                    | ,014                               |
|                                     | N                       | 45                       | 45                     | 45                                | 45                      | 45                                      | 45                                 |
| Desulfovibrio_change                | Correlation Coefficient | 1,000                    | -,155                  | ,038                              | ,067                    | -,074                                   | ,158                               |
|                                     | Sig. (2-tailed)         | .                        | ,311                   | ,805                              | ,663                    | ,629                                    | ,300                               |
|                                     | N                       | 45                       | 45                     | 45                                | 45                      | 45                                      | 45                                 |
| Eggerthella_change                  | Correlation Coefficient | -,155                    | 1,000                  | ,224                              | ,365                    | -,051                                   | -,217                              |
|                                     | Sig. (2-tailed)         | ,311                     | .                      | ,139                              | ,014                    | ,737                                    | ,151                               |
|                                     | N                       | 45                       | 45                     | 45                                | 45                      | 45                                      | 45                                 |
| Erysipelatoclostridium_change       | Correlation Coefficient | ,038                     | ,224                   | 1,000                             | ,148                    | ,065                                    | ,064                               |
|                                     | Sig. (2-tailed)         | ,805                     | ,139                   | .                                 | ,331                    | ,673                                    | ,676                               |
|                                     | N                       | 45                       | 45                     | 45                                | 45                      | 45                                      | 45                                 |
| Faecalitalea_change                 | Correlation Coefficient | ,067                     | ,365                   | ,148                              | 1,000                   | -,136                                   | ,064                               |
|                                     | Sig. (2-tailed)         | ,663                     | ,014                   | ,331                              | .                       | ,374                                    | ,678                               |
|                                     | N                       | 45                       | 45                     | 45                                | 45                      | 45                                      | 45                                 |
| Family.XIII.AD3011.<br>group_change | Correlation Coefficient | -,074                    | -,051                  | ,065                              | -,136                   | 1,000                                   | ,249                               |
|                                     | Sig. (2-tailed)         | ,629                     | ,737                   | ,673                              | ,374                    | .                                       | ,100                               |
|                                     | N                       | 45                       | 45                     | 45                                | 45                      | 45                                      | 45                                 |
| Family.XIII.UCG.<br>001_change      | Correlation Coefficient | ,158                     | -,217                  | ,064                              | ,064                    | ,249                                    | 1,000                              |
|                                     | Sig. (2-tailed)         | ,300                     | ,151                   | ,676                              | ,678                    | ,100                                    | .                                  |
|                                     | N                       | 45                       | 45                     | 45                                | 45                      | 45                                      | 45                                 |
| Gemella_change                      | Correlation Coefficient | ,194                     | ,023                   | ,101                              | ,008                    | -,021                                   | -,127                              |
|                                     | Sig. (2-tailed)         | ,202                     | ,879                   | ,510                              | ,957                    | ,893                                    | ,405                               |
|                                     | N                       | 45                       | 45                     | 45                                | 45                      | 45                                      | 45                                 |

## Correlations

|                                     |                         | Gemella_chang<br>e | Gordoniabacter_<br>change | Holdemanella_<br>change | Holdemania_<br>change | Lachnospiraceae.FCS020.<br>group_change | Lachnospiraceae.NK4A136.<br>group_change |
|-------------------------------------|-------------------------|--------------------|---------------------------|-------------------------|-----------------------|-----------------------------------------|------------------------------------------|
| Collinsella_change                  | Correlation Coefficient | ,322               | -,052                     | ,071                    | -,286                 | ,106                                    | -,529                                    |
|                                     | Sig. (2-tailed)         | ,031               | ,737                      | ,644                    | ,057                  | ,489                                    | ,000                                     |
|                                     | N                       | 45                 | 45                        | 45                      | 45                    | 45                                      | 45                                       |
| Desulfovibrio_change                | Correlation Coefficient | ,194               | -,078                     | -,030                   | ,003                  | -,042                                   | -,024                                    |
|                                     | Sig. (2-tailed)         | ,202               | ,610                      | ,845                    | ,986                  | ,782                                    | ,873                                     |
|                                     | N                       | 45                 | 45                        | 45                      | 45                    | 45                                      | 45                                       |
| Eggerthella_change                  | Correlation Coefficient | ,023               | ,384                      | ,098                    | ,139                  | ,020                                    | -,054                                    |
|                                     | Sig. (2-tailed)         | ,879               | ,009                      | ,521                    | ,362                  | ,897                                    | ,727                                     |
|                                     | N                       | 45                 | 45                        | 45                      | 45                    | 45                                      | 45                                       |
| Erysipelatoclostridium_change       | Correlation Coefficient | ,101               | ,224                      | ,088                    | -,060                 | ,162                                    | ,052                                     |
|                                     | Sig. (2-tailed)         | ,510               | ,140                      | ,566                    | ,694                  | ,288                                    | ,736                                     |
|                                     | N                       | 45                 | 45                        | 45                      | 45                    | 45                                      | 45                                       |
| Faecalitalea_change                 | Correlation Coefficient | ,008               | ,183                      | ,085                    | ,040                  | -,221                                   | -,278                                    |
|                                     | Sig. (2-tailed)         | ,957               | ,230                      | ,581                    | ,794                  | ,145                                    | ,064                                     |
|                                     | N                       | 45                 | 45                        | 45                      | 45                    | 45                                      | 45                                       |
| Family.XIII.AD3011.<br>group_change | Correlation Coefficient | -,021              | -,040                     | ,227                    | -,016                 | ,038                                    | ,335                                     |
|                                     | Sig. (2-tailed)         | ,893               | ,792                      | ,134                    | ,916                  | ,802                                    | ,024                                     |
|                                     | N                       | 45                 | 45                        | 45                      | 45                    | 45                                      | 45                                       |
| Family.XIII.UCG.<br>001_change      | Correlation Coefficient | -,127              | -,023                     | -,114                   | ,170                  | ,064                                    | ,207                                     |
|                                     | Sig. (2-tailed)         | ,405               | ,879                      | ,458                    | ,263                  | ,676                                    | ,172                                     |
|                                     | N                       | 45                 | 45                        | 45                      | 45                    | 45                                      | 45                                       |
| Gemella_change                      | Correlation Coefficient | 1,000              | ,128                      | ,330                    | -,465                 | ,300                                    | -,431                                    |
|                                     | Sig. (2-tailed)         | .                  | ,402                      | ,027                    | ,001                  | ,045                                    | ,003                                     |
|                                     | N                       | 45                 | 45                        | 45                      | 45                    | 45                                      | 45                                       |

## Correlations

|                                 |                         | Lactiplantibacillus_change | Lactobacillus_change | Libanicoccus_change | Ligilactobacillus_change | Limosilactobacillus_change | Roseburia_change |
|---------------------------------|-------------------------|----------------------------|----------------------|---------------------|--------------------------|----------------------------|------------------|
| Collinsella_change              | Correlation Coefficient | ,286                       | -,006                | ,077                | ,218                     | ,132                       | -,219            |
|                                 | Sig. (2-tailed)         | ,057                       | ,969                 | ,614                | ,150                     | ,388                       | ,149             |
|                                 | N                       | 45                         | 45                   | 45                  | 45                       | 45                         | 45               |
| Desulfovibrio_change            | Correlation Coefficient | -,018                      | ,201                 | ,338                | -,054                    | ,258                       | ,130             |
|                                 | Sig. (2-tailed)         | ,905                       | ,186                 | ,023                | ,725                     | ,087                       | ,393             |
|                                 | N                       | 45                         | 45                   | 45                  | 45                       | 45                         | 45               |
| Eggerthella_change              | Correlation Coefficient | -,150                      | ,141                 | ,069                | -,030                    | -,057                      | -,037            |
|                                 | Sig. (2-tailed)         | ,326                       | ,356                 | ,652                | ,845                     | ,712                       | ,807             |
|                                 | N                       | 45                         | 45                   | 45                  | 45                       | 45                         | 45               |
| Erysipelatoclostridium_change   | Correlation Coefficient | -,149                      | -,121                | ,019                | ,245                     | -,069                      | ,107             |
|                                 | Sig. (2-tailed)         | ,329                       | ,430                 | ,903                | ,104                     | ,652                       | ,484             |
|                                 | N                       | 45                         | 45                   | 45                  | 45                       | 45                         | 45               |
| Faecalitalea_change             | Correlation Coefficient | -,141                      | ,157                 | ,072                | -,043                    | ,036                       | ,126             |
|                                 | Sig. (2-tailed)         | ,355                       | ,303                 | ,638                | ,778                     | ,812                       | ,411             |
|                                 | N                       | 45                         | 45                   | 45                  | 45                       | 45                         | 45               |
| Family.XIII.AD3011_group_change | Correlation Coefficient | ,185                       | -,149                | -,323               | ,035                     | -,104                      | -,224            |
|                                 | Sig. (2-tailed)         | ,224                       | ,330                 | ,031                | ,821                     | ,496                       | ,139             |
|                                 | N                       | 45                         | 45                   | 45                  | 45                       | 45                         | 45               |
| Family.XIII.UCG.001_change      | Correlation Coefficient | -,151                      | ,058                 | -,146               | ,222                     | ,128                       | ,120             |
|                                 | Sig. (2-tailed)         | ,322                       | ,705                 | ,337                | ,142                     | ,402                       | ,432             |
|                                 | N                       | 45                         | 45                   | 45                  | 45                       | 45                         | 45               |
| Gemella_change                  | Correlation Coefficient | ,304                       | ,020                 | ,122                | ,093                     | ,253                       | -,094            |
|                                 | Sig. (2-tailed)         | ,043                       | ,899                 | ,424                | ,545                     | ,094                       | ,541             |
|                                 | N                       | 45                         | 45                   | 45                  | 45                       | 45                         | 45               |

## Correlations

|                                     |                         | Shuttleworthia_<br>change | Subdoligranulu<br>m_change | UCG.<br>003_change | Xi.Eubacterium..<br>brachy.<br>group_change | X.<br>Ruminococcus.<br>.gavvreauii.<br>group_change | X.<br>Ruminococcus.<br>.torques.<br>group_change |
|-------------------------------------|-------------------------|---------------------------|----------------------------|--------------------|---------------------------------------------|-----------------------------------------------------|--------------------------------------------------|
| Collinsella_change                  | Correlation Coefficient | ,092                      | ,025                       | -,109              | -,063                                       | ,005                                                | ,158                                             |
|                                     | Sig. (2-tailed)         | ,546                      | ,869                       | ,474               | ,682                                        | ,976                                                | ,300                                             |
|                                     | N                       | 45                        | 45                         | 45                 | 45                                          | 45                                                  | 45                                               |
| Desulfovibrio_change                | Correlation Coefficient | ,020                      | -,113                      | -,052              | ,100                                        | -,043                                               | -,151                                            |
|                                     | Sig. (2-tailed)         | ,894                      | ,462                       | ,735               | ,513                                        | ,778                                                | ,323                                             |
|                                     | N                       | 45                        | 45                         | 45                 | 45                                          | 45                                                  | 45                                               |
| Eggerthella_change                  | Correlation Coefficient | ,146                      | ,022                       | -,180              | ,125                                        | ,102                                                | -,038                                            |
|                                     | Sig. (2-tailed)         | ,338                      | ,886                       | ,237               | ,412                                        | ,505                                                | ,804                                             |
|                                     | N                       | 45                        | 45                         | 45                 | 45                                          | 45                                                  | 45                                               |
| Erysipelatoclostridium_<br>change   | Correlation Coefficient | ,078                      | ,064                       | ,000               | ,156                                        | ,038                                                | ,060                                             |
|                                     | Sig. (2-tailed)         | ,613                      | ,676                       | ,999               | ,307                                        | ,803                                                | ,698                                             |
|                                     | N                       | 45                        | 45                         | 45                 | 45                                          | 45                                                  | 45                                               |
| Faecalitalea_change                 | Correlation Coefficient | -,141                     | ,039                       | -,038              | ,302                                        | -,074                                               | ,190                                             |
|                                     | Sig. (2-tailed)         | ,356                      | ,801                       | ,804               | ,044                                        | ,629                                                | ,211                                             |
|                                     | N                       | 45                        | 45                         | 45                 | 45                                          | 45                                                  | 45                                               |
| Family.XIII.AD3011.<br>group_change | Correlation Coefficient | -,048                     | ,090                       | -,018              | -,084                                       | -,026                                               | ,281                                             |
|                                     | Sig. (2-tailed)         | ,752                      | ,555                       | ,905               | ,585                                        | ,867                                                | ,062                                             |
|                                     | N                       | 45                        | 45                         | 45                 | 45                                          | 45                                                  | 45                                               |
| Family.XIII.UCG.<br>001_change      | Correlation Coefficient | -,280                     | -,025                      | ,070               | ,068                                        | -,256                                               | ,041                                             |
|                                     | Sig. (2-tailed)         | ,062                      | ,872                       | ,645               | ,655                                        | ,089                                                | ,791                                             |
|                                     | N                       | 45                        | 45                         | 45                 | 45                                          | 45                                                  | 45                                               |
| Gemella_change                      | Correlation Coefficient | -,146                     | ,072                       | -,274              | ,233                                        | ,000                                                | ,082                                             |
|                                     | Sig. (2-tailed)         | ,339                      | ,636                       | ,069               | ,123                                        | ,998                                                | ,594                                             |
|                                     | N                       | 45                        | 45                         | 45                 | 45                                          | 45                                                  | 45                                               |



## Correlations

|                                          | interaction_VTA<br>_change                 | interaction_rOF<br>C_change | interaction_rmO<br>FC_change | sumscore_GIQ<br>LI_change | Stool_frequenc<br>y_change | STGHRE_chan<br>ge |
|------------------------------------------|--------------------------------------------|-----------------------------|------------------------------|---------------------------|----------------------------|-------------------|
| Gordonibacter_change                     | Correlation Coefficient<br>Sig. (2-tailed) | ,025<br>,876                | ,044<br>,785                 | ,079<br>,614              | ,099<br>,526               | -,040<br>,803     |
|                                          | N                                          | 43                          | 40                           | 44                        | 43                         | 42                |
| Holdemania_change                        | Correlation Coefficient<br>Sig. (2-tailed) | -,083<br>,597               | ,049<br>,764                 | ,005<br>,972              | -,104<br>,505              | -,104<br>,514     |
|                                          | N                                          | 43                          | 40                           | 44                        | 43                         | 42                |
| Holdemania_change                        | Correlation Coefficient<br>Sig. (2-tailed) | -,116<br>,459               | -,259<br>,107                | -,195<br>,211             | -,016<br>,919              | ,015<br>,927      |
|                                          | N                                          | 43                          | 40                           | 44                        | 43                         | 42                |
| Lachnospiraceae.FCS020.<br>group_change  | Correlation Coefficient<br>Sig. (2-tailed) | -,041<br>,792               | -,079<br>,627                | ,028<br>,860              | ,133<br>,390               | -,078<br>,624     |
|                                          | N                                          | 43                          | 40                           | 44                        | 43                         | 42                |
| Lachnospiraceae.<br>NK4A136.group_change | Correlation Coefficient<br>Sig. (2-tailed) | ,286<br>,063                | -,093<br>,566                | -,001<br>,996             | -,013<br>,933              | ,094<br>,554      |
|                                          | N                                          | 43                          | 40                           | 43                        | 43                         | 42                |
| Lactiplantibacillus_change               | Correlation Coefficient<br>Sig. (2-tailed) | -,006<br>,972               | ,120<br>,459                 | ,397<br>,008              | -,007<br>,966              | ,131<br>,407      |
|                                          | N                                          | 43                          | 40                           | 44                        | 43                         | 42                |
| Lactobacillus_change                     | Correlation Coefficient<br>Sig. (2-tailed) | -,023<br>,882               | ,046<br>,778                 | -,054<br>,731             | ,105<br>,504               | -,070<br>,659     |
|                                          | N                                          | 43                          | 40                           | 43                        | 43                         | 42                |
| Libanicoccus_change                      | Correlation Coefficient<br>Sig. (2-tailed) | ,294<br>,056                | ,211<br>,192                 | ,223<br>,151              | -,057<br>,230              | -,107<br>,499     |
|                                          | N                                          | 43                          | 40                           | 43                        | 43                         | 42                |

## Correlations

|                                          |                         | STPYY_change | STGLPT_chan<br>ge | age   | BMI   | FM_stand | Richness | shannon.<br>effective |
|------------------------------------------|-------------------------|--------------|-------------------|-------|-------|----------|----------|-----------------------|
| Gordonibacter_change                     | Correlation Coefficient | -,341        | ,132              | ,239  | ,173  | ,090     | ,244     | ,257                  |
|                                          | Sig. (2-tailed)         | ,027         | ,404              | ,114  | ,257  | ,558     | ,107     | ,089                  |
|                                          | N                       | 42           | 42                | 45    | 45    | 45       | 45       | 45                    |
| Holdemanela_change                       | Correlation Coefficient | -,043        | ,166              | -,098 | ,079  | ,056     | ,303     | ,318                  |
|                                          | Sig. (2-tailed)         | ,785         | ,294              | ,523  | ,606  | ,713     | ,043     | ,033                  |
|                                          | N                       | 42           | 42                | 45    | 45    | 45       | 45       | 45                    |
| Holdmania_change                         | Correlation Coefficient | -,157        | -,266             | ,177  | ,284  | ,017     | ,395     | ,414                  |
|                                          | Sig. (2-tailed)         | ,321         | ,089              | ,245  | ,058  | ,911     | ,007     | ,005                  |
|                                          | N                       | 42           | 42                | 45    | 45    | 45       | 45       | 45                    |
| Lachnospiraceae.FCS020.<br>group_change  | Correlation Coefficient | ,076         | ,162              | -,187 | ,056  | -,044    | ,238     | ,193                  |
|                                          | Sig. (2-tailed)         | ,633         | ,307              | ,220  | ,713  | ,774     | ,115     | ,204                  |
|                                          | N                       | 42           | 42                | 45    | 45    | 45       | 45       | 45                    |
| Lachnospiraceae.<br>NK4A136.group_change | Correlation Coefficient | ,155         | -,079             | ,152  | ,109  | ,114     | ,177     | ,117                  |
|                                          | Sig. (2-tailed)         | ,326         | ,621              | ,319  | ,476  | ,454     | ,246     | ,443                  |
|                                          | N                       | 42           | 42                | 45    | 45    | 45       | 45       | 45                    |
| Lactiplantibacillus_change               | Correlation Coefficient | -,079        | -,186             | -,003 | -,024 | ,182     | -,214    | -,256                 |
|                                          | Sig. (2-tailed)         | ,618         | ,238              | ,986  | ,874  | ,231     | ,159     | ,090                  |
|                                          | N                       | 42           | 42                | 45    | 45    | 45       | 45       | 45                    |
| Lactobacillus_change                     | Correlation Coefficient | ,046         | -,181             | ,190  | -,043 | ,118     | -,278    | -,322                 |
|                                          | Sig. (2-tailed)         | ,771         | ,251              | ,212  | ,777  | ,440     | ,065     | ,031                  |
|                                          | N                       | 42           | 42                | 45    | 45    | 45       | 45       | 45                    |
| Libanicoccus_change                      | Correlation Coefficient | ,039         | ,115              | ,250  | ,042  | -,048    | ,110     | ,108                  |
|                                          | Sig. (2-tailed)         | ,807         | ,468              | ,098  | ,786  | ,753     | ,470     | ,481                  |
|                                          | N                       | 42           | 42                | 45    | 45    | 45       | 45       | 45                    |

## Correlations

|                                          |                         | simpson.<br>effective | Evenness | CHOL_change | LDL_change | shannon.<br>effective | Richness_chan<br>ge |
|------------------------------------------|-------------------------|-----------------------|----------|-------------|------------|-----------------------|---------------------|
| Gordonibacter_change                     | Correlation Coefficient | ,266                  | ,248     | ,192        | ,030       | ,213                  | ,319                |
|                                          | Sig. (2-tailed)         | ,077                  | ,101     | ,205        | ,847       | ,160                  | ,033                |
|                                          | N                       | 45                    | 45       | 45          | 45         | 45                    | 45                  |
| Holdemanella_change                      | Correlation Coefficient | ,357                  | ,092     | ,137        | ,119       | ,130                  | ,156                |
|                                          | Sig. (2-tailed)         | ,016                  | ,546     | ,369        | ,437       | ,395                  | ,305                |
|                                          | N                       | 45                    | 45       | 45          | 45         | 45                    | 45                  |
| Holdemania_change                        | Correlation Coefficient | ,438                  | ,206     | -,201       | -,187      | ,129                  | ,157                |
|                                          | Sig. (2-tailed)         | ,003                  | ,175     | ,186        | ,219       | ,400                  | ,304                |
|                                          | N                       | 45                    | 45       | 45          | 45         | 45                    | 45                  |
| Lachnospiraceae.FCS020.<br>group_change  | Correlation Coefficient | ,205                  | -,019    | ,182        | ,198       | ,090                  | ,105                |
|                                          | Sig. (2-tailed)         | ,178                  | ,903     | ,232        | ,193       | ,555                  | ,493                |
|                                          | N                       | 45                    | 45       | 45          | 45         | 45                    | 45                  |
| Lachnospiraceae.<br>NK4A136.group_change | Correlation Coefficient | ,108                  | -,153    | ,013        | ,030       | ,325                  | ,289                |
|                                          | Sig. (2-tailed)         | ,480                  | ,316     | ,933        | ,846       | ,029                  | ,055                |
|                                          | N                       | 45                    | 45       | 45          | 45         | 45                    | 45                  |
| Lactiplantibacillus_change               | Correlation Coefficient | -,284                 | -,172    | -,052       | -,114      | -,116                 | -,049               |
|                                          | Sig. (2-tailed)         | ,059                  | ,258     | ,735        | ,455       | ,446                  | ,751                |
|                                          | N                       | 45                    | 45       | 45          | 45         | 45                    | 45                  |
| Lactobacillus_change                     | Correlation Coefficient | -,340                 | -,226    | ,184        | ,255       | -,398                 | -,220               |
|                                          | Sig. (2-tailed)         | ,022                  | ,135     | ,225        | ,091       | ,007                  | ,147                |
|                                          | N                       | 45                    | 45       | 45          | 45         | 45                    | 45                  |
| Libanicoccus_change                      | Correlation Coefficient | ,007                  | -,031    | -,032       | -,003      | -,164                 | -,170               |
|                                          | Sig. (2-tailed)         | ,963                  | ,837     | ,834        | ,986       | ,281                  | ,264                |
|                                          | N                       | 45                    | 45       | 45          | 45         | 45                    | 45                  |

## Correlations

|                                          | Evenness_change                            | Actinomyces_change    | Aerostipes_change | Bifidobacterium_change | Blautia_change | Collinsella_change |
|------------------------------------------|--------------------------------------------|-----------------------|-------------------|------------------------|----------------|--------------------|
| Gordonibacter_change                     | Correlation Coefficient<br>Sig. (2-tailed) | -.097<br>,141<br>,357 | -.081<br>,595     | -.351<br>,018          | ,121<br>,427   | -.052<br>,737      |
|                                          | N                                          | 45                    | 45                | 45                     | 45             | 45                 |
| Holdemania_change                        | Correlation Coefficient<br>Sig. (2-tailed) | -.017<br>,911<br>,548 | ,068<br>,657      | -.172<br>,258          | ,251<br>,096   | ,071<br>,644       |
|                                          | N                                          | 45                    | 45                | 45                     | 45             | 45                 |
| Holdemania_change                        | Correlation Coefficient<br>Sig. (2-tailed) | ,045<br>,772<br>,028  | ,138<br>,366      | -.160<br>,294          | -.244<br>,106  | -.286<br>,057      |
|                                          | N                                          | 45                    | 45                | 45                     | 45             | 45                 |
| Lachnospiraceae.FCS020.<br>group_change  | Correlation Coefficient<br>Sig. (2-tailed) | ,062<br>,686<br>,592  | -.184<br>,227     | -.103<br>,499          | ,216<br>,154   | ,106<br>,489       |
|                                          | N                                          | 45                    | 45                | 45                     | 45             | 45                 |
| Lachnospiraceae.<br>NK4A136.group_change | Correlation Coefficient<br>Sig. (2-tailed) | ,138<br>,365<br>,300  | -.157<br>,302     | -.370<br>,012          | -.377<br>,011  | -.529<br>,000      |
|                                          | N                                          | 45                    | 45                | 45                     | 45             | 45                 |
| Lactiplantibacillus_change               | Correlation Coefficient<br>Sig. (2-tailed) | -.240<br>,112<br>,137 | -.043<br>,779     | ,360<br>,015           | ,258<br>,087   | ,286<br>,057       |
|                                          | N                                          | 45                    | 45                | 45                     | 45             | 45                 |
| Lactobacillus_change                     | Correlation Coefficient<br>Sig. (2-tailed) | -.370<br>,012<br>,519 | -.033<br>,828     | ,159<br>,297           | -.086<br>,575  | -.006<br>,969      |
|                                          | N                                          | 45                    | 45                | 45                     | 45             | 45                 |
| Libanicoccus_change                      | Correlation Coefficient<br>Sig. (2-tailed) | ,053<br>,732<br>,803  | ,071<br>,643      | ,153<br>,315           | ,051<br>,741   | ,077<br>,614       |
|                                          | N                                          | 45                    | 45                | 45                     | 45             | 45                 |

## Correlations

|                                          |                         | Desulfovibrio_c<br>hange | Eggerthella_ch<br>ange | Erysipelatoclost<br>ridium_change | Faecalitalea_ch<br>ange | Family.XIII.<br>AD3011.<br>group_change | Family.XIII.<br>UCG.<br>001_change |
|------------------------------------------|-------------------------|--------------------------|------------------------|-----------------------------------|-------------------------|-----------------------------------------|------------------------------------|
| Gordonibacter_change                     | Correlation Coefficient | -,078                    | ,384                   | ,224                              | ,183                    | -,040                                   | -,023                              |
|                                          | Sig. (2-tailed)         | ,610                     | ,009                   | ,140                              | ,230                    | ,792                                    | ,879                               |
|                                          | N                       | 45                       | 45                     | 45                                | 45                      | 45                                      | 45                                 |
| Holdemanella_change                      | Correlation Coefficient | -,030                    | ,098                   | ,088                              | ,085                    | ,227                                    | -,114                              |
|                                          | Sig. (2-tailed)         | ,845                     | ,521                   | ,566                              | ,581                    | ,134                                    | ,458                               |
|                                          | N                       | 45                       | 45                     | 45                                | 45                      | 45                                      | 45                                 |
| Holdemania_change                        | Correlation Coefficient | ,003                     | ,139                   | -,060                             | ,040                    | -,016                                   | ,170                               |
|                                          | Sig. (2-tailed)         | ,986                     | ,362                   | ,694                              | ,794                    | ,916                                    | ,263                               |
|                                          | N                       | 45                       | 45                     | 45                                | 45                      | 45                                      | 45                                 |
| Lachnospiraceae.FCS020.<br>group_change  | Correlation Coefficient | -,042                    | ,020                   | ,162                              | -,221                   | ,038                                    | ,064                               |
|                                          | Sig. (2-tailed)         | ,782                     | ,897                   | ,288                              | ,145                    | ,802                                    | ,676                               |
|                                          | N                       | 45                       | 45                     | 45                                | 45                      | 45                                      | 45                                 |
| Lachnospiraceae.<br>NK4A136.group_change | Correlation Coefficient | -,024                    | -,054                  | ,052                              | -,278                   | ,335                                    | ,207                               |
|                                          | Sig. (2-tailed)         | ,873                     | ,727                   | ,736                              | ,064                    | ,024                                    | ,172                               |
|                                          | N                       | 45                       | 45                     | 45                                | 45                      | 45                                      | 45                                 |
| Lactiplantibacillus_change               | Correlation Coefficient | -,018                    | -,150                  | -,149                             | -,141                   | ,185                                    | -,151                              |
|                                          | Sig. (2-tailed)         | ,905                     | ,326                   | ,329                              | ,355                    | ,224                                    | ,322                               |
|                                          | N                       | 45                       | 45                     | 45                                | 45                      | 45                                      | 45                                 |
| Lactobacillus_change                     | Correlation Coefficient | ,201                     | ,141                   | -,121                             | ,157                    | -,149                                   | ,058                               |
|                                          | Sig. (2-tailed)         | ,186                     | ,356                   | ,430                              | ,303                    | ,330                                    | ,705                               |
|                                          | N                       | 45                       | 45                     | 45                                | 45                      | 45                                      | 45                                 |
| Libanicoccus_change                      | Correlation Coefficient | ,338                     | ,069                   | ,019                              | ,072                    | -,323                                   | -,146                              |
|                                          | Sig. (2-tailed)         | ,023                     | ,652                   | ,903                              | ,638                    | ,031                                    | ,337                               |
|                                          | N                       | 45                       | 45                     | 45                                | 45                      | 45                                      | 45                                 |

## Correlations

|                                          |                         | Gemella_chang<br>e | Gordonibacter_<br>change | Holdemanella_<br>change | Holdemania_<br>change | Lachnospiraceae.FCS020.<br>group_change | Lachnospiraceae.NK4A136.<br>group_change |
|------------------------------------------|-------------------------|--------------------|--------------------------|-------------------------|-----------------------|-----------------------------------------|------------------------------------------|
| Gordonibacter_change                     | Correlation Coefficient | ,128               | 1,000                    | ,166                    | ,164                  | -,040                                   | ,003                                     |
|                                          | Sig. (2-tailed)         | ,402               | .                        | ,275                    | ,283                  | ,792                                    | ,985                                     |
|                                          | N                       | 45                 | 45                       | 45                      | 45                    | 45                                      | 45                                       |
| Holdemanella_change                      | Correlation Coefficient | ,330               | ,166                     | 1,000                   | ,013                  | ,367                                    | -,336                                    |
|                                          | Sig. (2-tailed)         | ,027               | ,275                     | .                       | ,934                  | ,013                                    | ,024                                     |
|                                          | N                       | 45                 | 45                       | 45                      | 45                    | 45                                      | 45                                       |
| Holdemania_change                        | Correlation Coefficient | -,465              | ,164                     | ,013                    | 1,000                 | -,172                                   | ,161                                     |
|                                          | Sig. (2-tailed)         | ,001               | ,283                     | ,934                    | .                     | ,257                                    | ,290                                     |
|                                          | N                       | 45                 | 45                       | 45                      | 45                    | 45                                      | 45                                       |
| Lachnospiraceae.FCS020.<br>group_change  | Correlation Coefficient | ,300               | -,040                    | ,367                    | -,172                 | 1,000                                   | -,205                                    |
|                                          | Sig. (2-tailed)         | ,045               | ,792                     | ,013                    | ,257                  | .                                       | ,177                                     |
|                                          | N                       | 45                 | 45                       | 45                      | 45                    | 45                                      | 45                                       |
| Lachnospiraceae.<br>NK4A136.group_change | Correlation Coefficient | -,431              | ,003                     | -,336                   | ,161                  | -,205                                   | 1,000                                    |
|                                          | Sig. (2-tailed)         | ,003               | ,985                     | ,024                    | ,290                  | ,177                                    | .                                        |
|                                          | N                       | 45                 | 45                       | 45                      | 45                    | 45                                      | 45                                       |
| Lactiplantibacillus_change               | Correlation Coefficient | ,304               | -,077                    | ,033                    | -,103                 | ,056                                    | -,185                                    |
|                                          | Sig. (2-tailed)         | ,043               | ,617                     | ,831                    | ,500                  | ,713                                    | ,225                                     |
|                                          | N                       | 45                 | 45                       | 45                      | 45                    | 45                                      | 45                                       |
| Lactobacillus_change                     | Correlation Coefficient | ,020               | -,064                    | -,100                   | -,023                 | -,047                                   | -,079                                    |
|                                          | Sig. (2-tailed)         | ,899               | ,677                     | ,515                    | ,879                  | ,757                                    | ,604                                     |
|                                          | N                       | 45                 | 45                       | 45                      | 45                    | 45                                      | 45                                       |
| Libanicoccus_change                      | Correlation Coefficient | ,122               | ,034                     | -,152                   | ,160                  | -,142                                   | -,229                                    |
|                                          | Sig. (2-tailed)         | ,424               | ,822                     | ,319                    | ,292                  | ,353                                    | ,130                                     |
|                                          | N                       | 45                 | 45                       | 45                      | 45                    | 45                                      | 45                                       |

## Correlations

|                                      |                         | Lactiplantibacillus_change | Lactobacillus_change | Libanicoccus_change | Ligilactobacillus_change | Limosilactobacillus_change | Roseburia_change |
|--------------------------------------|-------------------------|----------------------------|----------------------|---------------------|--------------------------|----------------------------|------------------|
| Gordonibacter_change                 | Correlation Coefficient | -.077                      | -.064                | ,034                | -,110                    | ,153                       | -,032            |
|                                      | Sig. (2-tailed)         | ,617                       | ,677                 | ,822                | ,471                     | ,316                       | ,834             |
|                                      | N                       | 45                         | 45                   | 45                  | 45                       | 45                         | 45               |
| Holdemania_change                    | Correlation Coefficient | ,033                       | -,100                | -,152               | -,017                    | ,005                       | -,121            |
|                                      | Sig. (2-tailed)         | ,831                       | ,515                 | ,319                | ,914                     | ,972                       | ,429             |
|                                      | N                       | 45                         | 45                   | 45                  | 45                       | 45                         | 45               |
| Holdemania_change                    | Correlation Coefficient | -,103                      | -,023                | ,160                | ,046                     | ,031                       | ,134             |
|                                      | Sig. (2-tailed)         | ,500                       | ,879                 | ,292                | ,766                     | ,841                       | ,379             |
|                                      | N                       | 45                         | 45                   | 45                  | 45                       | 45                         | 45               |
| Lachnospiraceae.FCS020.group_change  | Correlation Coefficient | ,056                       | -,047                | -,142               | ,232                     | -,109                      | -,294            |
|                                      | Sig. (2-tailed)         | ,713                       | ,757                 | ,353                | ,125                     | ,478                       | ,050             |
|                                      | N                       | 45                         | 45                   | 45                  | 45                       | 45                         | 45               |
| Lachnospiraceae.NK4A136.group_change | Correlation Coefficient | -,185                      | -,079                | -,229               | -,276                    | -,141                      | ,128             |
|                                      | Sig. (2-tailed)         | ,225                       | ,604                 | ,130                | ,066                     | ,355                       | ,401             |
|                                      | N                       | 45                         | 45                   | 45                  | 45                       | 45                         | 45               |
| Lactiplantibacillus_change           | Correlation Coefficient | 1,000                      | -,039                | -,036               | ,077                     | ,124                       | -,116            |
|                                      | Sig. (2-tailed)         | .                          | ,801                 | ,814                | ,615                     | ,416                       | ,447             |
|                                      | N                       | 45                         | 45                   | 45                  | 45                       | 45                         | 45               |
| Lactobacillus_change                 | Correlation Coefficient | -,039                      | 1,000                | ,186                | ,068                     | ,364                       | -,085            |
|                                      | Sig. (2-tailed)         | ,801                       | .                    | ,220                | ,659                     | ,014                       | ,580             |
|                                      | N                       | 45                         | 45                   | 45                  | 45                       | 45                         | 45               |
| Libanicoccus_change                  | Correlation Coefficient | -,036                      | ,186                 | 1,000               | -,038                    | ,060                       | -,058            |
|                                      | Sig. (2-tailed)         | ,814                       | ,220                 | .                   | ,806                     | ,696                       | ,705             |
|                                      | N                       | 45                         | 45                   | 45                  | 45                       | 45                         | 45               |

## Correlations

|                                          |                         | Shuttleworthia_<br>change | Subdoligranulu<br>m_change | UCG.<br>003_change | Xi.Eubacterium..<br>brachy.<br>group_change | X.<br>Ruminococcus.<br>.gauvreauii.<br>group_change | X.<br>Ruminococcus.<br>.torques.<br>group_change |
|------------------------------------------|-------------------------|---------------------------|----------------------------|--------------------|---------------------------------------------|-----------------------------------------------------|--------------------------------------------------|
| Gordonibacter_change                     | Correlation Coefficient | ,055                      | ,172                       | ,223               | ,415                                        | -,214                                               | -,156                                            |
|                                          | Sig. (2-tailed)         | ,720                      | ,258                       | ,141               | ,005                                        | ,158                                                | ,305                                             |
|                                          | N                       | 45                        | 45                         | 45                 | 45                                          | 45                                                  | 45                                               |
| Holdemania_change                        | Correlation Coefficient | -,001                     | -,056                      | -,306              | ,278                                        | -,057                                               | ,204                                             |
|                                          | Sig. (2-tailed)         | ,996                      | ,714                       | ,041               | ,064                                        | ,709                                                | ,179                                             |
|                                          | N                       | 45                        | 45                         | 45                 | 45                                          | 45                                                  | 45                                               |
| Holdemania_change                        | Correlation Coefficient | ,144                      | -,059                      | ,323               | ,009                                        | -,214                                               | -,192                                            |
|                                          | Sig. (2-tailed)         | ,346                      | ,702                       | ,030               | ,953                                        | ,158                                                | ,206                                             |
|                                          | N                       | 45                        | 45                         | 45                 | 45                                          | 45                                                  | 45                                               |
| Lachnospiraceae.FCS020.<br>group_change  | Correlation Coefficient | -,029                     | ,214                       | -,251              | ,108                                        | -,127                                               | ,105                                             |
|                                          | Sig. (2-tailed)         | ,848                      | ,158                       | ,096               | ,478                                        | ,405                                                | ,493                                             |
|                                          | N                       | 45                        | 45                         | 45                 | 45                                          | 45                                                  | 45                                               |
| Lachnospiraceae.<br>NK4A136.group_change | Correlation Coefficient | ,009                      | -,050                      | ,227               | -,157                                       | ,083                                                | -,207                                            |
|                                          | Sig. (2-tailed)         | ,954                      | ,745                       | ,133               | ,303                                        | ,587                                                | ,173                                             |
|                                          | N                       | 45                        | 45                         | 45                 | 45                                          | 45                                                  | 45                                               |
| Lactiplantibacillus_change               | Correlation Coefficient | ,071                      | -,040                      | -,063              | -,026                                       | ,178                                                | -,047                                            |
|                                          | Sig. (2-tailed)         | ,645                      | ,795                       | ,680               | ,865                                        | ,241                                                | ,760                                             |
|                                          | N                       | 45                        | 45                         | 45                 | 45                                          | 45                                                  | 45                                               |
| Lactobacillus_change                     | Correlation Coefficient | ,103                      | -,337                      | -,049              | -,032                                       | ,044                                                | -,111                                            |
|                                          | Sig. (2-tailed)         | ,502                      | ,024                       | ,748               | ,837                                        | ,773                                                | ,466                                             |
|                                          | N                       | 45                        | 45                         | 45                 | 45                                          | 45                                                  | 45                                               |
| Libanicoccus_change                      | Correlation Coefficient | -,018                     | -,245                      | ,026               | ,087                                        | -,159                                               | -,241                                            |
|                                          | Sig. (2-tailed)         | ,909                      | ,105                       | ,863               | ,568                                        | ,297                                                | ,110                                             |
|                                          | N                       | 45                        | 45                         | 45                 | 45                                          | 45                                                  | 45                                               |



## Correlations

|                                             | interaction_VTA<br>_change                      | interaction_rOF<br>C_change | interaction_rmO<br>FC_change | sumscore_GIQ<br>LI_change | Stool_frequenc<br>y_change | STGHRE_chan<br>ge   |
|---------------------------------------------|-------------------------------------------------|-----------------------------|------------------------------|---------------------------|----------------------------|---------------------|
| Ligilactobacillus_change                    | Correlation Coefficient<br>Sig. (2-tailed)<br>N | -,175<br>,521<br>43         | -,105<br>,603<br>43          | -,082<br>,727<br>44       | ,054<br>,703<br>43         | -,017<br>,914<br>42 |
| Limosilactobacillus_change                  | Correlation Coefficient<br>Sig. (2-tailed)<br>N | -,010<br>,949<br>43         | -,005<br>,976<br>40          | -,070<br>,654<br>43       | ,058<br>,706<br>44         | -,196<br>,212<br>42 |
| Roseburia_change                            | Correlation Coefficient<br>Sig. (2-tailed)<br>N | ,137<br>,380<br>43          | ,146<br>,369<br>40           | -,011<br>,944<br>43       | ,025<br>,870<br>44         | -,209<br>,184<br>42 |
| Shuttleworthia_change                       | Correlation Coefficient<br>Sig. (2-tailed)<br>N | ,191<br>,220<br>43          | -,155<br>,338<br>40          | ,032<br>,838<br>43        | ,210<br>,172<br>44         | -,164<br>,300<br>42 |
| Subdoligranulum_change                      | Correlation Coefficient<br>Sig. (2-tailed)<br>N | -,384<br>,011<br>43         | -,159<br>,329<br>40          | -,015<br>,922<br>43       | ,261<br>,087<br>44         | ,279<br>,073<br>42  |
| UCG.003_change                              | Correlation Coefficient<br>Sig. (2-tailed)<br>N | ,185<br>,236<br>43          | ,122<br>,453<br>40           | -,094<br>,551<br>43       | -,255<br>,095<br>44        | -,059<br>,711<br>42 |
| X.Eubacterium..brachy.<br>group_change      | Correlation Coefficient<br>Sig. (2-tailed)<br>N | ,115<br>,464<br>43          | -,177<br>,275<br>40          | ,038<br>,809<br>43        | ,090<br>,561<br>44         | -,097<br>,540<br>42 |
| X.Ruminococcus..<br>gavreauuii.group_change | Correlation Coefficient<br>Sig. (2-tailed)<br>N | -,194<br>,211<br>43         | -,143<br>,377<br>40          | -,024<br>,879<br>43       | ,113<br>,465<br>44         | -,100<br>,528<br>42 |

## Correlations

|                                           |                         | STPYY_change | STGLPT_chan<br>ge | age   | BMI   | FM_stand | Richness | shannon.<br>effective |
|-------------------------------------------|-------------------------|--------------|-------------------|-------|-------|----------|----------|-----------------------|
| Ligilactobacillus_change                  | Correlation Coefficient | ,015         | ,038              | -,220 | ,072  | -,144    | -,045    | ,004                  |
|                                           | Sig. (2-tailed)         | ,924         | ,813              | ,146  | ,637  | ,345     | ,768     | ,979                  |
|                                           | N                       | 42           | 42                | 45    | 45    | 45       | 45       | 45                    |
| Limosilactobacillus_change                | Correlation Coefficient | ,027         | -,182             | ,280  | -,257 | -,212    | -,141    | -,098                 |
|                                           | Sig. (2-tailed)         | ,864         | ,248              | ,062  | ,088  | ,162     | ,354     | ,523                  |
|                                           | N                       | 42           | 42                | 45    | 45    | 45       | 45       | 45                    |
| Roseburia_change                          | Correlation Coefficient | -,048        | -,035             | ,323  | -,120 | ,182     | ,123     | ,096                  |
|                                           | Sig. (2-tailed)         | ,763         | ,824              | ,030  | ,434  | ,232     | ,419     | ,532                  |
|                                           | N                       | 42           | 42                | 45    | 45    | 45       | 45       | 45                    |
| Shuttleworthia_change                     | Correlation Coefficient | -,068        | -,074             | -,034 | ,016  | ,312     | -,034    | -,090                 |
|                                           | Sig. (2-tailed)         | ,669         | ,644              | ,825  | ,915  | ,037     | ,826     | ,556                  |
|                                           | N                       | 42           | 42                | 45    | 45    | 45       | 45       | 45                    |
| Subdoligranulum_change                    | Correlation Coefficient | -,210        | ,009              | -,033 | ,175  | -,188    | -,033    | ,008                  |
|                                           | Sig. (2-tailed)         | ,182         | ,957              | ,827  | ,252  | ,216     | ,831     | ,956                  |
|                                           | N                       | 42           | 42                | 45    | 45    | 45       | 45       | 45                    |
| UCG.003_change                            | Correlation Coefficient | -,176        | -,165             | ,072  | ,239  | ,208     | ,052     | ,083                  |
|                                           | Sig. (2-tailed)         | ,264         | ,296              | ,638  | ,113  | ,170     | ,736     | ,587                  |
|                                           | N                       | 42           | 42                | 45    | 45    | 45       | 45       | 45                    |
| X.Eubacterium..brachy.<br>group_change    | Correlation Coefficient | -,061        | ,179              | -,090 | -,048 | ,150     | ,244     | ,227                  |
|                                           | Sig. (2-tailed)         | ,702         | ,256              | ,554  | ,753  | ,324     | ,106     | ,133                  |
|                                           | N                       | 42           | 42                | 45    | 45    | 45       | 45       | 45                    |
| X.Ruminococcus..<br>gavreaii.group_change | Correlation Coefficient | -,063        | -,159             | ,071  | -,050 | ,196     | -,346    | -,288                 |
|                                           | Sig. (2-tailed)         | ,693         | ,314              | ,642  | ,744  | ,196     | ,020     | ,055                  |
|                                           | N                       | 42           | 42                | 45    | 45    | 45       | 45       | 45                    |

## Correlations

|                                           |                         | simpson.<br>effective | Evenness | CHOL_change | LDL_change | shannon.<br>effective | Richness_change |
|-------------------------------------------|-------------------------|-----------------------|----------|-------------|------------|-----------------------|-----------------|
| Ligilactobacillus_change                  | Correlation Coefficient | ,017                  | ,145     | -,061       | ,011       | ,006                  | -,101           |
|                                           | Sig. (2-tailed)         | ,914                  | ,342     | ,689        | ,941       | ,969                  | ,508            |
|                                           | N                       | 45                    | 45       | 45          | 45         | 45                    | 45              |
| Limosilactobacillus_change                | Correlation Coefficient | -,108                 | ,031     | -,076       | -,056      | ,038                  | ,025            |
|                                           | Sig. (2-tailed)         | ,480                  | ,839     | ,622        | ,713       | ,803                  | ,872            |
|                                           | N                       | 45                    | 45       | 45          | 45         | 45                    | 45              |
| Roseburia_change                          | Correlation Coefficient | ,054                  | -,126    | ,028        | -,021      | ,107                  | ,211            |
|                                           | Sig. (2-tailed)         | ,726                  | ,409     | ,857        | ,893       | ,485                  | ,165            |
|                                           | N                       | 45                    | 45       | 45          | 45         | 45                    | 45              |
| Shuttleworthia_change                     | Correlation Coefficient | -,080                 | -,186    | ,155        | ,231       | -,047                 | ,056            |
|                                           | Sig. (2-tailed)         | ,603                  | ,222     | ,308        | ,126       | ,758                  | ,717            |
|                                           | N                       | 45                    | 45       | 45          | 45         | 45                    | 45              |
| Subdoligranulum_change                    | Correlation Coefficient | ,101                  | ,322     | -,110       | -,104      | ,162                  | ,054            |
|                                           | Sig. (2-tailed)         | ,511                  | ,031     | ,473        | ,496       | ,288                  | ,722            |
|                                           | N                       | 45                    | 45       | 45          | 45         | 45                    | 45              |
| UCG.003_change                            | Correlation Coefficient | ,035                  | ,030     | ,006        | -,018      | ,051                  | ,088            |
|                                           | Sig. (2-tailed)         | ,818                  | ,844     | ,971        | ,907       | ,738                  | ,567            |
|                                           | N                       | 45                    | 45       | 45          | 45         | 45                    | 45              |
| X.Eubacterium..brachy.<br>group_change    | Correlation Coefficient | ,229                  | ,073     | ,000        | -,050      | ,281                  | ,364            |
|                                           | Sig. (2-tailed)         | ,130                  | ,632     | 1,000       | ,745       | ,061                  | ,014            |
|                                           | N                       | 45                    | 45       | 45          | 45         | 45                    | 45              |
| X.Ruminococcus..<br>gavreaii.group_change | Correlation Coefficient | -,249                 | ,176     | ,241        | ,241       | ,010                  | -,028           |
|                                           | Sig. (2-tailed)         | ,099                  | ,247     | ,110        | ,111       | ,950                  | ,854            |
|                                           | N                       | 45                    | 45       | 45          | 45         | 45                    | 45              |

## Correlations

|                                        |                         | Evenness_change | Actinomyces_change | Aerostipes_change | Bifidobacterium_change | Blautia_change | Collinsella_change |
|----------------------------------------|-------------------------|-----------------|--------------------|-------------------|------------------------|----------------|--------------------|
| Ligilactobacillus_change               | Correlation Coefficient | ,320            | ,003               | -,024             | ,072                   | ,133           | ,218               |
|                                        | Sig. (2-tailed)         | ,032            | ,982               | ,874              | ,640                   | ,384           | ,150               |
|                                        | N                       | 45              | 45                 | 45                | 45                     | 45             | 45                 |
| Limosilactobacillus_change             | Correlation Coefficient | -,008           | -,038              | ,228              | ,077                   | ,093           | ,132               |
|                                        | Sig. (2-tailed)         | ,958            | ,806               | ,132              | ,616                   | ,542           | ,388               |
|                                        | N                       | 45              | 45                 | 45                | 45                     | 45             | 45                 |
| Roseburia_change                       | Correlation Coefficient | -,188           | -,040              | -,111             | ,142                   | -,313          | -,219              |
|                                        | Sig. (2-tailed)         | ,216            | ,792               | ,468              | ,353                   | ,037           | ,149               |
|                                        | N                       | 45              | 45                 | 45                | 45                     | 45             | 45                 |
| Shuttleworthia_change                  | Correlation Coefficient | -,228           | -,089              | -,052             | ,255                   | -,246          | ,092               |
|                                        | Sig. (2-tailed)         | ,132            | ,561               | ,735              | ,091                   | ,104           | ,546               |
|                                        | N                       | 45              | 45                 | 45                | 45                     | 45             | 45                 |
| Subdoligranulum_change                 | Correlation Coefficient | ,348            | ,121               | ,163              | -,264                  | ,239           | ,025               |
|                                        | Sig. (2-tailed)         | ,019            | ,428               | ,285              | ,079                   | ,114           | ,869               |
|                                        | N                       | 45              | 45                 | 45                | 45                     | 45             | 45                 |
| UCG.003_change                         | Correlation Coefficient | -,141           | -,185              | -,084             | -,189                  | -,396          | -,109              |
|                                        | Sig. (2-tailed)         | ,357            | ,225               | ,582              | ,215                   | ,007           | ,474               |
|                                        | N                       | 45              | 45                 | 45                | 45                     | 45             | 45                 |
| X.Eubacterium..brachy.group_change     | Correlation Coefficient | -,061           | ,205               | ,134              | -,085                  | ,195           | -,063              |
|                                        | Sig. (2-tailed)         | ,689            | ,178               | ,381              | ,580                   | ,199           | ,682               |
|                                        | N                       | 45              | 45                 | 45                | 45                     | 45             | 45                 |
| X.Ruminococcus..gauvreaii.group_change | Correlation Coefficient | ,121            | ,018               | -,190             | ,233                   | ,209           | ,005               |
|                                        | Sig. (2-tailed)         | ,428            | ,908               | ,211              | ,124                   | ,169           | ,976               |
|                                        | N                       | 45              | 45                 | 45                | 45                     | 45             | 45                 |

## Correlations

|                                             |                         | Desulfovibrio_c<br>hange | Eggerthella_ch<br>ange | Erysipelatoclost<br>ridium_change | Faecalitalea_ch<br>ange | Family.XIII.<br>AD3011.<br>group_change | Family.XIII.<br>UCG.<br>001_change |
|---------------------------------------------|-------------------------|--------------------------|------------------------|-----------------------------------|-------------------------|-----------------------------------------|------------------------------------|
| Ligilactobacillus_change                    | Correlation Coefficient | -,054                    | -,030                  | ,245                              | -,043                   | ,035                                    | ,222                               |
|                                             | Sig. (2-tailed)         | ,725                     | ,845                   | ,104                              | ,778                    | ,821                                    | ,142                               |
|                                             | N                       | 45                       | 45                     | 45                                | 45                      | 45                                      | 45                                 |
| Limosilactobacillus_change                  | Correlation Coefficient | ,258                     | -,057                  | -,069                             | ,036                    | -,104                                   | ,128                               |
|                                             | Sig. (2-tailed)         | ,087                     | ,712                   | ,652                              | ,812                    | ,496                                    | ,402                               |
|                                             | N                       | 45                       | 45                     | 45                                | 45                      | 45                                      | 45                                 |
| Roseburia_change                            | Correlation Coefficient | ,130                     | -,037                  | ,107                              | ,126                    | -,224                                   | ,120                               |
|                                             | Sig. (2-tailed)         | ,393                     | ,807                   | ,484                              | ,411                    | ,139                                    | ,432                               |
|                                             | N                       | 45                       | 45                     | 45                                | 45                      | 45                                      | 45                                 |
| Shuttleworthia_change                       | Correlation Coefficient | ,020                     | ,146                   | ,078                              | -,141                   | -,048                                   | -,280                              |
|                                             | Sig. (2-tailed)         | ,894                     | ,338                   | ,613                              | ,356                    | ,752                                    | ,062                               |
|                                             | N                       | 45                       | 45                     | 45                                | 45                      | 45                                      | 45                                 |
| Subdoligranulum_change                      | Correlation Coefficient | -,113                    | ,022                   | ,064                              | ,039                    | ,090                                    | -,025                              |
|                                             | Sig. (2-tailed)         | ,462                     | ,886                   | ,676                              | ,801                    | ,555                                    | ,872                               |
|                                             | N                       | 45                       | 45                     | 45                                | 45                      | 45                                      | 45                                 |
| UCG.003_change                              | Correlation Coefficient | -,052                    | -,180                  | ,000                              | -,038                   | -,018                                   | ,070                               |
|                                             | Sig. (2-tailed)         | ,735                     | ,237                   | ,999                              | ,804                    | ,905                                    | ,645                               |
|                                             | N                       | 45                       | 45                     | 45                                | 45                      | 45                                      | 45                                 |
| X.Eubacterium..brachy.<br>group_change      | Correlation Coefficient | ,100                     | ,125                   | ,156                              | ,302                    | -,084                                   | ,068                               |
|                                             | Sig. (2-tailed)         | ,513                     | ,412                   | ,307                              | ,044                    | ,585                                    | ,655                               |
|                                             | N                       | 45                       | 45                     | 45                                | 45                      | 45                                      | 45                                 |
| X.Ruminococcus..<br>gavreauuii.group_change | Correlation Coefficient | -,043                    | ,102                   | ,038                              | -,074                   | -,026                                   | -,256                              |
|                                             | Sig. (2-tailed)         | ,778                     | ,505                   | ,803                              | ,629                    | ,867                                    | ,089                               |
|                                             | N                       | 45                       | 45                     | 45                                | 45                      | 45                                      | 45                                 |

## Correlations

|                                             |                         | Gemella_chang<br>e | Gordoniibacter_<br>change | Holdemanella_<br>change | Holdemania_ch<br>ange | Lachnospiracea<br>e.FCS020.<br>group_change | Lachnospiracea<br>e.NK4A136.<br>group_change |
|---------------------------------------------|-------------------------|--------------------|---------------------------|-------------------------|-----------------------|---------------------------------------------|----------------------------------------------|
| Ligilactobacillus_change                    | Correlation Coefficient | ,093               | -,110                     | -,017                   | ,046                  | ,232                                        | -,276                                        |
|                                             | Sig. (2-tailed)         | ,545               | ,471                      | ,914                    | ,766                  | ,125                                        | ,066                                         |
|                                             | N                       | 45                 | 45                        | 45                      | 45                    | 45                                          | 45                                           |
| Limosilactobacillus_change                  | Correlation Coefficient | ,253               | ,153                      | ,005                    | ,031                  | -,109                                       | -,141                                        |
|                                             | Sig. (2-tailed)         | ,094               | ,316                      | ,972                    | ,841                  | ,478                                        | ,355                                         |
|                                             | N                       | 45                 | 45                        | 45                      | 45                    | 45                                          | 45                                           |
| Roseburia_change                            | Correlation Coefficient | -,094              | -,032                     | -,121                   | ,134                  | -,294                                       | ,128                                         |
|                                             | Sig. (2-tailed)         | ,541               | ,834                      | ,429                    | ,379                  | ,050                                        | ,401                                         |
|                                             | N                       | 45                 | 45                        | 45                      | 45                    | 45                                          | 45                                           |
| Shuttleworthia_change                       | Correlation Coefficient | -,146              | ,055                      | -,001                   | ,144                  | -,029                                       | ,009                                         |
|                                             | Sig. (2-tailed)         | ,339               | ,720                      | ,996                    | ,346                  | ,848                                        | ,954                                         |
|                                             | N                       | 45                 | 45                        | 45                      | 45                    | 45                                          | 45                                           |
| Subdoligranulum_change                      | Correlation Coefficient | ,072               | ,172                      | -,056                   | -,059                 | ,214                                        | -,050                                        |
|                                             | Sig. (2-tailed)         | ,636               | ,258                      | ,714                    | ,702                  | ,158                                        | ,745                                         |
|                                             | N                       | 45                 | 45                        | 45                      | 45                    | 45                                          | 45                                           |
| UCG.003_change                              | Correlation Coefficient | -,274              | ,223                      | -,306                   | ,323                  | -,251                                       | ,227                                         |
|                                             | Sig. (2-tailed)         | ,069               | ,141                      | ,041                    | ,030                  | ,096                                        | ,133                                         |
|                                             | N                       | 45                 | 45                        | 45                      | 45                    | 45                                          | 45                                           |
| X.Eubacterium..brachy.<br>group_change      | Correlation Coefficient | ,233               | ,415                      | ,278                    | ,009                  | ,108                                        | -,157                                        |
|                                             | Sig. (2-tailed)         | ,123               | ,005                      | ,064                    | ,953                  | ,478                                        | ,303                                         |
|                                             | N                       | 45                 | 45                        | 45                      | 45                    | 45                                          | 45                                           |
| X.Ruminococcus..<br>gauvreauii.group_change | Correlation Coefficient | ,000               | -,214                     | -,057                   | -,214                 | -,127                                       | ,083                                         |
|                                             | Sig. (2-tailed)         | ,998               | ,158                      | ,709                    | ,158                  | ,405                                        | ,587                                         |
|                                             | N                       | 45                 | 45                        | 45                      | 45                    | 45                                          | 45                                           |

## Correlations

|                                       |                         | Lactiplantibacillus_change | Lactobacillus_c_hange | Libanicoccus_c_hange | Ligilactobacillus_change | Limosilactobacillus_change | Roseburia_change |
|---------------------------------------|-------------------------|----------------------------|-----------------------|----------------------|--------------------------|----------------------------|------------------|
| Ligilactobacillus_change              | Correlation Coefficient | ,077                       | ,068                  | -,038                | 1,000                    | ,039                       | -,232            |
|                                       | Sig. (2-tailed)         | ,615                       | ,659                  | ,806                 | .                        | ,799                       | ,125             |
|                                       | N                       | 45                         | 45                    | 45                   | 45                       | 45                         | 45               |
| Limosilactobacillus_change            | Correlation Coefficient | ,124                       | ,364                  | ,060                 | ,039                     | 1,000                      | ,063             |
|                                       | Sig. (2-tailed)         | ,416                       | ,014                  | ,696                 | ,799                     | .                          | ,681             |
|                                       | N                       | 45                         | 45                    | 45                   | 45                       | 45                         | 45               |
| Roseburia_change                      | Correlation Coefficient | -,116                      | -,085                 | -,058                | -,232                    | ,063                       | 1,000            |
|                                       | Sig. (2-tailed)         | ,447                       | ,580                  | ,705                 | ,125                     | ,681                       | .                |
|                                       | N                       | 45                         | 45                    | 45                   | 45                       | 45                         | 45               |
| Shuttleworthia_change                 | Correlation Coefficient | ,071                       | ,103                  | -,018                | -,075                    | ,067                       | ,080             |
|                                       | Sig. (2-tailed)         | ,645                       | ,502                  | ,909                 | ,623                     | ,661                       | ,603             |
|                                       | N                       | 45                         | 45                    | 45                   | 45                       | 45                         | 45               |
| Subdoligranulum_change                | Correlation Coefficient | -,040                      | -,337                 | -,245                | ,258                     | -,188                      | -,247            |
|                                       | Sig. (2-tailed)         | ,795                       | ,024                  | ,105                 | ,088                     | ,217                       | ,102             |
|                                       | N                       | 45                         | 45                    | 45                   | 45                       | 45                         | 45               |
| UCG.003_change                        | Correlation Coefficient | -,063                      | -,049                 | ,026                 | -,174                    | -,070                      | ,239             |
|                                       | Sig. (2-tailed)         | ,680                       | ,748                  | ,863                 | ,253                     | ,648                       | ,114             |
|                                       | N                       | 45                         | 45                    | 45                   | 45                       | 45                         | 45               |
| X.Eubacterium..brachy.group_change    | Correlation Coefficient | -,026                      | -,032                 | ,087                 | -,023                    | ,038                       | -,006            |
|                                       | Sig. (2-tailed)         | ,865                       | ,837                  | ,568                 | ,880                     | ,803                       | ,967             |
|                                       | N                       | 45                         | 45                    | 45                   | 45                       | 45                         | 45               |
| X.Ruminococcus..gavreaii.group_change | Correlation Coefficient | ,178                       | ,044                  | -,159                | ,026                     | -,040                      | ,033             |
|                                       | Sig. (2-tailed)         | ,241                       | ,773                  | ,297                 | ,864                     | ,794                       | ,831             |
|                                       | N                       | 45                         | 45                    | 45                   | 45                       | 45                         | 45               |

## Correlations

|                                             |                         | Shuttleworthia_<br>change | Subdoligranulu<br>m_change | UCG.<br>003_change | X.Eubacterium..<br>brachy.<br>group_change | X.<br>Ruminococcus.<br>.gauvreauii.<br>group_change | X.<br>Ruminococcus.<br>.torques.<br>group_change |
|---------------------------------------------|-------------------------|---------------------------|----------------------------|--------------------|--------------------------------------------|-----------------------------------------------------|--------------------------------------------------|
| Ligilactobacillus_change                    | Correlation Coefficient | -,075                     | ,258                       | -,174              | -,023                                      | ,026                                                | ,101                                             |
|                                             | Sig. (2-tailed)         | ,623                      | ,088                       | ,253               | ,880                                       | ,864                                                | ,511                                             |
|                                             | N                       | 45                        | 45                         | 45                 | 45                                         | 45                                                  | 45                                               |
| Limosilactobacillus_change                  | Correlation Coefficient | ,067                      | -,188                      | -,070              | ,038                                       | -,040                                               | -,198                                            |
|                                             | Sig. (2-tailed)         | ,661                      | ,217                       | ,648               | ,803                                       | ,794                                                | ,192                                             |
|                                             | N                       | 45                        | 45                         | 45                 | 45                                         | 45                                                  | 45                                               |
| Roseburia_change                            | Correlation Coefficient | ,080                      | -,247                      | ,239               | -,006                                      | ,033                                                | -,192                                            |
|                                             | Sig. (2-tailed)         | ,603                      | ,102                       | ,114               | ,967                                       | ,831                                                | ,205                                             |
|                                             | N                       | 45                        | 45                         | 45                 | 45                                         | 45                                                  | 45                                               |
| Shuttleworthia_change                       | Correlation Coefficient | 1,000                     | -,188                      | -,004              | ,083                                       | -,090                                               | -,069                                            |
|                                             | Sig. (2-tailed)         | .                         | ,215                       | ,980               | ,589                                       | ,554                                                | ,652                                             |
|                                             | N                       | 45                        | 45                         | 45                 | 45                                         | 45                                                  | 45                                               |
| Subdoligranulum_change                      | Correlation Coefficient | -,188                     | 1,000                      | -,157              | -,039                                      | ,286                                                | ,201                                             |
|                                             | Sig. (2-tailed)         | ,215                      | .                          | ,302               | ,797                                       | ,057                                                | ,185                                             |
|                                             | N                       | 45                        | 45                         | 45                 | 45                                         | 45                                                  | 45                                               |
| UCG.003_change                              | Correlation Coefficient | -,004                     | -,157                      | 1,000              | -,044                                      | -,265                                               | -,349                                            |
|                                             | Sig. (2-tailed)         | ,980                      | ,302                       | .                  | ,774                                       | ,078                                                | ,019                                             |
|                                             | N                       | 45                        | 45                         | 45                 | 45                                         | 45                                                  | 45                                               |
| X.Eubacterium..brachy.<br>group_change      | Correlation Coefficient | ,083                      | -,039                      | -,044              | 1,000                                      | -,241                                               | ,086                                             |
|                                             | Sig. (2-tailed)         | ,589                      | ,797                       | ,774               | .                                          | ,111                                                | ,573                                             |
|                                             | N                       | 45                        | 45                         | 45                 | 45                                         | 45                                                  | 45                                               |
| X.Ruminococcus..<br>gauvreauii.group_change | Correlation Coefficient | -,090                     | ,286                       | -,265              | -,241                                      | 1,000                                               | -,016                                            |
|                                             | Sig. (2-tailed)         | ,554                      | ,057                       | ,078               | ,111                                       | .                                                   | ,915                                             |
|                                             | N                       | 45                        | 45                         | 45                 | 45                                         | 45                                                  | 45                                               |



### Correlations

|                                          | interaction_VTA<br>_change                 | interaction_rOF<br>C_change | interaction_rmO<br>FC_change | sumscore_GIQ<br>LI_change | Stool_frequenc<br>y_change | STGHRE_chan<br>ge |
|------------------------------------------|--------------------------------------------|-----------------------------|------------------------------|---------------------------|----------------------------|-------------------|
| X.Ruminococcus..torques.<br>group_change | Correlation Coefficient<br>Sig. (2-tailed) | -.229<br>,140               | -,194<br>,230                | ,305<br>,044              | ,271<br>,079               | ,230<br>,144      |
|                                          | N                                          | 43                          | 40                           | 44                        | 43                         | 42                |

### Correlations

|                                          | STPYY_change                               | STGLPT_chan<br>ge | age          | BMI          | FM_stand     | Richness     | shannon.<br>effective |
|------------------------------------------|--------------------------------------------|-------------------|--------------|--------------|--------------|--------------|-----------------------|
| X.Ruminococcus..torques.<br>group_change | Correlation Coefficient<br>Sig. (2-tailed) | ,183<br>,247      | ,092<br>,561 | ,053<br>,728 | ,019<br>,904 | ,079<br>,607 | ,122<br>,425          |
|                                          | N                                          | 42                | 45           | 45           | 45           | 45           | 45                    |

### Correlations

|                                          | simpson.<br>effective                      | Evenness     | CHOL_change  | LDL_change    | shannon.<br>effective_chang<br>e | Richness_chan<br>ge |
|------------------------------------------|--------------------------------------------|--------------|--------------|---------------|----------------------------------|---------------------|
| X.Ruminococcus..torques.<br>group_change | Correlation Coefficient<br>Sig. (2-tailed) | ,163<br>,284 | ,204<br>,179 | -,067<br>,663 | -,037<br>,812                    | ,083<br>,586        |
|                                          | N                                          | 45           | 45           | 45            | 45                               | 45                  |

### Correlations

|                                          | Evenness_change         | Actinomyces_change | Aerostipes_change | Bifidobacterium_change | Blautia_change | Collinsella_change |
|------------------------------------------|-------------------------|--------------------|-------------------|------------------------|----------------|--------------------|
| X.Ruminococcus..torques.<br>group_change | ,242                    | ,286               | ,134              | -,128                  | ,288           | ,158               |
|                                          | ,109                    | ,056               | ,380              | ,402                   | ,055           | ,300               |
|                                          | 45                      | 45                 | 45                | 45                     | 45             | 45                 |
|                                          | Correlation Coefficient |                    |                   |                        |                |                    |
|                                          | Sig. (2-tailed)         |                    |                   |                        |                |                    |
|                                          | N                       |                    |                   |                        |                |                    |

### Correlations

|                                          | Desulfovibrio_change    | Eggerthella_change | Erysipelatoclostridium_change | Faecalitalea_change | Family.XIII.AD3011_group_change | Family.XIII.UCG.001_group_change |
|------------------------------------------|-------------------------|--------------------|-------------------------------|---------------------|---------------------------------|----------------------------------|
| X.Ruminococcus..torques.<br>group_change | -,151                   | -,038              | ,060                          | ,190                | ,281                            | ,041                             |
|                                          | ,323                    | ,804               | ,698                          | ,211                | ,062                            | ,791                             |
|                                          | 45                      | 45                 | 45                            | 45                  | 45                              | 45                               |
|                                          | Correlation Coefficient |                    |                               |                     |                                 |                                  |
|                                          | Sig. (2-tailed)         |                    |                               |                     |                                 |                                  |
|                                          | N                       |                    |                               |                     |                                 |                                  |

### Correlations

|                                          | Gemella_change          | Gordonibacter_change | Holdemania_change | Holdemania_change | Lachnospiraceae.FCS020_group_change | Lachnospiraceae.NK4A136_group_change |
|------------------------------------------|-------------------------|----------------------|-------------------|-------------------|-------------------------------------|--------------------------------------|
| X.Ruminococcus..torques.<br>group_change | ,082                    | -,156                | ,204              | -,192             | ,105                                | -,207                                |
|                                          | ,594                    | ,305                 | ,179              | ,206              | ,493                                | ,173                                 |
|                                          | 45                      | 45                   | 45                | 45                | 45                                  | 45                                   |
|                                          | Correlation Coefficient |                      |                   |                   |                                     |                                      |
|                                          | Sig. (2-tailed)         |                      |                   |                   |                                     |                                      |
|                                          | N                       |                      |                   |                   |                                     |                                      |

### Correlations

|                                          | Lactiplantibacillus_change                 | Lactobacillus_c_hange | Libanicoccus_c_hange | Ligilactobacillus_change | Limosilactobacillus_change | Roseburia_change |
|------------------------------------------|--------------------------------------------|-----------------------|----------------------|--------------------------|----------------------------|------------------|
| X.Ruminococcus..torques.<br>group_change | Correlation Coefficient<br>Sig. (2-tailed) | -.047<br>,760         | -,111<br>,466        | -,241<br>,110            | ,101<br>,511               | -,198<br>,192    |
|                                          | N                                          | 45                    | 45                   | 45                       | 45                         | 45               |

### Correlations

|                                          | Shuttleworthia_change                      | Subdoligranulum_change | UCG.003_change | X.Eubacterium..brachy.<br>group_change | X.<br>Ruminococcus.<br>gavvreauii.<br>group_change | X.<br>Ruminococcus.<br>torques.<br>group_change |
|------------------------------------------|--------------------------------------------|------------------------|----------------|----------------------------------------|----------------------------------------------------|-------------------------------------------------|
| X.Ruminococcus..torques.<br>group_change | Correlation Coefficient<br>Sig. (2-tailed) | -,069<br>,652          | ,201<br>,185   | -,349<br>,019                          | -,016<br>,915                                      | 1,000<br>.                                      |
|                                          | N                                          | 45                     | 45             | 45                                     | 45                                                 | 45                                              |

## Correlations

| Spearman's rho          | interaction_VTA_change | interaction_rOF_C_change | interaction_rmOFC_change | sumscore_GIQ_LI_change | Stool_frequency_change | STGHRE_chan |
|-------------------------|------------------------|--------------------------|--------------------------|------------------------|------------------------|-------------|
| Correlation Coefficient | 1,000                  | ,344*                    | ,414**                   | -,162                  | -,159                  | ,043        |
| Sig. (2-tailed)         | .                      | ,028                     | ,005                     | ,299                   | ,316                   | ,793        |
| N                       | 44                     | 41                       | 44                       | 43                     | 42                     | 40          |
| Correlation Coefficient | ,344*                  | 1,000                    | ,410**                   | -,295                  | ,014                   | ,070        |
| Sig. (2-tailed)         | ,028                   | .                        | ,008                     | ,065                   | ,934                   | ,681        |
| N                       | 41                     | 41                       | 41                       | 40                     | 39                     | 37          |
| Correlation Coefficient | ,414**                 | ,410**                   | 1,000                    | ,010                   | ,027                   | ,253        |
| Sig. (2-tailed)         | ,005                   | ,008                     | .                        | ,947                   | ,867                   | ,116        |
| N                       | 44                     | 41                       | 44                       | 43                     | 42                     | 40          |
| Correlation Coefficient | -,162                  | -,295                    | ,010                     | 1,000                  | ,063                   | ,054        |
| Sig. (2-tailed)         | ,299                   | ,065                     | ,947                     | .                      | ,683                   | ,738        |
| N                       | 43                     | 40                       | 43                       | 45                     | 44                     | 41          |
| Correlation Coefficient | -,159                  | ,014                     | ,027                     | ,063                   | 1,000                  | -,082       |
| Sig. (2-tailed)         | ,316                   | ,934                     | ,867                     | ,683                   | .                      | ,615        |
| N                       | 42                     | 39                       | 42                       | 44                     | 44                     | 40          |
| Correlation Coefficient | ,043                   | ,070                     | ,253                     | ,054                   | -,082                  | 1,000       |
| Sig. (2-tailed)         | ,793                   | ,681                     | ,116                     | ,738                   | ,615                   | .           |
| N                       | 40                     | 37                       | 40                       | 41                     | 40                     | 42          |
| Correlation Coefficient | ,439**                 | ,348*                    | ,318*                    | -,159                  | -,047                  | ,011        |
| Sig. (2-tailed)         | ,005                   | ,035                     | ,046                     | ,321                   | ,774                   | ,947        |
| N                       | 40                     | 37                       | 40                       | 41                     | 40                     | 42          |
| Correlation Coefficient | ,057                   | ,192                     | -,012                    | ,117                   | ,011                   | -,193       |
| Sig. (2-tailed)         | ,727                   | ,254                     | ,943                     | ,468                   | ,946                   | ,221        |
| N                       | 40                     | 37                       | 40                       | 41                     | 40                     | 42          |

## Correlations

| Spearman's rho | interaction_VTA_change   | STPY change | STGLPT_chan<br>ge | age   | BMI   | FM_stand | Richness | shannon.<br>effective |
|----------------|--------------------------|-------------|-------------------|-------|-------|----------|----------|-----------------------|
|                | Correlation Coefficient  | ,439**      | ,057              | -,028 | -,251 | ,104     | ,182     | ,160                  |
|                | Sig. (2-tailed)          | ,005        | ,727              | ,854  | ,100  | ,500     | ,237     | ,299                  |
|                | N                        | 40          | 40                | 44    | 44    | 44       | 44       | 44                    |
|                | interaction_rOFC_change  | ,348*       | ,192              | ,385* | -,273 | -,088    | ,041     | ,020                  |
|                | Sig. (2-tailed)          | ,035        | ,254              | ,013  | ,084  | ,585     | ,797     | ,901                  |
|                | N                        | 37          | 37                | 41    | 41    | 41       | 41       | 41                    |
|                | interaction_rmOFC_change | ,318*       | -,012             | ,167  | -,174 | -,031    | -,116    | -,125                 |
|                | Sig. (2-tailed)          | ,046        | ,943              | ,279  | ,259  | ,839     | ,453     | ,418                  |
|                | N                        | 40          | 40                | 44    | 44    | 44       | 44       | 44                    |
|                | sumscore_GIQLI_change    | -,159       | ,117              | ,175  | ,155  | ,154     | ,181     | ,181                  |
|                | Sig. (2-tailed)          | ,321        | ,468              | ,251  | ,309  | ,312     | ,235     | ,234                  |
|                | N                        | 41          | 41                | 45    | 45    | 45       | 45       | 45                    |
|                | Stool_frequency_change   | -,047       | ,011              | -,127 | -,034 | -,242    | -,278    | -,259                 |
|                | Sig. (2-tailed)          | ,774        | ,946              | ,410  | ,829  | ,114     | ,067     | ,090                  |
|                | N                        | 40          | 40                | 44    | 44    | 44       | 44       | 44                    |
|                | STGHRE_change            | ,011        | -,193             | -,051 | -,174 | -,351*   | -,072    | -,072                 |
|                | Sig. (2-tailed)          | ,947        | ,221              | ,748  | ,270  | ,023     | ,652     | ,652                  |
|                | N                        | 42          | 42                | 42    | 42    | 42       | 42       | 42                    |
|                | STPY change              | 1,000       | ,113              | -,020 | -,078 | ,124     | ,137     | ,141                  |
|                | Sig. (2-tailed)          | .           | ,478              | ,902  | ,625  | ,433     | ,388     | ,374                  |
|                | N                        | 42          | 42                | 42    | 42    | 42       | 42       | 42                    |
|                | STGLPT_change            | ,113        | 1,000             | -,094 | ,131  | ,150     | ,127     | ,044                  |
|                | Sig. (2-tailed)          | ,478        | .                 | ,556  | ,408  | ,344     | ,423     | ,780                  |
|                | N                        | 42          | 42                | 42    | 42    | 42       | 42       | 42                    |

## Correlations

| Spearman's rho | interaction_VTA_change   | Correlation Coefficient | simpson.<br>effective | Evenness | CHOL_change | LDL_change | shannon.<br>effective | Richness_chan<br>ge |
|----------------|--------------------------|-------------------------|-----------------------|----------|-------------|------------|-----------------------|---------------------|
|                |                          | Correlation Coefficient | ,081                  | -,185    | -,066       | -,080      | ,241                  | ,154                |
|                |                          | Sig. (2-tailed)         | ,603                  | ,229     | ,669        | ,607       | ,120                  | ,323                |
|                |                          | N                       | 44                    | 44       | 44          | 44         | 43                    | 43                  |
|                | interaction_rOFC_change  | Correlation Coefficient | -,039                 | -,136    | ,041        | ,057       | -,253                 | -,211               |
|                |                          | Sig. (2-tailed)         | ,811                  | ,398     | ,800        | ,721       | ,115                  | ,191                |
|                |                          | N                       | 41                    | 41       | 41          | 41         | 40                    | 40                  |
|                | interaction_rmOFC_change | Correlation Coefficient | -,130                 | -,124    | -,086       | -,199      | -,154                 | -,177               |
|                |                          | Sig. (2-tailed)         | ,400                  | ,422     | ,578        | ,196       | ,324                  | ,256                |
|                |                          | N                       | 44                    | 44       | 44          | 44         | 43                    | 43                  |
|                | sumscore_GIQLI_change    | Correlation Coefficient | ,253                  | ,071     | -,157       | -,079      | ,154                  | ,122                |
|                |                          | Sig. (2-tailed)         | ,094                  | ,644     | ,304        | ,608       | ,319                  | ,431                |
|                |                          | N                       | 45                    | 45       | 45          | 45         | 44                    | 44                  |
|                | Stool_frequency_change   | Correlation Coefficient | -,216                 | ,040     | -,200       | -,075      | -,270                 | -,326*              |
|                |                          | Sig. (2-tailed)         | ,159                  | ,797     | ,194        | ,631       | ,080                  | ,033                |
|                |                          | N                       | 44                    | 44       | 44          | 44         | 43                    | 43                  |
|                | STGHRE_change            | Correlation Coefficient | -,017                 | -,022    | -,506**     | -,532**    | ,007                  | -,070               |
|                |                          | Sig. (2-tailed)         | ,914                  | ,889     | ,001        | ,000       | ,964                  | ,659                |
|                |                          | N                       | 42                    | 42       | 42          | 42         | 42                    | 42                  |
|                | STPYY_change             | Correlation Coefficient | ,090                  | -,060    | ,083        | ,080       | -,089                 | -,204               |
|                |                          | Sig. (2-tailed)         | ,570                  | ,706     | ,600        | ,615       | ,575                  | ,196                |
|                |                          | N                       | 42                    | 42       | 42          | 42         | 42                    | 42                  |
|                | STGLPT_change            | Correlation Coefficient | -,017                 | -,131    | ,230        | ,233       | ,014                  | -,014               |
|                |                          | Sig. (2-tailed)         | ,917                  | ,408     | ,143        | ,137       | ,928                  | ,931                |
|                |                          | N                       | 42                    | 42       | 42          | 42         | 42                    | 42                  |

## Correlations

|                |                          | Evenness_chan<br>ge     | Actinomyces_c<br>hange | Aerostipes_cha<br>nge | Bifidobacterium<br>_change | Blautia_change | Collinsella_cha<br>nge |       |
|----------------|--------------------------|-------------------------|------------------------|-----------------------|----------------------------|----------------|------------------------|-------|
| Spearman's rho | interaction_VTA_change   | Correlation Coefficient | ,112                   | -,042                 | -,264                      | -,152          | -,238                  | ,024  |
|                |                          | Sig. (2-tailed)         | ,473                   | ,791                  | ,088                       | ,332           | ,124                   | ,878  |
|                |                          | N                       | 43                     | 43                    | 43                         | 43             | 43                     | 43    |
|                | interaction_rOFC_change  | Correlation Coefficient | -,227                  | ,268                  | -,206                      | -,136          | ,179                   | ,178  |
|                |                          | Sig. (2-tailed)         | ,159                   | ,094                  | ,201                       | ,401           | ,270                   | ,271  |
|                |                          | N                       | 40                     | 40                    | 40                         | 40             | 40                     | 40    |
|                | interaction_rmOFC_change | Correlation Coefficient | -,045                  | ,173                  | ,039                       | ,098           | ,084                   | ,150  |
|                |                          | Sig. (2-tailed)         | ,772                   | ,268                  | ,806                       | ,533           | ,594                   | ,339  |
|                |                          | N                       | 43                     | 43                    | 43                         | 43             | 43                     | 43    |
|                | sumscore_GIQLI_change    | Correlation Coefficient | ,171                   | -,130                 | ,021                       | -,109          | ,166                   | -,202 |
|                |                          | Sig. (2-tailed)         | ,266                   | ,401                  | ,892                       | ,482           | ,283                   | ,189  |
|                |                          | N                       | 44                     | 44                    | 44                         | 44             | 44                     | 44    |
|                | Stool_frequency_change   | Correlation Coefficient | ,106                   | -,006                 | ,325*                      | -,125          | ,115                   | ,151  |
|                |                          | Sig. (2-tailed)         | ,498                   | ,972                  | ,034                       | ,425           | ,465                   | ,333  |
|                |                          | N                       | 43                     | 43                    | 43                         | 43             | 43                     | 43    |
|                | STGHRE_change            | Correlation Coefficient | ,124                   | ,008                  | -,040                      | -,225          | ,163                   | ,014  |
|                |                          | Sig. (2-tailed)         | ,433                   | ,958                  | ,803                       | ,151           | ,301                   | ,930  |
|                |                          | N                       | 42                     | 42                    | 42                         | 42             | 42                     | 42    |
|                | STPYY_change             | Correlation Coefficient | ,122                   | ,084                  | ,001                       | ,012           | -,021                  | ,176  |
|                |                          | Sig. (2-tailed)         | ,442                   | ,599                  | ,995                       | ,940           | ,894                   | ,266  |
|                |                          | N                       | 42                     | 42                    | 42                         | 42             | 42                     | 42    |
|                | STGLPT_change            | Correlation Coefficient | ,073                   | -,030                 | ,067                       | ,014           | ,209                   | ,004  |
|                |                          | Sig. (2-tailed)         | ,644                   | ,852                  | ,673                       | ,929           | ,184                   | ,978  |
|                |                          | N                       | 42                     | 42                    | 42                         | 42             | 42                     | 42    |

## Correlations

| Spearman's rho | interaction_VTA_change   | Desulfovibrio_c<br>hange | Eggerthella_ch<br>ange | Erysipelatoclost<br>ridium_change | Faecalitalea_ch<br>ange | Family.XIII.<br>AD3011.<br>group_change | Family.XIII.<br>UCG.<br>001_change |
|----------------|--------------------------|--------------------------|------------------------|-----------------------------------|-------------------------|-----------------------------------------|------------------------------------|
|                | Correlation Coefficient  | ,034                     | ,020                   | ,159                              | -,099                   | ,121                                    | -,080                              |
|                | Sig. (2-tailed)          | ,830                     | ,899                   | ,309                              | ,526                    | ,440                                    | ,611                               |
|                | N                        | 43                       | 43                     | 43                                | 43                      | 43                                      | 43                                 |
|                | interaction_rOFC_change  | -,009                    | ,022                   | -,021                             | -,018                   | ,191                                    | ,064                               |
|                | Sig. (2-tailed)          | ,955                     | ,892                   | ,900                              | ,911                    | ,238                                    | ,696                               |
|                | N                        | 40                       | 40                     | 40                                | 40                      | 40                                      | 40                                 |
|                | interaction_rmOFC_change | -,084                    | -,027                  | -,063                             | ,035                    | ,070                                    | -,206                              |
|                | Sig. (2-tailed)          | ,591                     | ,862                   | ,688                              | ,825                    | ,655                                    | ,185                               |
|                | N                        | 43                       | 43                     | 43                                | 43                      | 43                                      | 43                                 |
|                | sumscore_GIQLI_change    | ,059                     | ,104                   | ,190                              | ,038                    | ,180                                    | ,009                               |
|                | Sig. (2-tailed)          | ,704                     | ,503                   | ,216                              | ,809                    | ,241                                    | ,953                               |
|                | N                        | 44                       | 44                     | 44                                | 44                      | 44                                      | 44                                 |
|                | Stool_frequency_change   | ,066                     | -,131                  | -,291                             | -,040                   | ,250                                    | -,054                              |
|                | Sig. (2-tailed)          | ,674                     | ,403                   | ,058                              | ,798                    | ,105                                    | ,731                               |
|                | N                        | 43                       | 43                     | 43                                | 43                      | 43                                      | 43                                 |
|                | STGHRE_change            | -,095                    | -,126                  | -,075                             | ,166                    | ,125                                    | ,215                               |
|                | Sig. (2-tailed)          | ,551                     | ,425                   | ,639                              | ,294                    | ,430                                    | ,171                               |
|                | N                        | 42                       | 42                     | 42                                | 42                      | 42                                      | 42                                 |
|                | STPYY_change             | -,370*                   | ,032                   | -,017                             | ,011                    | ,171                                    | ,017                               |
|                | Sig. (2-tailed)          | ,016                     | ,839                   | ,913                              | ,945                    | ,279                                    | ,913                               |
|                | N                        | 42                       | 42                     | 42                                | 42                      | 42                                      | 42                                 |
|                | STGLPT_change            | -,069                    | ,103                   | ,296                              | ,090                    | ,058                                    | ,205                               |
|                | Sig. (2-tailed)          | ,666                     | ,518                   | ,057                              | ,570                    | ,717                                    | ,192                               |
|                | N                        | 42                       | 42                     | 42                                | 42                      | 42                                      | 42                                 |



## Correlations

|                          | Gemella_chang<br>e                              | Gordombacter_<br>change | Holdemania_<br>change | Holdemania_ch<br>ange | Lachnospiracea<br>e.FCS020.<br>group_change | Lachnospiracea<br>e.NK4A136.<br>group_change |
|--------------------------|-------------------------------------------------|-------------------------|-----------------------|-----------------------|---------------------------------------------|----------------------------------------------|
| Spearman's rho           |                                                 |                         |                       |                       |                                             |                                              |
| interaction_VTA_change   | Correlation Coefficient<br>Sig. (2-tailed)<br>N | -.174<br>,025<br>43     | -.083<br>,597<br>43   | -,116<br>,459<br>43   | -,041<br>,792<br>43                         | ,286<br>,063<br>43                           |
| interaction_rOFC_change  | Correlation Coefficient<br>Sig. (2-tailed)<br>N | ,295<br>,064<br>40      | ,049<br>,764<br>40    | -,259<br>,107<br>40   | -,079<br>,627<br>40                         | -,093<br>,566<br>40                          |
| interaction_rmOFC_change | Correlation Coefficient<br>Sig. (2-tailed)<br>N | ,196<br>,209<br>43      | ,005<br>,972<br>43    | -,195<br>,211<br>43   | ,028<br>,860<br>43                          | -,001<br>,996<br>43                          |
| sumscore_GIQLI_change    | Correlation Coefficient<br>Sig. (2-tailed)<br>N | ,086<br>,577<br>44      | ,160<br>,301<br>44    | ,095<br>,539<br>44    | ,133<br>,390<br>44                          | ,000<br>,998<br>44                           |
| Stool_frequency_change   | Correlation Coefficient<br>Sig. (2-tailed)<br>N | -,119<br>,445<br>43     | -,104<br>,505<br>43   | -,016<br>,919<br>43   | -,071<br>,649<br>43                         | -,013<br>,933<br>43                          |
| STGHRE_change            | Correlation Coefficient<br>Sig. (2-tailed)<br>N | -,105<br>,510<br>42     | -,104<br>,514<br>42   | ,015<br>,927<br>42    | -,078<br>,624<br>42                         | ,094<br>,554<br>42                           |
| STPYY_change             | Correlation Coefficient<br>Sig. (2-tailed)<br>N | -,139<br>,381<br>42     | -,043<br>,785<br>42   | -,157<br>,321<br>42   | ,076<br>,633<br>42                          | ,155<br>,326<br>42                           |
| STGLPT_change            | Correlation Coefficient<br>Sig. (2-tailed)<br>N | ,150<br>,342<br>42      | ,166<br>,294<br>42    | -,266<br>,089<br>42   | ,162<br>,307<br>42                          | -,079<br>,621<br>42                          |

## Correlations

| Spearman's rho | interaction_VTA_change   | Correlation Coefficient | Lactiplantibacillus_change | Lactobacillus_change | Libanicoccus_change | Ligilactobacillus_change | Limosilactobacillus_change | Roseburia_change |
|----------------|--------------------------|-------------------------|----------------------------|----------------------|---------------------|--------------------------|----------------------------|------------------|
|                |                          |                         | -,006                      | -,023                | ,294                | -,175                    | -,010                      | ,137             |
|                |                          | Correlation Coefficient | ,972                       | ,882                 | ,056                | ,262                     | ,949                       | ,380             |
|                |                          | Sig. (2-tailed)         | 43                         | 43                   | 43                  | 43                       | 43                         | 43               |
|                | interaction_rOFC_change  | Correlation Coefficient | ,120                       | ,046                 | ,211                | -,105                    | -,005                      | ,146             |
|                |                          | Sig. (2-tailed)         | ,459                       | ,778                 | ,192                | ,521                     | ,976                       | ,369             |
|                |                          | N                       | 40                         | 40                   | 40                  | 40                       | 40                         | 40               |
|                | interaction_rmOFC_change | Correlation Coefficient | ,397**                     | -,054                | ,223                | -,082                    | -,070                      | -,011            |
|                |                          | Sig. (2-tailed)         | ,008                       | ,731                 | ,151                | ,603                     | ,654                       | ,944             |
|                |                          | N                       | 43                         | 43                   | 43                  | 43                       | 43                         | 43               |
|                | sumscore_GIQLI_change    | Correlation Coefficient | ,168                       | -,033                | -,057               | ,054                     | ,058                       | ,025             |
|                |                          | Sig. (2-tailed)         | ,276                       | ,833                 | ,712                | ,727                     | ,706                       | ,870             |
|                |                          | N                       | 44                         | 44                   | 44                  | 44                       | 44                         | 44               |
|                | Stool_frequency_change   | Correlation Coefficient | -,007                      | ,105                 | -,187               | ,060                     | ,169                       | -,316*           |
|                |                          | Sig. (2-tailed)         | ,966                       | ,504                 | ,230                | ,703                     | ,278                       | ,039             |
|                |                          | N                       | 43                         | 43                   | 43                  | 43                       | 43                         | 43               |
|                | STGHRE_change            | Correlation Coefficient | ,131                       | -,070                | -,107               | -,017                    | -,196                      | -,209            |
|                |                          | Sig. (2-tailed)         | ,407                       | ,659                 | ,499                | ,914                     | ,212                       | ,184             |
|                |                          | N                       | 42                         | 42                   | 42                  | 42                       | 42                         | 42               |
|                | STPYY_change             | Correlation Coefficient | -,079                      | ,046                 | ,039                | ,015                     | ,027                       | -,048            |
|                |                          | Sig. (2-tailed)         | ,618                       | ,771                 | ,807                | ,924                     | ,864                       | ,763             |
|                |                          | N                       | 42                         | 42                   | 42                  | 42                       | 42                         | 42               |
|                | STGLPT_change            | Correlation Coefficient | -,186                      | -,181                | ,115                | ,038                     | -,182                      | -,035            |
|                |                          | Sig. (2-tailed)         | ,238                       | ,251                 | ,468                | ,813                     | ,248                       | ,824             |
|                |                          | N                       | 42                         | 42                   | 42                  | 42                       | 42                         | 42               |

## Correlations

| Spearman's rho | interaction_VTA_change   | Shuttleworthia_change | Subdoligranulum_change | UCG_003_change | Xi.Eubacterium..brachy_group_change | X.Ruminococcus.gauvreauii_group_change | X.Ruminococcus.torques_group_change |
|----------------|--------------------------|-----------------------|------------------------|----------------|-------------------------------------|----------------------------------------|-------------------------------------|
|                | Correlation Coefficient  | ,191                  | -,384*                 | ,185           | ,115                                | -,194                                  | -,229                               |
|                | Sig. (2-tailed)          | ,220                  | ,011                   | ,236           | ,464                                | ,211                                   | ,140                                |
|                | N                        | 43                    | 43                     | 43             | 43                                  | 43                                     | 43                                  |
|                | interaction_rOFC_change  | -,155                 | -,159                  | ,122           | -,177                               | -,143                                  | -,194                               |
|                | Sig. (2-tailed)          | ,338                  | ,329                   | ,453           | ,275                                | ,377                                   | ,230                                |
|                | N                        | 40                    | 40                     | 40             | 40                                  | 40                                     | 40                                  |
|                | interaction_rmOFC_change | ,032                  | -,015                  | -,094          | ,038                                | -,024                                  | -,133                               |
|                | Sig. (2-tailed)          | ,838                  | ,922                   | ,551           | ,809                                | ,879                                   | ,397                                |
|                | N                        | 43                    | 43                     | 43             | 43                                  | 43                                     | 43                                  |
|                | sumscore_GIQLI_change    | ,210                  | ,261                   | -,255          | ,090                                | ,113                                   | ,305*                               |
|                | Sig. (2-tailed)          | ,172                  | ,087                   | ,095           | ,561                                | ,465                                   | ,044                                |
|                | N                        | 44                    | 44                     | 44             | 44                                  | 44                                     | 44                                  |
|                | Stool_frequency_change   | ,115                  | ,083                   | -,067          | -,196                               | -,091                                  | ,271                                |
|                | Sig. (2-tailed)          | ,462                  | ,598                   | ,669           | ,209                                | ,560                                   | ,079                                |
|                | N                        | 43                    | 43                     | 43             | 43                                  | 43                                     | 43                                  |
|                | STGHRE_change            | -,164                 | ,279                   | -,059          | -,097                               | -,100                                  | ,230                                |
|                | Sig. (2-tailed)          | ,300                  | ,073                   | ,711           | ,540                                | ,528                                   | ,144                                |
|                | N                        | 42                    | 42                     | 42             | 42                                  | 42                                     | 42                                  |
|                | STPYY_change             | -,068                 | -,210                  | -,176          | -,061                               | -,063                                  | ,183                                |
|                | Sig. (2-tailed)          | ,669                  | ,182                   | ,264           | ,702                                | ,693                                   | ,247                                |
|                | N                        | 42                    | 42                     | 42             | 42                                  | 42                                     | 42                                  |
|                | STGLPT_change            | -,074                 | ,009                   | -,165          | ,179                                | -,159                                  | ,092                                |
|                | Sig. (2-tailed)          | ,644                  | ,957                   | ,296           | ,256                                | ,314                                   | ,561                                |
|                | N                        | 42                    | 42                     | 42             | 42                                  | 42                                     | 42                                  |

## Correlations

|                   | interaction_VTA<br>_change                      | interaction_rOF<br>C_change | interaction_rmO<br>FC_change | sumscore_GIQ<br>LI_change | Stool_frequenc<br>y_change | STGHRE_chan<br>ge   |
|-------------------|-------------------------------------------------|-----------------------------|------------------------------|---------------------------|----------------------------|---------------------|
| age               | Correlation Coefficient<br>Sig. (2-tailed)<br>N | -,028<br>,854<br>44         | ,385*<br>,013<br>41          | ,167<br>,279<br>44        | ,175<br>,251<br>45         | -,127<br>,410<br>44 |
| BMI               | Correlation Coefficient<br>Sig. (2-tailed)<br>N | -,251<br>,100<br>44         | -,273<br>,084<br>41          | -,174<br>,259<br>44       | ,155<br>,309<br>45         | -,034<br>,829<br>44 |
| FM_stand          | Correlation Coefficient<br>Sig. (2-tailed)<br>N | ,104<br>,500<br>44          | -,088<br>,585<br>41          | -,031<br>,839<br>44       | ,154<br>,312<br>45         | -,242<br>,114<br>44 |
| Richness          | Correlation Coefficient<br>Sig. (2-tailed)<br>N | ,182<br>,237<br>44          | ,041<br>,797<br>41           | -,116<br>,453<br>44       | ,181<br>,235<br>45         | -,278<br>,067<br>44 |
| shannon.effective | Correlation Coefficient<br>Sig. (2-tailed)<br>N | ,160<br>,299<br>44          | ,020<br>,901<br>41           | -,125<br>,418<br>44       | ,181<br>,234<br>45         | -,259<br>,090<br>44 |
| simpson.effective | Correlation Coefficient<br>Sig. (2-tailed)<br>N | ,081<br>,603<br>44          | -,039<br>,811<br>41          | -,130<br>,400<br>44       | ,253<br>,094<br>45         | -,216<br>,159<br>44 |
| Evenness          | Correlation Coefficient<br>Sig. (2-tailed)<br>N | -,185<br>,229<br>44         | -,136<br>,398<br>41          | -,124<br>,422<br>44       | ,071<br>,644<br>45         | ,040<br>,797<br>44  |
| CHOL_change       | Correlation Coefficient<br>Sig. (2-tailed)<br>N | -,066<br>,669<br>44         | ,041<br>,800<br>41           | -,086<br>,578<br>44       | -,157<br>,304<br>45        | -,200<br>,194<br>44 |

## Correlations

|                   | STPY change                                     | STGLPT change       | age                 | BMI                  | FM stand             | Richness             | shannon.<br>effective |
|-------------------|-------------------------------------------------|---------------------|---------------------|----------------------|----------------------|----------------------|-----------------------|
| age               | Correlation Coefficient<br>Sig. (2-tailed)<br>N | -.094<br>,556<br>42 | 1,000<br>.<br>46    | -.041<br>,789<br>46  | -.055<br>,718<br>46  | ,126<br>,402<br>46   | ,065<br>,670<br>46    |
| BMI               | Correlation Coefficient<br>Sig. (2-tailed)<br>N | -,078<br>,625<br>42 | -,041<br>,789<br>46 | 1,000<br>.<br>46     | ,463**<br>,001<br>46 | ,163<br>,278<br>46   | ,111<br>,463<br>46    |
| FM_stand          | Correlation Coefficient<br>Sig. (2-tailed)<br>N | ,124<br>,433<br>42  | -,055<br>,718<br>46 | ,463**<br>,001<br>46 | 1,000<br>.<br>46     | ,030<br>,842<br>46   | -,027<br>,856<br>46   |
| Richness          | Correlation Coefficient<br>Sig. (2-tailed)<br>N | ,137<br>,388<br>42  | ,126<br>,402<br>46  | ,163<br>,278<br>46   | ,030<br>,842<br>46   | 1,000<br>.<br>46     | ,949**<br>,000<br>46  |
| shannon.effective | Correlation Coefficient<br>Sig. (2-tailed)<br>N | ,141<br>,374<br>42  | ,065<br>,670<br>46  | ,111<br>,463<br>46   | -,027<br>,856<br>46  | ,949**<br>,000<br>46 | 1,000<br>.<br>46      |
| simpson.effective | Correlation Coefficient<br>Sig. (2-tailed)<br>N | ,090<br>,570<br>42  | ,058<br>,702<br>46  | ,068<br>,654<br>46   | -,071<br>,639<br>46  | ,886**<br>,000<br>46 | ,965**<br>,000<br>46  |
| Evenness          | Correlation Coefficient<br>Sig. (2-tailed)<br>N | -,060<br>,706<br>42 | -,096<br>,524<br>46 | -,029<br>,850<br>46  | -,094<br>,536<br>46  | ,153<br>,310<br>46   | ,405**<br>,005<br>46  |
| CHOL_change       | Correlation Coefficient<br>Sig. (2-tailed)<br>N | ,083<br>,600<br>42  | ,077<br>,611<br>46  | ,238<br>,111<br>46   | ,513**<br>,000<br>46 | ,010<br>,948<br>46   | -,067<br>,658<br>46   |

## Correlations

|                   |                         | simpson.<br>effective | Evenness | CHOL_change | LDL_change | shannon.<br>effective | Richness_chan<br>ge |
|-------------------|-------------------------|-----------------------|----------|-------------|------------|-----------------------|---------------------|
| age               | Correlation Coefficient | ,058                  | -,096    | ,077        | ,052       | -,019                 | ,089                |
|                   | Sig. (2-tailed)         | ,702                  | ,524     | ,611        | ,733       | ,903                  | ,559                |
|                   | N                       | 46                    | 46       | 46          | 46         | 45                    | 45                  |
| BMI               | Correlation Coefficient | ,068                  | -,029    | ,238        | ,202       | -,130                 | -,105               |
|                   | Sig. (2-tailed)         | ,654                  | ,850     | ,111        | ,179       | ,395                  | ,492                |
|                   | N                       | 46                    | 46       | 46          | 46         | 45                    | 45                  |
| FM_stand          | Correlation Coefficient | -,071                 | -,094    | ,513**      | ,478**     | ,014                  | ,167                |
|                   | Sig. (2-tailed)         | ,639                  | ,536     | ,000        | ,001       | ,927                  | ,274                |
|                   | N                       | 46                    | 46       | 46          | 46         | 45                    | 45                  |
| Richness          | Correlation Coefficient | ,886**                | ,153     | ,010        | -,042      | ,490**                | ,500**              |
|                   | Sig. (2-tailed)         | ,000                  | ,310     | ,948        | ,781       | ,001                  | ,000                |
|                   | N                       | 46                    | 46       | 46          | 46         | 45                    | 45                  |
| shannon.effective | Correlation Coefficient | ,965**                | ,405**   | -,067       | -,119      | ,570**                | ,512**              |
|                   | Sig. (2-tailed)         | ,000                  | ,005     | ,658        | ,430       | ,000                  | ,000                |
|                   | N                       | 46                    | 46       | 46          | 46         | 45                    | 45                  |
| simpson.effective | Correlation Coefficient | 1,000                 | ,491**   | -,114       | -,149      | ,586**                | ,500**              |
|                   | Sig. (2-tailed)         | .                     | ,001     | ,449        | ,322       | ,000                  | ,000                |
|                   | N                       | 46                    | 46       | 46          | 46         | 45                    | 45                  |
| Evenness          | Correlation Coefficient | ,491**                | 1,000    | -,053       | -,082      | ,347*                 | ,163                |
|                   | Sig. (2-tailed)         | ,001                  | .        | ,726        | ,588       | ,020                  | ,285                |
|                   | N                       | 46                    | 46       | 46          | 46         | 45                    | 45                  |
| CHOL_change       | Correlation Coefficient | -,114                 | -,053    | 1,000       | ,926**     | -,144                 | ,038                |
|                   | Sig. (2-tailed)         | ,449                  | ,726     | .           | ,000       | ,344                  | ,806                |
|                   | N                       | 46                    | 46       | 46          | 46         | 45                    | 45                  |

## Correlations

|                   |                         | Evenness_chan<br>ge | Actinomyces_c<br>hange | Aerostipes_cha<br>nge | Bifidobacterium<br>_change | Blautia_change | Collinsella_cha<br>nge |
|-------------------|-------------------------|---------------------|------------------------|-----------------------|----------------------------|----------------|------------------------|
| age               | Correlation Coefficient | -,205               | -,004                  | -,078                 | -,044                      | ,083           | -,228                  |
|                   | Sig. (2-tailed)         | ,177                | ,979                   | ,611                  | ,774                       | ,588           | ,133                   |
|                   | N                       | 45                  | 45                     | 45                    | 45                         | 45             | 45                     |
| BMI               | Correlation Coefficient | -,086               | -,121                  | ,105                  | ,013                       | -,132          | -,035                  |
|                   | Sig. (2-tailed)         | ,575                | ,429                   | ,491                  | ,933                       | ,387           | ,820                   |
|                   | N                       | 45                  | 45                     | 45                    | 45                         | 45             | 45                     |
| FM_stand          | Correlation Coefficient | -,303*              | ,085                   | -,157                 | ,323*                      | -,159          | ,013                   |
|                   | Sig. (2-tailed)         | ,043                | ,577                   | ,305                  | ,031                       | ,296           | ,932                   |
|                   | N                       | 45                  | 45                     | 45                    | 45                         | 45             | 45                     |
| Richness          | Correlation Coefficient | ,137                | -,028                  | ,011                  | -,514**                    | -,145          | -,354*                 |
|                   | Sig. (2-tailed)         | ,370                | ,856                   | ,943                  | ,000                       | ,341           | ,017                   |
|                   | N                       | 45                  | 45                     | 45                    | 45                         | 45             | 45                     |
| shannon.effective | Correlation Coefficient | ,306*               | -,017                  | ,036                  | -,582**                    | -,055          | -,322*                 |
|                   | Sig. (2-tailed)         | ,041                | ,912                   | ,816                  | ,000                       | ,722           | ,031                   |
|                   | N                       | 45                  | 45                     | 45                    | 45                         | 45             | 45                     |
| simpson.effective | Correlation Coefficient | ,373*               | -,085                  | ,058                  | -,626**                    | -,032          | -,369*                 |
|                   | Sig. (2-tailed)         | ,012                | ,577                   | ,703                  | ,000                       | ,833           | ,012                   |
|                   | N                       | 45                  | 45                     | 45                    | 45                         | 45             | 45                     |
| Evenness          | Correlation Coefficient | ,600**              | ,010                   | ,155                  | -,401**                    | ,355*          | -,060                  |
|                   | Sig. (2-tailed)         | ,000                | ,949                   | ,309                  | ,006                       | ,017           | ,697                   |
|                   | N                       | 45                  | 45                     | 45                    | 45                         | 45             | 45                     |
| CHOL_change       | Correlation Coefficient | -,308*              | ,118                   | -,260                 | ,153                       | -,016          | ,110                   |
|                   | Sig. (2-tailed)         | ,039                | ,441                   | ,084                  | ,316                       | ,914           | ,474                   |
|                   | N                       | 45                  | 45                     | 45                    | 45                         | 45             | 45                     |

## Correlations

|                   |                         | Desulfovibrio_c<br>hange | Eggerthella_ch<br>ange | Erysipelatoclost<br>ridium_change | Faecalitalea_ch<br>ange | Family.XIII.<br>AD3011.<br>group_change | Family.XIII.<br>UCG.<br>001_change |
|-------------------|-------------------------|--------------------------|------------------------|-----------------------------------|-------------------------|-----------------------------------------|------------------------------------|
| age               | Correlation Coefficient | ,135                     | ,151                   | ,005                              | -,041                   | -,057                                   | ,067                               |
|                   | Sig. (2-tailed)         | ,378                     | ,322                   | ,973                              | ,788                    | ,711                                    | ,663                               |
|                   | N                       | 45                       | 45                     | 45                                | 45                      | 45                                      | 45                                 |
| BMI               | Correlation Coefficient | -,268                    | ,107                   | ,250                              | ,041                    | ,033                                    | -,199                              |
|                   | Sig. (2-tailed)         | ,075                     | ,485                   | ,097                              | ,791                    | ,831                                    | ,190                               |
|                   | N                       | 45                       | 45                     | 45                                | 45                      | 45                                      | 45                                 |
| FM_stand          | Correlation Coefficient | -,284                    | ,228                   | ,207                              | ,055                    | -,024                                   | -,306*                             |
|                   | Sig. (2-tailed)         | ,059                     | ,131                   | ,172                              | ,721                    | ,876                                    | ,041                               |
|                   | N                       | 45                       | 45                     | 45                                | 45                      | 45                                      | 45                                 |
| Richness          | Correlation Coefficient | -,048                    | ,118                   | ,120                              | ,011                    | ,350*                                   | ,256                               |
|                   | Sig. (2-tailed)         | ,753                     | ,438                   | ,433                              | ,942                    | ,018                                    | ,090                               |
|                   | N                       | 45                       | 45                     | 45                                | 45                      | 45                                      | 45                                 |
| shannon.effective | Correlation Coefficient | -,048                    | ,104                   | ,112                              | ,026                    | ,325*                                   | ,236                               |
|                   | Sig. (2-tailed)         | ,755                     | ,498                   | ,464                              | ,864                    | ,029                                    | ,119                               |
|                   | N                       | 45                       | 45                     | 45                                | 45                      | 45                                      | 45                                 |
| simpson.effective | Correlation Coefficient | -,059                    | ,084                   | ,126                              | ,041                    | ,293                                    | ,240                               |
|                   | Sig. (2-tailed)         | ,699                     | ,583                   | ,408                              | ,788                    | ,051                                    | ,113                               |
|                   | N                       | 45                       | 45                     | 45                                | 45                      | 45                                      | 45                                 |
| Evenness          | Correlation Coefficient | -,091                    | ,081                   | -,016                             | ,117                    | ,022                                    | -,001                              |
|                   | Sig. (2-tailed)         | ,553                     | ,595                   | ,919                              | ,443                    | ,885                                    | ,996                               |
|                   | N                       | 45                       | 45                     | 45                                | 45                      | 45                                      | 45                                 |
| CHOL_change       | Correlation Coefficient | -,270                    | ,203                   | ,152                              | -,149                   | -,174                                   | -,319*                             |
|                   | Sig. (2-tailed)         | ,073                     | ,181                   | ,318                              | ,328                    | ,253                                    | ,033                               |
|                   | N                       | 45                       | 45                     | 45                                | 45                      | 45                                      | 45                                 |



## Correlations

|                   |                         | Gemella_chang<br>e | Gordoniibacter_<br>change | Holdemania_<br>change | Holdemania_<br>change | Holdemania_<br>change | Lachnospiraceae.FCS020.<br>group_change | Lachnospiraceae.NK4A136.<br>group_change |
|-------------------|-------------------------|--------------------|---------------------------|-----------------------|-----------------------|-----------------------|-----------------------------------------|------------------------------------------|
| age               | Correlation Coefficient | ,200               | ,239                      | -,098                 | ,177                  | -,187                 | ,152                                    | ,152                                     |
|                   | Sig. (2-tailed)         | ,187               | ,114                      | ,523                  | ,245                  | ,220                  | ,319                                    | ,319                                     |
|                   | N                       | 45                 | 45                        | 45                    | 45                    | 45                    | 45                                      | 45                                       |
| BMI               | Correlation Coefficient | -,204              | ,173                      | ,079                  | ,284                  | ,056                  | ,109                                    | ,109                                     |
|                   | Sig. (2-tailed)         | ,180               | ,257                      | ,606                  | ,058                  | ,713                  | ,476                                    | ,476                                     |
|                   | N                       | 45                 | 45                        | 45                    | 45                    | 45                    | 45                                      | 45                                       |
| FM_stand          | Correlation Coefficient | -,199              | ,090                      | ,056                  | ,017                  | -,044                 | ,114                                    | ,114                                     |
|                   | Sig. (2-tailed)         | ,189               | ,558                      | ,713                  | ,911                  | ,774                  | ,454                                    | ,454                                     |
|                   | N                       | 45                 | 45                        | 45                    | 45                    | 45                    | 45                                      | 45                                       |
| Richness          | Correlation Coefficient | -,070              | ,244                      | ,303*                 | ,395**                | ,238                  | ,177                                    | ,177                                     |
|                   | Sig. (2-tailed)         | ,648               | ,107                      | ,043                  | ,007                  | ,115                  | ,246                                    | ,246                                     |
|                   | N                       | 45                 | 45                        | 45                    | 45                    | 45                    | 45                                      | 45                                       |
| shannon.effective | Correlation Coefficient | -,050              | ,257                      | ,318*                 | ,414**                | ,193                  | ,117                                    | ,117                                     |
|                   | Sig. (2-tailed)         | ,745               | ,089                      | ,033                  | ,005                  | ,204                  | ,443                                    | ,443                                     |
|                   | N                       | 45                 | 45                        | 45                    | 45                    | 45                    | 45                                      | 45                                       |
| simpson.effective | Correlation Coefficient | -,066              | ,266                      | ,357*                 | ,438**                | ,205                  | ,108                                    | ,108                                     |
|                   | Sig. (2-tailed)         | ,667               | ,077                      | ,016                  | ,003                  | ,178                  | ,480                                    | ,480                                     |
|                   | N                       | 45                 | 45                        | 45                    | 45                    | 45                    | 45                                      | 45                                       |
| Evenness          | Correlation Coefficient | -,034              | ,248                      | ,092                  | ,206                  | -,019                 | -,153                                   | -,153                                    |
|                   | Sig. (2-tailed)         | ,824               | ,101                      | ,546                  | ,175                  | ,903                  | ,316                                    | ,316                                     |
|                   | N                       | 45                 | 45                        | 45                    | 45                    | 45                    | 45                                      | 45                                       |
| CHOL_change       | Correlation Coefficient | ,155               | ,192                      | ,137                  | -,201                 | ,182                  | ,013                                    | ,013                                     |
|                   | Sig. (2-tailed)         | ,311               | ,205                      | ,369                  | ,186                  | ,232                  | ,933                                    | ,933                                     |
|                   | N                       | 45                 | 45                        | 45                    | 45                    | 45                    | 45                                      | 45                                       |

## Correlations

|                   |                         | Lactiplantibacillus_change | Lactobacillus_change | Libanicoccus_change | Ligilactobacillus_change | Limosilactobacillus_change | Roseburia_change |
|-------------------|-------------------------|----------------------------|----------------------|---------------------|--------------------------|----------------------------|------------------|
| age               | Correlation Coefficient | -,003                      | ,190                 | ,250                | -,220                    | ,280                       | ,323*            |
|                   | Sig. (2-tailed)         | ,986                       | ,212                 | ,098                | ,146                     | ,062                       | ,030             |
|                   | N                       | 45                         | 45                   | 45                  | 45                       | 45                         | 45               |
| BMI               | Correlation Coefficient | -,024                      | -,043                | ,042                | ,072                     | -,257                      | -,120            |
|                   | Sig. (2-tailed)         | ,874                       | ,777                 | ,786                | ,637                     | ,088                       | ,434             |
|                   | N                       | 45                         | 45                   | 45                  | 45                       | 45                         | 45               |
| FM_stand          | Correlation Coefficient | ,182                       | ,118                 | -,048               | -,144                    | -,212                      | ,182             |
|                   | Sig. (2-tailed)         | ,231                       | ,440                 | ,753                | ,345                     | ,162                       | ,232             |
|                   | N                       | 45                         | 45                   | 45                  | 45                       | 45                         | 45               |
| Richness          | Correlation Coefficient | -,214                      | -,278                | ,110                | -,045                    | -,141                      | ,123             |
|                   | Sig. (2-tailed)         | ,159                       | ,065                 | ,470                | ,768                     | ,354                       | ,419             |
|                   | N                       | 45                         | 45                   | 45                  | 45                       | 45                         | 45               |
| shannon.effective | Correlation Coefficient | -,256                      | -,322*               | ,108                | ,004                     | -,098                      | ,096             |
|                   | Sig. (2-tailed)         | ,090                       | ,031                 | ,481                | ,979                     | ,523                       | ,532             |
|                   | N                       | 45                         | 45                   | 45                  | 45                       | 45                         | 45               |
| simpson.effective | Correlation Coefficient | -,284                      | -,340*               | ,007                | ,017                     | -,108                      | ,054             |
|                   | Sig. (2-tailed)         | ,059                       | ,022                 | ,963                | ,914                     | ,480                       | ,726             |
|                   | N                       | 45                         | 45                   | 45                  | 45                       | 45                         | 45               |
| Evenness          | Correlation Coefficient | -,172                      | -,226                | -,031               | ,145                     | ,031                       | -,126            |
|                   | Sig. (2-tailed)         | ,258                       | ,135                 | ,837                | ,342                     | ,839                       | ,409             |
|                   | N                       | 45                         | 45                   | 45                  | 45                       | 45                         | 45               |
| CHOL_change       | Correlation Coefficient | -,052                      | ,184                 | -,032               | -,061                    | -,076                      | ,028             |
|                   | Sig. (2-tailed)         | ,735                       | ,225                 | ,834                | ,689                     | ,622                       | ,857             |
|                   | N                       | 45                         | 45                   | 45                  | 45                       | 45                         | 45               |

## Correlations

|                   |                         | Shuttleworthia_<br>change | Subdoligranulu<br>m_change | UCG.<br>003_change | Xi.Eubacterium..<br>brachy.<br>group_change | X.<br>Ruminococcus.<br>.gavvreauii.<br>group_change | X.<br>Ruminococcus.<br>.torques.<br>group_change |
|-------------------|-------------------------|---------------------------|----------------------------|--------------------|---------------------------------------------|-----------------------------------------------------|--------------------------------------------------|
| age               | Correlation Coefficient | -,034                     | -,033                      | ,072               | -,090                                       | ,071                                                | -,302*                                           |
|                   | Sig. (2-tailed)         | ,825                      | ,827                       | ,638               | ,554                                        | ,642                                                | ,044                                             |
|                   | N                       | 45                        | 45                         | 45                 | 45                                          | 45                                                  | 45                                               |
| BMI               | Correlation Coefficient | ,016                      | ,175                       | ,239               | -,048                                       | -,050                                               | ,053                                             |
|                   | Sig. (2-tailed)         | ,915                      | ,252                       | ,113               | ,753                                        | ,744                                                | ,728                                             |
|                   | N                       | 45                        | 45                         | 45                 | 45                                          | 45                                                  | 45                                               |
| FM_stand          | Correlation Coefficient | ,312*                     | -,188                      | ,208               | ,150                                        | ,196                                                | ,019                                             |
|                   | Sig. (2-tailed)         | ,037                      | ,216                       | ,170               | ,324                                        | ,196                                                | ,904                                             |
|                   | N                       | 45                        | 45                         | 45                 | 45                                          | 45                                                  | 45                                               |
| Richness          | Correlation Coefficient | -,034                     | -,033                      | ,052               | ,244                                        | -,346*                                              | ,079                                             |
|                   | Sig. (2-tailed)         | ,826                      | ,831                       | ,736               | ,106                                        | ,020                                                | ,607                                             |
|                   | N                       | 45                        | 45                         | 45                 | 45                                          | 45                                                  | 45                                               |
| shannon.effective | Correlation Coefficient | -,090                     | ,008                       | ,083               | ,227                                        | -,288                                               | ,122                                             |
|                   | Sig. (2-tailed)         | ,556                      | ,956                       | ,587               | ,133                                        | ,055                                                | ,425                                             |
|                   | N                       | 45                        | 45                         | 45                 | 45                                          | 45                                                  | 45                                               |
| simpson.effective | Correlation Coefficient | -,080                     | ,101                       | ,035               | ,229                                        | -,249                                               | ,163                                             |
|                   | Sig. (2-tailed)         | ,603                      | ,511                       | ,818               | ,130                                        | ,099                                                | ,284                                             |
|                   | N                       | 45                        | 45                         | 45                 | 45                                          | 45                                                  | 45                                               |
| Evenness          | Correlation Coefficient | -,186                     | ,322*                      | ,030               | ,073                                        | ,176                                                | ,204                                             |
|                   | Sig. (2-tailed)         | ,222                      | ,031                       | ,844               | ,632                                        | ,247                                                | ,179                                             |
|                   | N                       | 45                        | 45                         | 45                 | 45                                          | 45                                                  | 45                                               |
| CHOL_change       | Correlation Coefficient | ,155                      | -,110                      | ,006               | ,000                                        | ,241                                                | -,067                                            |
|                   | Sig. (2-tailed)         | ,308                      | ,473                       | ,971               | 1,000                                       | ,110                                                | ,663                                             |
|                   | N                       | 45                        | 45                         | 45                 | 45                                          | 45                                                  | 45                                               |

## Correlations

|                          | interaction_VTA<br>_change                      | interaction_rOF<br>C_change | interaction_rmO<br>FC_change | sumscore_GIQ<br>LI_change | Stool_frequenc<br>y_change | STGHRE_chan<br>ge     |
|--------------------------|-------------------------------------------------|-----------------------------|------------------------------|---------------------------|----------------------------|-----------------------|
| LDL_change               | Correlation Coefficient<br>Sig. (2-tailed)<br>N | ,057<br>,721<br>41          | -,199<br>,196<br>44          | -,079<br>,608<br>45       | -,075<br>,631<br>44        | -,532**<br>,000<br>42 |
| shannon.effective_change | Correlation Coefficient<br>Sig. (2-tailed)<br>N | -,253<br>,115<br>40         | -,154<br>,324<br>43          | ,154<br>,319<br>44        | -,270<br>,080<br>43        | ,007<br>,964<br>42    |
| Richness_change          | Correlation Coefficient<br>Sig. (2-tailed)<br>N | -,211<br>,191<br>40         | -,177<br>,256<br>43          | ,122<br>,431<br>44        | -,326*<br>,033<br>43       | -,070<br>,659<br>42   |
| Evenness_change          | Correlation Coefficient<br>Sig. (2-tailed)<br>N | -,227<br>,159<br>40         | -,045<br>,772<br>43          | ,171<br>,266<br>44        | ,106<br>,498<br>43         | ,124<br>,433<br>42    |
| Actinomyces_change       | Correlation Coefficient<br>Sig. (2-tailed)<br>N | ,268<br>,094<br>40          | ,173<br>,268<br>43           | -,130<br>,401<br>44       | -,006<br>,972<br>43        | ,008<br>,958<br>42    |
| Aerostipes_change        | Correlation Coefficient<br>Sig. (2-tailed)<br>N | -,206<br>,201<br>40         | ,039<br>,806<br>43           | ,021<br>,892<br>44        | ,325*<br>,034<br>43        | -,040<br>,803<br>42   |
| Bifidobacterium_change   | Correlation Coefficient<br>Sig. (2-tailed)<br>N | -,136<br>,401<br>40         | ,098<br>,533<br>43           | -,109<br>,482<br>44       | -,125<br>,425<br>43        | -,225<br>,151<br>42   |
| Blautia_change           | Correlation Coefficient<br>Sig. (2-tailed)<br>N | ,179<br>,270<br>40          | ,084<br>,594<br>43           | ,166<br>,283<br>44        | ,115<br>,465<br>43         | ,163<br>,301<br>42    |

## Correlations

|                          |                         | STPYY_change | STGLPT_chan<br>ge | age   | BMI   | FM_stand | Richness | shannon.<br>effective |
|--------------------------|-------------------------|--------------|-------------------|-------|-------|----------|----------|-----------------------|
| LDL_change               | Correlation Coefficient | ,080         | ,233              | ,052  | ,202  | ,478**   | -,042    | -,119                 |
|                          | Sig. (2-tailed)         | ,615         | ,137              | ,733  | ,179  | ,001     | ,781     | ,430                  |
|                          | N                       | 42           | 42                | 46    | 46    | 46       | 46       | 46                    |
| shannon.effective_change | Correlation Coefficient | -,089        | ,014              | -,019 | -,130 | ,014     | ,490**   | ,570**                |
|                          | Sig. (2-tailed)         | ,575         | ,928              | ,903  | ,395  | ,927     | ,001     | ,000                  |
|                          | N                       | 42           | 42                | 45    | 45    | 45       | 45       | 45                    |
| Richness_change          | Correlation Coefficient | -,204        | -,014             | ,089  | -,105 | ,167     | ,500**   | ,512**                |
|                          | Sig. (2-tailed)         | ,196         | ,931              | ,559  | ,492  | ,274     | ,000     | ,000                  |
|                          | N                       | 42           | 42                | 45    | 45    | 45       | 45       | 45                    |
| Evenness_change          | Correlation Coefficient | ,122         | ,073              | -,205 | -,086 | -,303*   | ,137     | ,306*                 |
|                          | Sig. (2-tailed)         | ,442         | ,644              | ,177  | ,575  | ,043     | ,370     | ,041                  |
|                          | N                       | 42           | 42                | 45    | 45    | 45       | 45       | 45                    |
| Actinomyces_change       | Correlation Coefficient | ,084         | -,030             | -,004 | -,121 | ,085     | -,028    | -,017                 |
|                          | Sig. (2-tailed)         | ,599         | ,852              | ,979  | ,429  | ,577     | ,856     | ,912                  |
|                          | N                       | 42           | 42                | 45    | 45    | 45       | 45       | 45                    |
| Aerostipes_change        | Correlation Coefficient | ,001         | ,067              | -,078 | ,105  | -,157    | ,011     | ,036                  |
|                          | Sig. (2-tailed)         | ,995         | ,673              | ,611  | ,491  | ,305     | ,943     | ,816                  |
|                          | N                       | 42           | 42                | 45    | 45    | 45       | 45       | 45                    |
| Bifidobacterium_change   | Correlation Coefficient | ,012         | ,014              | -,044 | ,013  | ,323*    | -,514**  | -,582**               |
|                          | Sig. (2-tailed)         | ,940         | ,929              | ,774  | ,933  | ,031     | ,000     | ,000                  |
|                          | N                       | 42           | 42                | 45    | 45    | 45       | 45       | 45                    |
| Blautia_change           | Correlation Coefficient | -,021        | ,209              | ,083  | -,132 | -,159    | -,145    | -,055                 |
|                          | Sig. (2-tailed)         | ,894         | ,184              | ,588  | ,387  | ,296     | ,341     | ,722                  |
|                          | N                       | 42           | 42                | 45    | 45    | 45       | 45       | 45                    |

## Correlations

|                          |                         | simpson.<br>effective | Evenness | CHOL_change | LDL_change | shannon.<br>effective | Richness_change |
|--------------------------|-------------------------|-----------------------|----------|-------------|------------|-----------------------|-----------------|
| LDL_change               | Correlation Coefficient | -,149                 | -,082    | ,926**      | 1,000      | -,187                 | -,043           |
|                          | Sig. (2-tailed)         | ,322                  | ,588     | ,000        | .          | ,218                  | ,779            |
|                          | N                       | 46                    | 46       | 46          | 46         | 45                    | 45              |
| shannon.effective_change | Correlation Coefficient | ,586**                | ,347*    | -,144       | -,187      | 1,000                 | ,901**          |
|                          | Sig. (2-tailed)         | ,000                  | ,020     | ,344        | ,218       | .                     | ,000            |
|                          | N                       | 45                    | 45       | 45          | 45         | 45                    | 45              |
| Richness_change          | Correlation Coefficient | ,500**                | ,163     | ,038        | -,043      | ,901**                | 1,000           |
|                          | Sig. (2-tailed)         | ,000                  | ,285     | ,806        | ,779       | ,000                  | .               |
|                          | N                       | 45                    | 45       | 45          | 45         | 45                    | 45              |
| Evenness_change          | Correlation Coefficient | ,373*                 | ,600**   | -,308*      | -,206      | ,451**                | ,062            |
|                          | Sig. (2-tailed)         | ,012                  | ,000     | ,039        | ,175       | ,002                  | ,687            |
|                          | N                       | 45                    | 45       | 45          | 45         | 45                    | 45              |
| Actinomyces_change       | Correlation Coefficient | -,085                 | ,010     | ,118        | ,092       | ,176                  | ,275            |
|                          | Sig. (2-tailed)         | ,577                  | ,949     | ,441        | ,547       | ,247                  | ,067            |
|                          | N                       | 45                    | 45       | 45          | 45         | 45                    | 45              |
| Aerostipes_change        | Correlation Coefficient | ,058                  | ,155     | -,260       | -,246      | -,101                 | -,185           |
|                          | Sig. (2-tailed)         | ,703                  | ,309     | ,084        | ,103       | ,508                  | ,223            |
|                          | N                       | 45                    | 45       | 45          | 45         | 45                    | 45              |
| Bifidobacterium_change   | Correlation Coefficient | -,626**               | -,401**  | ,153        | ,145       | -,414**               | -,300*          |
|                          | Sig. (2-tailed)         | ,000                  | ,006     | ,316        | ,343       | ,005                  | ,045            |
|                          | N                       | 45                    | 45       | 45          | 45         | 45                    | 45              |
| Blautia_change           | Correlation Coefficient | -,032                 | ,355*    | -,016       | -,062      | ,010                  | -,036           |
|                          | Sig. (2-tailed)         | ,833                  | ,017     | ,914        | ,684       | ,947                  | ,817            |
|                          | N                       | 45                    | 45       | 45          | 45         | 45                    | 45              |

## Correlations

|                          |                         | Evenness_chan<br>ge | Actinomyces_c<br>hange | Aerostipes_cha<br>nge | Bifidobacterium<br>_change | Blautia_change | Collinsella_cha<br>nge |
|--------------------------|-------------------------|---------------------|------------------------|-----------------------|----------------------------|----------------|------------------------|
| LDL_change               | Correlation Coefficient | -,206               | ,092                   | -,246                 | ,145                       | -,062          | ,085                   |
|                          | Sig. (2-tailed)         | ,175                | ,547                   | ,103                  | ,343                       | ,684           | ,580                   |
|                          | N                       | 45                  | 45                     | 45                    | 45                         | 45             | 45                     |
| shannon.effective_change | Correlation Coefficient | ,451**              | ,176                   | -,101                 | -,414**                    | ,010           | -,269                  |
|                          | Sig. (2-tailed)         | ,002                | ,247                   | ,508                  | ,005                       | ,947           | ,074                   |
|                          | N                       | 45                  | 45                     | 45                    | 45                         | 45             | 45                     |
| Richness_change          | Correlation Coefficient | ,062                | ,275                   | -,185                 | -,300*                     | -,036          | -,256                  |
|                          | Sig. (2-tailed)         | ,687                | ,067                   | ,223                  | ,045                       | ,817           | ,090                   |
|                          | N                       | 45                  | 45                     | 45                    | 45                         | 45             | 45                     |
| Evenness_change          | Correlation Coefficient | 1,000               | -,099                  | ,142                  | -,427**                    | ,167           | -,115                  |
|                          | Sig. (2-tailed)         | .                   | ,516                   | ,352                  | ,003                       | ,273           | ,452                   |
|                          | N                       | 45                  | 45                     | 45                    | 45                         | 45             | 45                     |
| Actinomyces_change       | Correlation Coefficient | -,099               | 1,000                  | -,172                 | ,075                       | ,364*          | ,391**                 |
|                          | Sig. (2-tailed)         | ,516                | .                      | ,259                  | ,626                       | ,014           | ,008                   |
|                          | N                       | 45                  | 45                     | 45                    | 45                         | 45             | 45                     |
| Aerostipes_change        | Correlation Coefficient | ,142                | -,172                  | 1,000                 | -,064                      | -,023          | -,083                  |
|                          | Sig. (2-tailed)         | ,352                | ,259                   | .                     | ,675                       | ,881           | ,587                   |
|                          | N                       | 45                  | 45                     | 45                    | 45                         | 45             | 45                     |
| Bifidobacterium_change   | Correlation Coefficient | -,427**             | ,075                   | -,064                 | 1,000                      | -,024          | ,312*                  |
|                          | Sig. (2-tailed)         | ,003                | ,626                   | ,675                  | .                          | ,876           | ,037                   |
|                          | N                       | 45                  | 45                     | 45                    | 45                         | 45             | 45                     |
| Blautia_change           | Correlation Coefficient | ,167                | ,364*                  | -,023                 | -,024                      | 1,000          | ,173                   |
|                          | Sig. (2-tailed)         | ,273                | ,014                   | ,881                  | ,876                       | .              | ,256                   |
|                          | N                       | 45                  | 45                     | 45                    | 45                         | 45             | 45                     |

## Correlations

|                          |                         | Desulfovibrio_c<br>hange | Eggerthella_ch<br>ange | Erysipelatoclost<br>ridium_ch<br>ange | Faecalitalea_ch<br>ange | Family.XIII.<br>AD3011.<br>group_change | Family.XIII.<br>UCG.<br>001_change |
|--------------------------|-------------------------|--------------------------|------------------------|---------------------------------------|-------------------------|-----------------------------------------|------------------------------------|
| LDL_change               | Correlation Coefficient | -,147                    | ,137                   | ,160                                  | -,170                   | -,126                                   | -,286                              |
|                          | Sig. (2-tailed)         | ,334                     | ,371                   | ,295                                  | ,263                    | ,409                                    | ,056                               |
|                          | N                       | 45                       | 45                     | 45                                    | 45                      | 45                                      | 45                                 |
| shannon.effective_change | Correlation Coefficient | ,041                     | -,006                  | ,287                                  | -,093                   | ,334*                                   | ,194                               |
|                          | Sig. (2-tailed)         | ,791                     | ,966                   | ,056                                  | ,543                    | ,025                                    | ,201                               |
|                          | N                       | 45                       | 45                     | 45                                    | 45                      | 45                                      | 45                                 |
| Richness_change          | Correlation Coefficient | ,028                     | ,091                   | ,267                                  | -,076                   | ,297*                                   | ,180                               |
|                          | Sig. (2-tailed)         | ,857                     | ,552                   | ,077                                  | ,620                    | ,048                                    | ,237                               |
|                          | N                       | 45                       | 45                     | 45                                    | 45                      | 45                                      | 45                                 |
| Evenness_change          | Correlation Coefficient | ,122                     | -,169                  | ,145                                  | -,015                   | ,144                                    | ,090                               |
|                          | Sig. (2-tailed)         | ,423                     | ,268                   | ,341                                  | ,921                    | ,345                                    | ,557                               |
|                          | N                       | 45                       | 45                     | 45                                    | 45                      | 45                                      | 45                                 |
| Actinomyces_change       | Correlation Coefficient | -,057                    | ,254                   | -,007                                 | ,178                    | ,214                                    | -,189                              |
|                          | Sig. (2-tailed)         | ,711                     | ,092                   | ,966                                  | ,243                    | ,159                                    | ,214                               |
|                          | N                       | 45                       | 45                     | 45                                    | 45                      | 45                                      | 45                                 |
| Aerostipes_change        | Correlation Coefficient | ,062                     | -,320*                 | -,375*                                | ,193                    | ,098                                    | ,233                               |
|                          | Sig. (2-tailed)         | ,684                     | ,032                   | ,011                                  | ,205                    | ,524                                    | ,124                               |
|                          | N                       | 45                       | 45                     | 45                                    | 45                      | 45                                      | 45                                 |
| Bifidobacterium_change   | Correlation Coefficient | -,004                    | ,083                   | -,023                                 | ,070                    | -,494**                                 | -,305*                             |
|                          | Sig. (2-tailed)         | ,978                     | ,587                   | ,879                                  | ,650                    | ,001                                    | ,042                               |
|                          | N                       | 45                       | 45                     | 45                                    | 45                      | 45                                      | 45                                 |
| Blautia_change           | Correlation Coefficient | ,021                     | ,208                   | ,012                                  | ,088                    | ,014                                    | -,103                              |
|                          | Sig. (2-tailed)         | ,891                     | ,171                   | ,937                                  | ,566                    | ,927                                    | ,499                               |
|                          | N                       | 45                       | 45                     | 45                                    | 45                      | 45                                      | 45                                 |



## Correlations

|                          |                         | Gemella_chang<br>e | Gordombacter_<br>change | Holdemania_<br>change | Holdemania_ch<br>ange | Lachnospiracea<br>e.FCS020.<br>group_change | Lachnospiracea<br>e.NK4A136.<br>group_change |
|--------------------------|-------------------------|--------------------|-------------------------|-----------------------|-----------------------|---------------------------------------------|----------------------------------------------|
| LDL_change               | Correlation Coefficient | ,118               | ,030                    | ,119                  | -,187                 | ,198                                        | ,030                                         |
|                          | Sig. (2-tailed)         | ,439               | ,847                    | ,437                  | ,219                  | ,193                                        | ,846                                         |
|                          | N                       | 45                 | 45                      | 45                    | 45                    | 45                                          | 45                                           |
| shannon.effective_change | Correlation Coefficient | ,046               | ,213                    | ,130                  | ,129                  | ,090                                        | ,325*                                        |
|                          | Sig. (2-tailed)         | ,766               | ,160                    | ,395                  | ,400                  | ,555                                        | ,029                                         |
|                          | N                       | 45                 | 45                      | 45                    | 45                    | 45                                          | 45                                           |
| Richness_change          | Correlation Coefficient | ,103               | ,319*                   | ,156                  | ,157                  | ,105                                        | ,289                                         |
|                          | Sig. (2-tailed)         | ,501               | ,033                    | ,305                  | ,304                  | ,493                                        | ,055                                         |
|                          | N                       | 45                 | 45                      | 45                    | 45                    | 45                                          | 45                                           |
| Evenness_change          | Correlation Coefficient | -,096              | -,097                   | -,017                 | ,045                  | ,062                                        | ,138                                         |
|                          | Sig. (2-tailed)         | ,532               | ,527                    | ,911                  | ,772                  | ,686                                        | ,365                                         |
|                          | N                       | 45                 | 45                      | 45                    | 45                    | 45                                          | 45                                           |
| Actinomyces_change       | Correlation Coefficient | ,497**             | ,141                    | ,092                  | -,328*                | ,082                                        | -,158                                        |
|                          | Sig. (2-tailed)         | ,001               | ,357                    | ,548                  | ,028                  | ,592                                        | ,300                                         |
|                          | N                       | 45                 | 45                      | 45                    | 45                    | 45                                          | 45                                           |
| Aerostipes_change        | Correlation Coefficient | -,093              | -,081                   | ,068                  | ,138                  | -,184                                       | -,157                                        |
|                          | Sig. (2-tailed)         | ,542               | ,595                    | ,657                  | ,366                  | ,227                                        | ,302                                         |
|                          | N                       | 45                 | 45                      | 45                    | 45                    | 45                                          | 45                                           |
| Bifidobacterium_change   | Correlation Coefficient | ,039               | -,351*                  | -,172                 | -,160                 | -,103                                       | -,370*                                       |
|                          | Sig. (2-tailed)         | ,799               | ,018                    | ,258                  | ,294                  | ,499                                        | ,012                                         |
|                          | N                       | 45                 | 45                      | 45                    | 45                    | 45                                          | 45                                           |
| Blautia_change           | Correlation Coefficient | ,547**             | ,121                    | ,251                  | -,244                 | ,216                                        | -,377*                                       |
|                          | Sig. (2-tailed)         | ,000               | ,427                    | ,096                  | ,106                  | ,154                                        | ,011                                         |
|                          | N                       | 45                 | 45                      | 45                    | 45                    | 45                                          | 45                                           |

## Correlations

|                          |                         | Lactiplantibacillus_change | Lactobacillus_change | Libanicoccus_change | Ligilactobacillus_change | Limosilactobacillus_change | Roseburia_change |
|--------------------------|-------------------------|----------------------------|----------------------|---------------------|--------------------------|----------------------------|------------------|
| LDL_change               | Correlation Coefficient | -,114                      | ,255                 | -,003               | ,011                     | -,056                      | -,021            |
|                          | Sig. (2-tailed)         | ,455                       | ,091                 | ,986                | ,941                     | ,713                       | ,893             |
|                          | N                       | 45                         | 45                   | 45                  | 45                       | 45                         | 45               |
| shannon.effective_change | Correlation Coefficient | -,116                      | -,398**              | -,164               | ,006                     | ,038                       | ,107             |
|                          | Sig. (2-tailed)         | ,446                       | ,007                 | ,281                | ,969                     | ,803                       | ,485             |
|                          | N                       | 45                         | 45                   | 45                  | 45                       | 45                         | 45               |
| Richness_change          | Correlation Coefficient | -,049                      | -,220                | -,170               | -,101                    | ,025                       | ,211             |
|                          | Sig. (2-tailed)         | ,751                       | ,147                 | ,264                | ,508                     | ,872                       | ,165             |
|                          | N                       | 45                         | 45                   | 45                  | 45                       | 45                         | 45               |
| Evenness_change          | Correlation Coefficient | -,240                      | -,370*               | ,053                | ,320*                    | -,008                      | -,188            |
|                          | Sig. (2-tailed)         | ,112                       | ,012                 | ,732                | ,032                     | ,958                       | ,216             |
|                          | N                       | 45                         | 45                   | 45                  | 45                       | 45                         | 45               |
| Actinomyces_change       | Correlation Coefficient | ,225                       | -,099                | -,038               | ,003                     | -,038                      | -,040            |
|                          | Sig. (2-tailed)         | ,137                       | ,519                 | ,803                | ,982                     | ,806                       | ,792             |
|                          | N                       | 45                         | 45                   | 45                  | 45                       | 45                         | 45               |
| Aerostipes_change        | Correlation Coefficient | -,043                      | -,033                | ,071                | -,024                    | ,228                       | -,111            |
|                          | Sig. (2-tailed)         | ,779                       | ,828                 | ,643                | ,874                     | ,132                       | ,468             |
|                          | N                       | 45                         | 45                   | 45                  | 45                       | 45                         | 45               |
| Bifidobacterium_change   | Correlation Coefficient | ,360*                      | ,159                 | ,153                | ,072                     | ,077                       | ,142             |
|                          | Sig. (2-tailed)         | ,015                       | ,297                 | ,315                | ,640                     | ,616                       | ,353             |
|                          | N                       | 45                         | 45                   | 45                  | 45                       | 45                         | 45               |
| Blautia_change           | Correlation Coefficient | ,258                       | -,086                | ,051                | ,133                     | ,093                       | -,313*           |
|                          | Sig. (2-tailed)         | ,087                       | ,575                 | ,741                | ,384                     | ,542                       | ,037             |
|                          | N                       | 45                         | 45                   | 45                  | 45                       | 45                         | 45               |

## Correlations

|                          |                         | Shuttleworthia_<br>change | Subdoligranulu<br>m_change | UCG.<br>003_change | Xi.Eubacterium..<br>brachy.<br>group_change | X.<br>Ruminococcus.<br>.gavvreauii.<br>group_change | X.<br>Ruminococcus.<br>.torques.<br>group_change |
|--------------------------|-------------------------|---------------------------|----------------------------|--------------------|---------------------------------------------|-----------------------------------------------------|--------------------------------------------------|
| LDL_change               | Correlation Coefficient | ,231                      | -,104                      | -,018              | -,050                                       | ,241                                                | -,037                                            |
|                          | Sig. (2-tailed)         | ,126                      | ,496                       | ,907               | ,745                                        | ,111                                                | ,812                                             |
|                          | N                       | 45                        | 45                         | 45                 | 45                                          | 45                                                  | 45                                               |
| shannon.effective_change | Correlation Coefficient | -,047                     | ,162                       | ,051               | ,281                                        | ,010                                                | ,083                                             |
|                          | Sig. (2-tailed)         | ,758                      | ,288                       | ,738               | ,061                                        | ,950                                                | ,586                                             |
|                          | N                       | 45                        | 45                         | 45                 | 45                                          | 45                                                  | 45                                               |
| Richness_change          | Correlation Coefficient | ,056                      | ,054                       | ,088               | ,364*                                       | -,028                                               | ,019                                             |
|                          | Sig. (2-tailed)         | ,717                      | ,722                       | ,567               | ,014                                        | ,854                                                | ,904                                             |
|                          | N                       | 45                        | 45                         | 45                 | 45                                          | 45                                                  | 45                                               |
| Evenness_change          | Correlation Coefficient | -,228                     | ,348*                      | -,141              | -,061                                       | ,121                                                | ,242                                             |
|                          | Sig. (2-tailed)         | ,132                      | ,019                       | ,357               | ,689                                        | ,428                                                | ,109                                             |
|                          | N                       | 45                        | 45                         | 45                 | 45                                          | 45                                                  | 45                                               |
| Actinomyces_change       | Correlation Coefficient | -,089                     | ,121                       | -,185              | ,205                                        | ,018                                                | ,286                                             |
|                          | Sig. (2-tailed)         | ,561                      | ,428                       | ,225               | ,178                                        | ,908                                                | ,056                                             |
|                          | N                       | 45                        | 45                         | 45                 | 45                                          | 45                                                  | 45                                               |
| Aerostipes_change        | Correlation Coefficient | -,052                     | ,163                       | -,084              | ,134                                        | -,190                                               | ,134                                             |
|                          | Sig. (2-tailed)         | ,735                      | ,285                       | ,582               | ,381                                        | ,211                                                | ,380                                             |
|                          | N                       | 45                        | 45                         | 45                 | 45                                          | 45                                                  | 45                                               |
| Bifidobacterium_change   | Correlation Coefficient | ,255                      | -,264                      | -,189              | -,085                                       | ,233                                                | -,128                                            |
|                          | Sig. (2-tailed)         | ,091                      | ,079                       | ,215               | ,580                                        | ,124                                                | ,402                                             |
|                          | N                       | 45                        | 45                         | 45                 | 45                                          | 45                                                  | 45                                               |
| Blautia_change           | Correlation Coefficient | -,246                     | ,239                       | -,396**            | ,195                                        | ,209                                                | ,288                                             |
|                          | Sig. (2-tailed)         | ,104                      | ,114                       | ,007               | ,199                                        | ,169                                                | ,055                                             |
|                          | N                       | 45                        | 45                         | 45                 | 45                                          | 45                                                  | 45                                               |

## Correlations

|                                 | interaction_VTA<br>_change                      | interaction_rOF<br>C_change | interaction_rmO<br>FC_change | sumscore_GIQ<br>LI_change | Stool_frequenc<br>y_change | STGHRE_chan<br>ge   |
|---------------------------------|-------------------------------------------------|-----------------------------|------------------------------|---------------------------|----------------------------|---------------------|
| Collinsella_change              | Correlation Coefficient<br>Sig. (2-tailed)<br>N | ,024<br>,878<br>43          | ,178<br>,271<br>40           | ,150<br>,339<br>43        | -,202<br>,189<br>44        | ,151<br>,333<br>43  |
| Desulfovibrio_change            | Correlation Coefficient<br>Sig. (2-tailed)<br>N | ,034<br>,830<br>43          | -,009<br>,955<br>40          | -,084<br>,591<br>43       | ,059<br>,704<br>44         | ,066<br>,674<br>43  |
| Eggerthella_change              | Correlation Coefficient<br>Sig. (2-tailed)<br>N | ,020<br>,899<br>43          | ,022<br>,892<br>40           | -,027<br>,862<br>43       | ,104<br>,503<br>44         | -,131<br>,403<br>43 |
| Erysipelatoclostridium_change   | Correlation Coefficient<br>Sig. (2-tailed)<br>N | ,159<br>,309<br>43          | -,021<br>,900<br>40          | -,063<br>,688<br>43       | ,190<br>,216<br>44         | -,291<br>,058<br>43 |
| Faecalitalea_change             | Correlation Coefficient<br>Sig. (2-tailed)<br>N | -,099<br>,526<br>43         | -,018<br>,911<br>40          | ,035<br>,825<br>43        | ,038<br>,809<br>44         | -,040<br>,798<br>43 |
| Family.XIII.AD3011_group_change | Correlation Coefficient<br>Sig. (2-tailed)<br>N | ,121<br>,440<br>43          | ,191<br>,238<br>40           | ,070<br>,655<br>43        | ,180<br>,241<br>44         | ,250<br>,105<br>43  |
| Family.XIII.UCG.001_change      | Correlation Coefficient<br>Sig. (2-tailed)<br>N | -,080<br>,611<br>43         | ,064<br>,696<br>40           | -,206<br>,185<br>43       | ,009<br>,953<br>44         | -,054<br>,731<br>43 |
| Gemella_change                  | Correlation Coefficient<br>Sig. (2-tailed)<br>N | -,174<br>,264<br>43         | ,295<br>,064<br>40           | ,196<br>,209<br>43        | ,086<br>,577<br>44         | -,119<br>,445<br>43 |

## Correlations

|                                 |                         | STPYY_change | STGLPT_chan<br>ge | age   | BMI   | FM_stand | Richness | shannon.<br>effective |
|---------------------------------|-------------------------|--------------|-------------------|-------|-------|----------|----------|-----------------------|
| Collinsella_change              | Correlation Coefficient | ,176         | ,004              | -,228 | -,035 | ,013     | -,354*   | -,322*                |
|                                 | Sig. (2-tailed)         | ,266         | ,978              | ,133  | ,820  | ,932     | ,017     | ,031                  |
|                                 | N                       | 42           | 42                | 45    | 45    | 45       | 45       | 45                    |
| Desulfovibrio_change            | Correlation Coefficient | -,370*       | -,069             | ,135  | -,268 | -,284    | -,048    | -,048                 |
|                                 | Sig. (2-tailed)         | ,016         | ,666              | ,378  | ,075  | ,059     | ,753     | ,755                  |
|                                 | N                       | 42           | 42                | 45    | 45    | 45       | 45       | 45                    |
| Eggerthella_change              | Correlation Coefficient | ,032         | ,103              | ,151  | ,107  | ,228     | ,118     | ,104                  |
|                                 | Sig. (2-tailed)         | ,839         | ,518              | ,322  | ,485  | ,131     | ,438     | ,498                  |
|                                 | N                       | 42           | 42                | 45    | 45    | 45       | 45       | 45                    |
| Erysipelatoclostridium_change   | Correlation Coefficient | -,017        | ,296              | ,005  | ,250  | ,207     | ,120     | ,112                  |
|                                 | Sig. (2-tailed)         | ,913         | ,057              | ,973  | ,097  | ,172     | ,433     | ,464                  |
|                                 | N                       | 42           | 42                | 45    | 45    | 45       | 45       | 45                    |
| Faecalitalea_change             | Correlation Coefficient | ,011         | ,090              | -,041 | ,041  | ,055     | ,011     | ,026                  |
|                                 | Sig. (2-tailed)         | ,945         | ,570              | ,788  | ,791  | ,721     | ,942     | ,864                  |
|                                 | N                       | 42           | 42                | 45    | 45    | 45       | 45       | 45                    |
| Family.XIII.AD3011_group_change | Correlation Coefficient | ,171         | ,058              | -,057 | ,033  | -,024    | ,350*    | ,325*                 |
|                                 | Sig. (2-tailed)         | ,279         | ,717              | ,711  | ,831  | ,876     | ,018     | ,029                  |
|                                 | N                       | 42           | 42                | 45    | 45    | 45       | 45       | 45                    |
| Family.XIII.UCG.001_change      | Correlation Coefficient | ,017         | ,205              | ,067  | -,199 | -,306*   | ,256     | ,236                  |
|                                 | Sig. (2-tailed)         | ,913         | ,192              | ,663  | ,190  | ,041     | ,090     | ,119                  |
|                                 | N                       | 42           | 42                | 45    | 45    | 45       | 45       | 45                    |
| Gemella_change                  | Correlation Coefficient | -,139        | ,150              | ,200  | -,204 | -,199    | -,070    | -,050                 |
|                                 | Sig. (2-tailed)         | ,381         | ,342              | ,187  | ,180  | ,189     | ,648     | ,745                  |
|                                 | N                       | 42           | 42                | 45    | 45    | 45       | 45       | 45                    |

## Correlations

|                                 |                         | simpson.<br>effective | Evenness | CHOL_change | LDL_change | shannon.<br>effective | Richness_change |
|---------------------------------|-------------------------|-----------------------|----------|-------------|------------|-----------------------|-----------------|
| Collinsella_change              | Correlation Coefficient | -,369*                | -,060    | ,110        | ,085       | -,269                 | -,256           |
|                                 | Sig. (2-tailed)         | ,012                  | ,697     | ,474        | ,580       | ,074                  | ,090            |
|                                 | N                       | 45                    | 45       | 45          | 45         | 45                    | 45              |
| Desulfovibrio_change            | Correlation Coefficient | -,059                 | -,091    | -,270       | -,147      | ,041                  | ,028            |
|                                 | Sig. (2-tailed)         | ,699                  | ,553     | ,073        | ,334       | ,791                  | ,857            |
|                                 | N                       | 45                    | 45       | 45          | 45         | 45                    | 45              |
| Eggerthella_change              | Correlation Coefficient | ,084                  | ,081     | ,203        | ,137       | -,006                 | ,091            |
|                                 | Sig. (2-tailed)         | ,583                  | ,595     | ,181        | ,371       | ,966                  | ,552            |
|                                 | N                       | 45                    | 45       | 45          | 45         | 45                    | 45              |
| Erysipelatoclostridium_change   | Correlation Coefficient | ,126                  | -,016    | ,152        | ,160       | ,287                  | ,267            |
|                                 | Sig. (2-tailed)         | ,408                  | ,919     | ,318        | ,295       | ,056                  | ,077            |
|                                 | N                       | 45                    | 45       | 45          | 45         | 45                    | 45              |
| Faecalitalea_change             | Correlation Coefficient | ,041                  | ,117     | -,149       | -,170      | -,093                 | -,076           |
|                                 | Sig. (2-tailed)         | ,788                  | ,443     | ,328        | ,263       | ,543                  | ,620            |
|                                 | N                       | 45                    | 45       | 45          | 45         | 45                    | 45              |
| Family.XIII.AD3011_group_change | Correlation Coefficient | ,293                  | ,022     | -,174       | -,126      | ,334*                 | ,297*           |
|                                 | Sig. (2-tailed)         | ,051                  | ,885     | ,253        | ,409       | ,025                  | ,048            |
|                                 | N                       | 45                    | 45       | 45          | 45         | 45                    | 45              |
| Family.XIII.UCG.001_change      | Correlation Coefficient | ,240                  | -,001    | -,319*      | -,286      | ,194                  | ,180            |
|                                 | Sig. (2-tailed)         | ,113                  | ,996     | ,033        | ,056       | ,201                  | ,237            |
|                                 | N                       | 45                    | 45       | 45          | 45         | 45                    | 45              |
| Gemella_change                  | Correlation Coefficient | -,066                 | -,034    | ,155        | ,118       | ,046                  | ,103            |
|                                 | Sig. (2-tailed)         | ,667                  | ,824     | ,311        | ,439       | ,766                  | ,501            |
|                                 | N                       | 45                    | 45       | 45          | 45         | 45                    | 45              |

## Correlations

|                                 |                         | Evenness_change | Actinomyces_change | Aerostipes_change | Bifidobacterium_change | Blautia_change | Collinsella_change |
|---------------------------------|-------------------------|-----------------|--------------------|-------------------|------------------------|----------------|--------------------|
| Collinsella_change              | Correlation Coefficient | -,115           | ,391**             | -,083             | ,312*                  | ,173           | 1,000              |
|                                 | Sig. (2-tailed)         | ,452            | ,008               | ,587              | ,037                   | ,256           | .                  |
|                                 | N                       | 45              | 45                 | 45                | 45                     | 45             | 45                 |
| Desulfovibrio_change            | Correlation Coefficient | ,122            | -,057              | ,062              | -,004                  | ,021           | -,270              |
|                                 | Sig. (2-tailed)         | ,423            | ,711               | ,684              | ,978                   | ,891           | ,073               |
|                                 | N                       | 45              | 45                 | 45                | 45                     | 45             | 45                 |
| Eggerthella_change              | Correlation Coefficient | -,169           | ,254               | -,320*            | ,083                   | ,208           | -,016              |
|                                 | Sig. (2-tailed)         | ,268            | ,092               | ,032              | ,587                   | ,171           | ,919               |
|                                 | N                       | 45              | 45                 | 45                | 45                     | 45             | 45                 |
| Erysipelatoclostridium_change   | Correlation Coefficient | ,145            | -,007              | -,375*            | -,023                  | ,012           | ,054               |
|                                 | Sig. (2-tailed)         | ,341            | ,966               | ,011              | ,879                   | ,937           | ,724               |
|                                 | N                       | 45              | 45                 | 45                | 45                     | 45             | 45                 |
| Faecalitalea_change             | Correlation Coefficient | -,015           | ,178               | ,193              | ,070                   | ,088           | -,073              |
|                                 | Sig. (2-tailed)         | ,921            | ,243               | ,205              | ,650                   | ,566           | ,632               |
|                                 | N                       | 45              | 45                 | 45                | 45                     | 45             | 45                 |
| Family.XIII.AD3011_group_change | Correlation Coefficient | ,144            | ,214               | ,098              | -,494**                | ,014           | -,084              |
|                                 | Sig. (2-tailed)         | ,345            | ,159               | ,524              | ,001                   | ,927           | ,583               |
|                                 | N                       | 45              | 45                 | 45                | 45                     | 45             | 45                 |
| Family.XIII.UCG.001_change      | Correlation Coefficient | ,090            | -,189              | ,233              | -,305*                 | -,103          | -,363*             |
|                                 | Sig. (2-tailed)         | ,557            | ,214               | ,124              | ,042                   | ,499           | ,014               |
|                                 | N                       | 45              | 45                 | 45                | 45                     | 45             | 45                 |
| Gemella_change                  | Correlation Coefficient | -,096           | ,497**             | -,093             | ,039                   | ,547**         | ,322*              |
|                                 | Sig. (2-tailed)         | ,532            | ,001               | ,542              | ,799                   | ,000           | ,031               |
|                                 | N                       | 45              | 45                 | 45                | 45                     | 45             | 45                 |

## Correlations

|                                     |                         | Desulfovibrio_c<br>change | Eggerthella_ch<br>ange | Erysipelatoclost<br>ridium_change | Faecalitalea_ch<br>ange | Family.XIII.<br>AD3011.<br>group_change | Family.XIII.<br>UCG.<br>001_change |
|-------------------------------------|-------------------------|---------------------------|------------------------|-----------------------------------|-------------------------|-----------------------------------------|------------------------------------|
| Collinsella_change                  | Correlation Coefficient | -,270                     | -,016                  | ,054                              | -,073                   | -,084                                   | -,363*                             |
|                                     | Sig. (2-tailed)         | ,073                      | ,919                   | ,724                              | ,632                    | ,583                                    | ,014                               |
|                                     | N                       | 45                        | 45                     | 45                                | 45                      | 45                                      | 45                                 |
| Desulfovibrio_change                | Correlation Coefficient | 1,000                     | -,155                  | ,038                              | ,067                    | -,074                                   | ,158                               |
|                                     | Sig. (2-tailed)         | .                         | ,311                   | ,805                              | ,663                    | ,629                                    | ,300                               |
|                                     | N                       | 45                        | 45                     | 45                                | 45                      | 45                                      | 45                                 |
| Eggerthella_change                  | Correlation Coefficient | -,155                     | 1,000                  | ,224                              | ,365*                   | -,051                                   | -,217                              |
|                                     | Sig. (2-tailed)         | ,311                      | .                      | ,139                              | ,014                    | ,737                                    | ,151                               |
|                                     | N                       | 45                        | 45                     | 45                                | 45                      | 45                                      | 45                                 |
| Erysipelatoclostridium_change       | Correlation Coefficient | ,038                      | ,224                   | 1,000                             | ,148                    | ,065                                    | ,064                               |
|                                     | Sig. (2-tailed)         | ,805                      | ,139                   | .                                 | ,331                    | ,673                                    | ,676                               |
|                                     | N                       | 45                        | 45                     | 45                                | 45                      | 45                                      | 45                                 |
| Faecalitalea_change                 | Correlation Coefficient | ,067                      | ,365*                  | ,148                              | 1,000                   | -,136                                   | ,064                               |
|                                     | Sig. (2-tailed)         | ,663                      | ,014                   | ,331                              | .                       | ,374                                    | ,678                               |
|                                     | N                       | 45                        | 45                     | 45                                | 45                      | 45                                      | 45                                 |
| Family.XIII.AD3011.<br>group_change | Correlation Coefficient | -,074                     | -,051                  | ,065                              | -,136                   | 1,000                                   | ,249                               |
|                                     | Sig. (2-tailed)         | ,629                      | ,737                   | ,673                              | ,374                    | .                                       | ,100                               |
|                                     | N                       | 45                        | 45                     | 45                                | 45                      | 45                                      | 45                                 |
| Family.XIII.UCG.<br>001_change      | Correlation Coefficient | ,158                      | -,217                  | ,064                              | ,064                    | ,249                                    | 1,000                              |
|                                     | Sig. (2-tailed)         | ,300                      | ,151                   | ,676                              | ,678                    | ,100                                    | .                                  |
|                                     | N                       | 45                        | 45                     | 45                                | 45                      | 45                                      | 45                                 |
| Gemella_change                      | Correlation Coefficient | ,194                      | ,023                   | ,101                              | ,008                    | -,021                                   | -,127                              |
|                                     | Sig. (2-tailed)         | ,202                      | ,879                   | ,510                              | ,957                    | ,893                                    | ,405                               |
|                                     | N                       | 45                        | 45                     | 45                                | 45                      | 45                                      | 45                                 |



## Correlations

|                                     |                         | Gemella_chang<br>e | Gordoniibacter_<br>change | Holdemania_<br>change | Holdemania_<br>change | Lachnospiracea<br>e.FCS020.<br>group_change | Lachnospiracea<br>e.NK4A136.<br>group_change |
|-------------------------------------|-------------------------|--------------------|---------------------------|-----------------------|-----------------------|---------------------------------------------|----------------------------------------------|
| Collinsella_change                  | Correlation Coefficient | ,322*              | -,052                     | ,071                  | -,286                 | ,106                                        | -,529**                                      |
|                                     | Sig. (2-tailed)         | ,031               | ,737                      | ,644                  | ,057                  | ,489                                        | ,000                                         |
|                                     | N                       | 45                 | 45                        | 45                    | 45                    | 45                                          | 45                                           |
| Desulfovibrio_change                | Correlation Coefficient | ,194               | -,078                     | -,030                 | ,003                  | -,042                                       | -,024                                        |
|                                     | Sig. (2-tailed)         | ,202               | ,610                      | ,845                  | ,986                  | ,782                                        | ,873                                         |
|                                     | N                       | 45                 | 45                        | 45                    | 45                    | 45                                          | 45                                           |
| Eggerthella_change                  | Correlation Coefficient | ,023               | ,384**                    | ,098                  | ,139                  | ,020                                        | -,054                                        |
|                                     | Sig. (2-tailed)         | ,879               | ,009                      | ,521                  | ,362                  | ,897                                        | ,727                                         |
|                                     | N                       | 45                 | 45                        | 45                    | 45                    | 45                                          | 45                                           |
| Erysipelatoclostridium_<br>change   | Correlation Coefficient | ,101               | ,224                      | ,088                  | -,060                 | ,162                                        | ,052                                         |
|                                     | Sig. (2-tailed)         | ,510               | ,140                      | ,566                  | ,694                  | ,288                                        | ,736                                         |
|                                     | N                       | 45                 | 45                        | 45                    | 45                    | 45                                          | 45                                           |
| Faecalitalea_change                 | Correlation Coefficient | ,008               | ,183                      | ,085                  | ,040                  | -,221                                       | -,278                                        |
|                                     | Sig. (2-tailed)         | ,957               | ,230                      | ,581                  | ,794                  | ,145                                        | ,064                                         |
|                                     | N                       | 45                 | 45                        | 45                    | 45                    | 45                                          | 45                                           |
| Family.XIII.AD3011.<br>group_change | Correlation Coefficient | -,021              | -,040                     | ,227                  | -,016                 | ,038                                        | ,335*                                        |
|                                     | Sig. (2-tailed)         | ,893               | ,792                      | ,134                  | ,916                  | ,802                                        | ,024                                         |
|                                     | N                       | 45                 | 45                        | 45                    | 45                    | 45                                          | 45                                           |
| Family.XIII.UCG.<br>001_change      | Correlation Coefficient | -,127              | -,023                     | -,114                 | ,170                  | ,064                                        | ,207                                         |
|                                     | Sig. (2-tailed)         | ,405               | ,879                      | ,458                  | ,263                  | ,676                                        | ,172                                         |
|                                     | N                       | 45                 | 45                        | 45                    | 45                    | 45                                          | 45                                           |
| Gemella_change                      | Correlation Coefficient | 1,000              | ,128                      | ,330*                 | -,465**               | ,300*                                       | -,431**                                      |
|                                     | Sig. (2-tailed)         | .                  | ,402                      | ,027                  | ,001                  | ,045                                        | ,003                                         |
|                                     | N                       | 45                 | 45                        | 45                    | 45                    | 45                                          | 45                                           |

## Correlations

|                                 |                         | Lactiplantibacillus_change | Lactobacillus_change | Libanicoccus_change | Ligilactobacillus_change | Limosilactobacillus_change | Roseburia_change |
|---------------------------------|-------------------------|----------------------------|----------------------|---------------------|--------------------------|----------------------------|------------------|
| Collinsella_change              | Correlation Coefficient | ,286                       | -,006                | ,077                | ,218                     | ,132                       | -,219            |
|                                 | Sig. (2-tailed)         | ,057                       | ,969                 | ,614                | ,150                     | ,388                       | ,149             |
|                                 | N                       | 45                         | 45                   | 45                  | 45                       | 45                         | 45               |
| Desulfovibrio_change            | Correlation Coefficient | -,018                      | ,201                 | ,338*               | -,054                    | ,258                       | ,130             |
|                                 | Sig. (2-tailed)         | ,905                       | ,186                 | ,023                | ,725                     | ,087                       | ,393             |
|                                 | N                       | 45                         | 45                   | 45                  | 45                       | 45                         | 45               |
| Eggerthella_change              | Correlation Coefficient | -,150                      | ,141                 | ,069                | -,030                    | -,057                      | -,037            |
|                                 | Sig. (2-tailed)         | ,326                       | ,356                 | ,652                | ,845                     | ,712                       | ,807             |
|                                 | N                       | 45                         | 45                   | 45                  | 45                       | 45                         | 45               |
| Erysipelatoclostridium_change   | Correlation Coefficient | -,149                      | -,121                | ,019                | ,245                     | -,069                      | ,107             |
|                                 | Sig. (2-tailed)         | ,329                       | ,430                 | ,903                | ,104                     | ,652                       | ,484             |
|                                 | N                       | 45                         | 45                   | 45                  | 45                       | 45                         | 45               |
| Faecalitalea_change             | Correlation Coefficient | -,141                      | ,157                 | ,072                | -,043                    | ,036                       | ,126             |
|                                 | Sig. (2-tailed)         | ,355                       | ,303                 | ,638                | ,778                     | ,812                       | ,411             |
|                                 | N                       | 45                         | 45                   | 45                  | 45                       | 45                         | 45               |
| Family.XIII.AD3011_group_change | Correlation Coefficient | ,185                       | -,149                | -,323*              | ,035                     | -,104                      | -,224            |
|                                 | Sig. (2-tailed)         | ,224                       | ,330                 | ,031                | ,821                     | ,496                       | ,139             |
|                                 | N                       | 45                         | 45                   | 45                  | 45                       | 45                         | 45               |
| Family.XIII.UCG.001_change      | Correlation Coefficient | -,151                      | ,058                 | -,146               | ,222                     | ,128                       | ,120             |
|                                 | Sig. (2-tailed)         | ,322                       | ,705                 | ,337                | ,142                     | ,402                       | ,432             |
|                                 | N                       | 45                         | 45                   | 45                  | 45                       | 45                         | 45               |
| Gemella_change                  | Correlation Coefficient | ,304*                      | ,020                 | ,122                | ,093                     | ,253                       | -,094            |
|                                 | Sig. (2-tailed)         | ,043                       | ,899                 | ,424                | ,545                     | ,094                       | ,541             |
|                                 | N                       | 45                         | 45                   | 45                  | 45                       | 45                         | 45               |

## Correlations

|                                     |                         | Shuttleworthia_<br>change | Subdoligranulu<br>m_change | UCG.<br>003_change | Xi.Eubacterium..<br>brachy.<br>group_change | X.<br>Ruminococcus.<br>.gavvreauii.<br>group_change | X.<br>Ruminococcus.<br>.torques.<br>group_change |
|-------------------------------------|-------------------------|---------------------------|----------------------------|--------------------|---------------------------------------------|-----------------------------------------------------|--------------------------------------------------|
| Collinsella_change                  | Correlation Coefficient | ,092                      | ,025                       | -,109              | -,063                                       | ,005                                                | ,158                                             |
|                                     | Sig. (2-tailed)         | ,546                      | ,869                       | ,474               | ,682                                        | ,976                                                | ,300                                             |
|                                     | N                       | 45                        | 45                         | 45                 | 45                                          | 45                                                  | 45                                               |
| Desulfovibrio_change                | Correlation Coefficient | ,020                      | -,113                      | -,052              | ,100                                        | -,043                                               | -,151                                            |
|                                     | Sig. (2-tailed)         | ,894                      | ,462                       | ,735               | ,513                                        | ,778                                                | ,323                                             |
|                                     | N                       | 45                        | 45                         | 45                 | 45                                          | 45                                                  | 45                                               |
| Eggerthella_change                  | Correlation Coefficient | ,146                      | ,022                       | -,180              | ,125                                        | ,102                                                | -,038                                            |
|                                     | Sig. (2-tailed)         | ,338                      | ,886                       | ,237               | ,412                                        | ,505                                                | ,804                                             |
|                                     | N                       | 45                        | 45                         | 45                 | 45                                          | 45                                                  | 45                                               |
| Erysipelatoclostridium_cha<br>nge   | Correlation Coefficient | ,078                      | ,064                       | ,000               | ,156                                        | ,038                                                | ,060                                             |
|                                     | Sig. (2-tailed)         | ,613                      | ,676                       | ,999               | ,307                                        | ,803                                                | ,698                                             |
|                                     | N                       | 45                        | 45                         | 45                 | 45                                          | 45                                                  | 45                                               |
| Faecalitalea_change                 | Correlation Coefficient | -,141                     | ,039                       | -,038              | ,302*                                       | -,074                                               | ,190                                             |
|                                     | Sig. (2-tailed)         | ,356                      | ,801                       | ,804               | ,044                                        | ,629                                                | ,211                                             |
|                                     | N                       | 45                        | 45                         | 45                 | 45                                          | 45                                                  | 45                                               |
| Family.XIII.AD3011.<br>group_change | Correlation Coefficient | -,048                     | ,090                       | -,018              | -,084                                       | -,026                                               | ,281                                             |
|                                     | Sig. (2-tailed)         | ,752                      | ,555                       | ,905               | ,585                                        | ,867                                                | ,062                                             |
|                                     | N                       | 45                        | 45                         | 45                 | 45                                          | 45                                                  | 45                                               |
| Family.XIII.UCG.<br>001_change      | Correlation Coefficient | -,280                     | -,025                      | ,070               | ,068                                        | -,256                                               | ,041                                             |
|                                     | Sig. (2-tailed)         | ,062                      | ,872                       | ,645               | ,655                                        | ,089                                                | ,791                                             |
|                                     | N                       | 45                        | 45                         | 45                 | 45                                          | 45                                                  | 45                                               |
| Gemella_change                      | Correlation Coefficient | -,146                     | ,072                       | -,274              | ,233                                        | ,000                                                | ,082                                             |
|                                     | Sig. (2-tailed)         | ,339                      | ,636                       | ,069               | ,123                                        | ,998                                                | ,594                                             |
|                                     | N                       | 45                        | 45                         | 45                 | 45                                          | 45                                                  | 45                                               |

## Correlations

|                                          | interaction_VTA<br>_change                      | interaction_rOF<br>C_change | interaction_rmO<br>FC_change | sumscore_GIQ<br>LI_change | Stool_frequenc<br>y_change | STGHRE_chan<br>ge   |
|------------------------------------------|-------------------------------------------------|-----------------------------|------------------------------|---------------------------|----------------------------|---------------------|
| Gordonibacter_change                     | Correlation Coefficient<br>Sig. (2-tailed)<br>N | ,025<br>,876<br>43          | ,044<br>,785<br>40           | ,079<br>,614<br>43        | ,079<br>,610<br>44         | -,040<br>,803<br>42 |
| Holdemania_change                        | Correlation Coefficient<br>Sig. (2-tailed)<br>N | -,083<br>,597<br>43         | ,049<br>,764<br>40           | ,005<br>,972<br>43        | ,160<br>,301<br>44         | -,104<br>,514<br>42 |
| Holdemania_change                        | Correlation Coefficient<br>Sig. (2-tailed)<br>N | -,116<br>,459<br>43         | -,259<br>,107<br>40          | -,195<br>,211<br>43       | ,095<br>,539<br>44         | ,015<br>,927<br>42  |
| Lachnospiraceae.FCS020.<br>group_change  | Correlation Coefficient<br>Sig. (2-tailed)<br>N | -,041<br>,792<br>43         | -,079<br>,627<br>40          | ,028<br>,860<br>43        | ,133<br>,390<br>44         | -,078<br>,624<br>42 |
| Lachnospiraceae.<br>NK4A136.group_change | Correlation Coefficient<br>Sig. (2-tailed)<br>N | ,286<br>,063<br>43          | -,093<br>,566<br>40          | -,001<br>,996<br>43       | ,000<br>,998<br>44         | ,094<br>,554<br>42  |
| Lactiplantibacillus_change               | Correlation Coefficient<br>Sig. (2-tailed)<br>N | -,006<br>,972<br>43         | ,120<br>,459<br>40           | ,397**<br>,008<br>43      | ,168<br>,276<br>44         | ,131<br>,407<br>42  |
| Lactobacillus_change                     | Correlation Coefficient<br>Sig. (2-tailed)<br>N | -,023<br>,882<br>43         | ,046<br>,778<br>40           | -,054<br>,731<br>43       | -,033<br>,833<br>44        | -,070<br>,659<br>42 |
| Libanicoccus_change                      | Correlation Coefficient<br>Sig. (2-tailed)<br>N | ,294<br>,056<br>43          | ,211<br>,192<br>40           | ,223<br>,151<br>43        | -,057<br>,712<br>44        | -,107<br>,499<br>42 |

## Correlations

|                                          |                         | STPYY_change | STGLPT_chan<br>ge | age   | BMI   | FM_stand | Richness | shannon.<br>effective |
|------------------------------------------|-------------------------|--------------|-------------------|-------|-------|----------|----------|-----------------------|
| Gordonibacter_change                     | Correlation Coefficient | -,341*       | ,132              | ,239  | ,173  | ,090     | ,244     | ,257                  |
|                                          | Sig. (2-tailed)         | ,027         | ,404              | ,114  | ,257  | ,558     | ,107     | ,089                  |
|                                          | N                       | 42           | 42                | 45    | 45    | 45       | 45       | 45                    |
| Holdemania_change                        | Correlation Coefficient | -,043        | ,166              | -,098 | ,079  | ,056     | ,303*    | ,318*                 |
|                                          | Sig. (2-tailed)         | ,785         | ,294              | ,523  | ,606  | ,713     | ,043     | ,033                  |
|                                          | N                       | 42           | 42                | 45    | 45    | 45       | 45       | 45                    |
| Holdemania_change                        | Correlation Coefficient | -,157        | -,266             | ,177  | ,284  | ,017     | ,395**   | ,414**                |
|                                          | Sig. (2-tailed)         | ,321         | ,089              | ,245  | ,058  | ,911     | ,007     | ,005                  |
|                                          | N                       | 42           | 42                | 45    | 45    | 45       | 45       | 45                    |
| Lachnospiraceae.FCS020.<br>group_change  | Correlation Coefficient | ,076         | ,162              | -,187 | ,056  | -,044    | ,238     | ,193                  |
|                                          | Sig. (2-tailed)         | ,633         | ,307              | ,220  | ,713  | ,774     | ,115     | ,204                  |
|                                          | N                       | 42           | 42                | 45    | 45    | 45       | 45       | 45                    |
| Lachnospiraceae.<br>NK4A136.group_change | Correlation Coefficient | ,155         | -,079             | ,152  | ,109  | ,114     | ,177     | ,117                  |
|                                          | Sig. (2-tailed)         | ,326         | ,621              | ,319  | ,476  | ,454     | ,246     | ,443                  |
|                                          | N                       | 42           | 42                | 45    | 45    | 45       | 45       | 45                    |
| Lactiplantibacillus_change               | Correlation Coefficient | -,079        | -,186             | -,003 | -,024 | ,182     | -,214    | -,256                 |
|                                          | Sig. (2-tailed)         | ,618         | ,238              | ,986  | ,874  | ,231     | ,159     | ,090                  |
|                                          | N                       | 42           | 42                | 45    | 45    | 45       | 45       | 45                    |
| Lactobacillus_change                     | Correlation Coefficient | ,046         | -,181             | ,190  | -,043 | ,118     | -,278    | -,322*                |
|                                          | Sig. (2-tailed)         | ,771         | ,251              | ,212  | ,777  | ,440     | ,065     | ,031                  |
|                                          | N                       | 42           | 42                | 45    | 45    | 45       | 45       | 45                    |
| Libanicoccus_change                      | Correlation Coefficient | ,039         | ,115              | ,250  | ,042  | -,048    | ,110     | ,108                  |
|                                          | Sig. (2-tailed)         | ,807         | ,468              | ,098  | ,786  | ,753     | ,470     | ,481                  |
|                                          | N                       | 42           | 42                | 45    | 45    | 45       | 45       | 45                    |

## Correlations

|                                          |                         | simpson.<br>effective | Evenness | CHOL_change | LDL_change | shannon.<br>effective | Richness_change |
|------------------------------------------|-------------------------|-----------------------|----------|-------------|------------|-----------------------|-----------------|
| Gordonibacter_change                     | Correlation Coefficient | ,266                  | ,248     | ,192        | ,030       | ,213                  | ,319*           |
|                                          | Sig. (2-tailed)         | ,077                  | ,101     | ,205        | ,847       | ,160                  | ,033            |
|                                          | N                       | 45                    | 45       | 45          | 45         | 45                    | 45              |
| Holdemania_change                        | Correlation Coefficient | ,357*                 | ,092     | ,137        | ,119       | ,130                  | ,156            |
|                                          | Sig. (2-tailed)         | ,016                  | ,546     | ,369        | ,437       | ,395                  | ,305            |
|                                          | N                       | 45                    | 45       | 45          | 45         | 45                    | 45              |
| Holdemania_change                        | Correlation Coefficient | ,438**                | ,206     | -,201       | -,187      | ,129                  | ,157            |
|                                          | Sig. (2-tailed)         | ,003                  | ,175     | ,186        | ,219       | ,400                  | ,304            |
|                                          | N                       | 45                    | 45       | 45          | 45         | 45                    | 45              |
| Lachnospiraceae.FCS020.<br>group_change  | Correlation Coefficient | ,205                  | -,019    | ,182        | ,198       | ,090                  | ,105            |
|                                          | Sig. (2-tailed)         | ,178                  | ,903     | ,232        | ,193       | ,555                  | ,493            |
|                                          | N                       | 45                    | 45       | 45          | 45         | 45                    | 45              |
| Lachnospiraceae.<br>NK4A136.group_change | Correlation Coefficient | ,108                  | -,153    | ,013        | ,030       | ,325*                 | ,289            |
|                                          | Sig. (2-tailed)         | ,480                  | ,316     | ,933        | ,846       | ,029                  | ,055            |
|                                          | N                       | 45                    | 45       | 45          | 45         | 45                    | 45              |
| Lactiplantibacillus_change               | Correlation Coefficient | -,284                 | -,172    | -,052       | -,114      | -,116                 | -,049           |
|                                          | Sig. (2-tailed)         | ,059                  | ,258     | ,735        | ,455       | ,446                  | ,751            |
|                                          | N                       | 45                    | 45       | 45          | 45         | 45                    | 45              |
| Lactobacillus_change                     | Correlation Coefficient | -,340*                | -,226    | ,184        | ,255       | -,398**               | -,220           |
|                                          | Sig. (2-tailed)         | ,022                  | ,135     | ,225        | ,091       | ,007                  | ,147            |
|                                          | N                       | 45                    | 45       | 45          | 45         | 45                    | 45              |
| Libanicoccus_change                      | Correlation Coefficient | ,007                  | -,031    | -,032       | -,003      | -,164                 | -,170           |
|                                          | Sig. (2-tailed)         | ,963                  | ,837     | ,834        | ,986       | ,281                  | ,264            |
|                                          | N                       | 45                    | 45       | 45          | 45         | 45                    | 45              |

## Correlations

|                                      |                         | Evenness_change | Actinomyces_change | Aerostipes_change | Bifidobacterium_change | Blautia_change | Collinsella_change |
|--------------------------------------|-------------------------|-----------------|--------------------|-------------------|------------------------|----------------|--------------------|
| Gordonibacter_change                 | Correlation Coefficient | -,097           | ,141               | -,081             | -,351*                 | ,121           | -,052              |
|                                      | Sig. (2-tailed)         | ,527            | ,357               | ,595              | ,018                   | ,427           | ,737               |
|                                      | N                       | 45              | 45                 | 45                | 45                     | 45             | 45                 |
| Holdemania_change                    | Correlation Coefficient | -,017           | ,092               | ,068              | -,172                  | ,251           | ,071               |
|                                      | Sig. (2-tailed)         | ,911            | ,548               | ,657              | ,258                   | ,096           | ,644               |
|                                      | N                       | 45              | 45                 | 45                | 45                     | 45             | 45                 |
| Holdemania_change                    | Correlation Coefficient | ,045            | -,328*             | ,138              | -,160                  | -,244          | -,286              |
|                                      | Sig. (2-tailed)         | ,772            | ,028               | ,366              | ,294                   | ,106           | ,057               |
|                                      | N                       | 45              | 45                 | 45                | 45                     | 45             | 45                 |
| Lachnospiraceae.FCS020_group_change  | Correlation Coefficient | ,062            | ,082               | -,184             | -,103                  | ,216           | ,106               |
|                                      | Sig. (2-tailed)         | ,686            | ,592               | ,227              | ,499                   | ,154           | ,489               |
|                                      | N                       | 45              | 45                 | 45                | 45                     | 45             | 45                 |
| Lachnospiraceae.NK4A136.group_change | Correlation Coefficient | ,138            | -,158              | -,157             | -,370*                 | -,377*         | -,529**            |
|                                      | Sig. (2-tailed)         | ,365            | ,300               | ,302              | ,012                   | ,011           | ,000               |
|                                      | N                       | 45              | 45                 | 45                | 45                     | 45             | 45                 |
| Lactiplantibacillus_change           | Correlation Coefficient | -,240           | ,225               | -,043             | ,360*                  | ,258           | ,286               |
|                                      | Sig. (2-tailed)         | ,112            | ,137               | ,779              | ,015                   | ,087           | ,057               |
|                                      | N                       | 45              | 45                 | 45                | 45                     | 45             | 45                 |
| Lactobacillus_change                 | Correlation Coefficient | -,370*          | -,099              | -,033             | ,159                   | -,086          | -,006              |
|                                      | Sig. (2-tailed)         | ,012            | ,519               | ,828              | ,297                   | ,575           | ,969               |
|                                      | N                       | 45              | 45                 | 45                | 45                     | 45             | 45                 |
| Libanicoccus_change                  | Correlation Coefficient | ,053            | -,038              | ,071              | ,153                   | ,051           | ,077               |
|                                      | Sig. (2-tailed)         | ,732            | ,803               | ,643              | ,315                   | ,741           | ,614               |
|                                      | N                       | 45              | 45                 | 45                | 45                     | 45             | 45                 |

## Correlations

|                                          |                         | Desulfovibrio_c<br>hange | Eggerthella_ch<br>ange | Erysipelatoclost<br>ridium_change | Faecalitalea_ch<br>ange | Family.XIII.<br>AD3011.<br>group_change | Family.XIII.<br>UCG.<br>001_change |
|------------------------------------------|-------------------------|--------------------------|------------------------|-----------------------------------|-------------------------|-----------------------------------------|------------------------------------|
| Gordonibacter_change                     | Correlation Coefficient | -,078                    | ,384**                 | ,224                              | ,183                    | -,040                                   | -,023                              |
|                                          | Sig. (2-tailed)         | ,610                     | ,009                   | ,140                              | ,230                    | ,792                                    | ,879                               |
|                                          | N                       | 45                       | 45                     | 45                                | 45                      | 45                                      | 45                                 |
| Holdemania_change                        | Correlation Coefficient | -,030                    | ,098                   | ,088                              | ,085                    | ,227                                    | -,114                              |
|                                          | Sig. (2-tailed)         | ,845                     | ,521                   | ,566                              | ,581                    | ,134                                    | ,458                               |
|                                          | N                       | 45                       | 45                     | 45                                | 45                      | 45                                      | 45                                 |
| Holdemania_change                        | Correlation Coefficient | ,003                     | ,139                   | -,060                             | ,040                    | -,016                                   | ,170                               |
|                                          | Sig. (2-tailed)         | ,986                     | ,362                   | ,694                              | ,794                    | ,916                                    | ,263                               |
|                                          | N                       | 45                       | 45                     | 45                                | 45                      | 45                                      | 45                                 |
| Lachnospiraceae.FCS020.<br>group_change  | Correlation Coefficient | -,042                    | ,020                   | ,162                              | -,221                   | ,038                                    | ,064                               |
|                                          | Sig. (2-tailed)         | ,782                     | ,897                   | ,288                              | ,145                    | ,802                                    | ,676                               |
|                                          | N                       | 45                       | 45                     | 45                                | 45                      | 45                                      | 45                                 |
| Lachnospiraceae.<br>NK4A136.group_change | Correlation Coefficient | -,024                    | -,054                  | ,052                              | -,278                   | ,335*                                   | ,207                               |
|                                          | Sig. (2-tailed)         | ,873                     | ,727                   | ,736                              | ,064                    | ,024                                    | ,172                               |
|                                          | N                       | 45                       | 45                     | 45                                | 45                      | 45                                      | 45                                 |
| Lactiplantibacillus_change               | Correlation Coefficient | -,018                    | -,150                  | -,149                             | -,141                   | ,185                                    | -,151                              |
|                                          | Sig. (2-tailed)         | ,905                     | ,326                   | ,329                              | ,355                    | ,224                                    | ,322                               |
|                                          | N                       | 45                       | 45                     | 45                                | 45                      | 45                                      | 45                                 |
| Lactobacillus_change                     | Correlation Coefficient | ,201                     | ,141                   | -,121                             | ,157                    | -,149                                   | ,058                               |
|                                          | Sig. (2-tailed)         | ,186                     | ,356                   | ,430                              | ,303                    | ,330                                    | ,705                               |
|                                          | N                       | 45                       | 45                     | 45                                | 45                      | 45                                      | 45                                 |
| Libanicoccus_change                      | Correlation Coefficient | ,338*                    | ,069                   | ,019                              | ,072                    | -,323*                                  | -,146                              |
|                                          | Sig. (2-tailed)         | ,023                     | ,652                   | ,903                              | ,638                    | ,031                                    | ,337                               |
|                                          | N                       | 45                       | 45                     | 45                                | 45                      | 45                                      | 45                                 |



## Correlations

|                                          |                         | Gemella_chang<br>e | Gordonibacter_<br>change | Holdemania_<br>change | Holdemania_ch<br>ange | Lachnospiraceae.FCS020.<br>group_change | Lachnospiraceae.NK4A136.<br>group_change |
|------------------------------------------|-------------------------|--------------------|--------------------------|-----------------------|-----------------------|-----------------------------------------|------------------------------------------|
| Gordonibacter_change                     | Correlation Coefficient | ,128               | 1,000                    | ,166                  | ,164                  | -,040                                   | ,003                                     |
|                                          | Sig. (2-tailed)         | ,402               | .                        | ,275                  | ,283                  | ,792                                    | ,985                                     |
|                                          | N                       | 45                 | 45                       | 45                    | 45                    | 45                                      | 45                                       |
| Holdemania_change                        | Correlation Coefficient | ,330*              | ,166                     | 1,000                 | ,013                  | ,367*                                   | -,336*                                   |
|                                          | Sig. (2-tailed)         | ,027               | ,275                     | .                     | ,934                  | ,013                                    | ,024                                     |
|                                          | N                       | 45                 | 45                       | 45                    | 45                    | 45                                      | 45                                       |
| Holdemania_change                        | Correlation Coefficient | -,465**            | ,164                     | ,013                  | 1,000                 | -,172                                   | ,161                                     |
|                                          | Sig. (2-tailed)         | ,001               | ,283                     | ,934                  | .                     | ,257                                    | ,290                                     |
|                                          | N                       | 45                 | 45                       | 45                    | 45                    | 45                                      | 45                                       |
| Lachnospiraceae.FCS020.<br>group_change  | Correlation Coefficient | ,300*              | -,040                    | ,367*                 | -,172                 | 1,000                                   | -,205                                    |
|                                          | Sig. (2-tailed)         | ,045               | ,792                     | ,013                  | ,257                  | .                                       | ,177                                     |
|                                          | N                       | 45                 | 45                       | 45                    | 45                    | 45                                      | 45                                       |
| Lachnospiraceae.<br>NK4A136.group_change | Correlation Coefficient | -,431**            | ,003                     | -,336*                | ,161                  | -,205                                   | 1,000                                    |
|                                          | Sig. (2-tailed)         | ,003               | ,985                     | ,024                  | ,290                  | ,177                                    | .                                        |
|                                          | N                       | 45                 | 45                       | 45                    | 45                    | 45                                      | 45                                       |
| Lactiplantibacillus_change               | Correlation Coefficient | ,304*              | -,077                    | ,033                  | -,103                 | ,056                                    | -,185                                    |
|                                          | Sig. (2-tailed)         | ,043               | ,617                     | ,831                  | ,500                  | ,713                                    | ,225                                     |
|                                          | N                       | 45                 | 45                       | 45                    | 45                    | 45                                      | 45                                       |
| Lactobacillus_change                     | Correlation Coefficient | ,020               | -,064                    | -,100                 | -,023                 | -,047                                   | -,079                                    |
|                                          | Sig. (2-tailed)         | ,899               | ,677                     | ,515                  | ,879                  | ,757                                    | ,604                                     |
|                                          | N                       | 45                 | 45                       | 45                    | 45                    | 45                                      | 45                                       |
| Libanicoccus_change                      | Correlation Coefficient | ,122               | ,034                     | -,152                 | ,160                  | -,142                                   | -,229                                    |
|                                          | Sig. (2-tailed)         | ,424               | ,822                     | ,319                  | ,292                  | ,353                                    | ,130                                     |
|                                          | N                       | 45                 | 45                       | 45                    | 45                    | 45                                      | 45                                       |

## Correlations

|                                      |                         | Lactiplantibacillus_change | Lactobacillus_c_change | Libanicoccus_c_change | Ligilactobacillus_change | Limosilactobacillus_change | Roseburia_change |
|--------------------------------------|-------------------------|----------------------------|------------------------|-----------------------|--------------------------|----------------------------|------------------|
| Gordonibacter_change                 | Correlation Coefficient | -,077                      | -,064                  | ,034                  | -,110                    | ,153                       | -,032            |
|                                      | Sig. (2-tailed)         | ,617                       | ,677                   | ,822                  | ,471                     | ,316                       | ,834             |
|                                      | N                       | 45                         | 45                     | 45                    | 45                       | 45                         | 45               |
| Holdemania_change                    | Correlation Coefficient | ,033                       | -,100                  | -,152                 | -,017                    | ,005                       | -,121            |
|                                      | Sig. (2-tailed)         | ,831                       | ,515                   | ,319                  | ,914                     | ,972                       | ,429             |
|                                      | N                       | 45                         | 45                     | 45                    | 45                       | 45                         | 45               |
| Holdemania_change                    | Correlation Coefficient | -,103                      | -,023                  | ,160                  | ,046                     | ,031                       | ,134             |
|                                      | Sig. (2-tailed)         | ,500                       | ,879                   | ,292                  | ,766                     | ,841                       | ,379             |
|                                      | N                       | 45                         | 45                     | 45                    | 45                       | 45                         | 45               |
| Lachnospiraceae.FCS020.group_change  | Correlation Coefficient | ,056                       | -,047                  | -,142                 | ,232                     | -,109                      | -,294            |
|                                      | Sig. (2-tailed)         | ,713                       | ,757                   | ,353                  | ,125                     | ,478                       | ,050             |
|                                      | N                       | 45                         | 45                     | 45                    | 45                       | 45                         | 45               |
| Lachnospiraceae.NK4A136.group_change | Correlation Coefficient | -,185                      | -,079                  | -,229                 | -,276                    | -,141                      | ,128             |
|                                      | Sig. (2-tailed)         | ,225                       | ,604                   | ,130                  | ,066                     | ,355                       | ,401             |
|                                      | N                       | 45                         | 45                     | 45                    | 45                       | 45                         | 45               |
| Lactiplantibacillus_change           | Correlation Coefficient | 1,000                      | -,039                  | -,036                 | ,077                     | ,124                       | -,116            |
|                                      | Sig. (2-tailed)         | .                          | ,801                   | ,814                  | ,615                     | ,416                       | ,447             |
|                                      | N                       | 45                         | 45                     | 45                    | 45                       | 45                         | 45               |
| Lactobacillus_change                 | Correlation Coefficient | -,039                      | 1,000                  | ,186                  | ,068                     | ,364*                      | -,085            |
|                                      | Sig. (2-tailed)         | ,801                       | .                      | ,220                  | ,659                     | ,014                       | ,580             |
|                                      | N                       | 45                         | 45                     | 45                    | 45                       | 45                         | 45               |
| Libanicoccus_change                  | Correlation Coefficient | -,036                      | ,186                   | 1,000                 | -,038                    | ,060                       | -,058            |
|                                      | Sig. (2-tailed)         | ,814                       | ,220                   | .                     | ,806                     | ,696                       | ,705             |
|                                      | N                       | 45                         | 45                     | 45                    | 45                       | 45                         | 45               |

## Correlations

|                                          |                         | Shuttleworthia_<br>change | Subdoligranulu<br>m_change | UCG.<br>003_change | Xi.Eubacterium..<br>brachy.<br>group_change | X.<br>Ruminococcus.<br>.gauvreauii.<br>group_change | X.<br>Ruminococcus.<br>.torques.<br>group_change |
|------------------------------------------|-------------------------|---------------------------|----------------------------|--------------------|---------------------------------------------|-----------------------------------------------------|--------------------------------------------------|
| Gordonibacter_change                     | Correlation Coefficient | ,055                      | ,172                       | ,223               | ,415**                                      | -,214                                               | -,156                                            |
|                                          | Sig. (2-tailed)         | ,720                      | ,258                       | ,141               | ,005                                        | ,158                                                | ,305                                             |
|                                          | N                       | 45                        | 45                         | 45                 | 45                                          | 45                                                  | 45                                               |
| Holdemania_change                        | Correlation Coefficient | -,001                     | -,056                      | -,306*             | ,278                                        | -,057                                               | ,204                                             |
|                                          | Sig. (2-tailed)         | ,996                      | ,714                       | ,041               | ,064                                        | ,709                                                | ,179                                             |
|                                          | N                       | 45                        | 45                         | 45                 | 45                                          | 45                                                  | 45                                               |
| Holdemania_change                        | Correlation Coefficient | ,144                      | -,059                      | ,323*              | ,009                                        | -,214                                               | -,192                                            |
|                                          | Sig. (2-tailed)         | ,346                      | ,702                       | ,030               | ,953                                        | ,158                                                | ,206                                             |
|                                          | N                       | 45                        | 45                         | 45                 | 45                                          | 45                                                  | 45                                               |
| Lachnospiraceae.FCS020.<br>group_change  | Correlation Coefficient | -,029                     | ,214                       | -,251              | ,108                                        | -,127                                               | ,105                                             |
|                                          | Sig. (2-tailed)         | ,848                      | ,158                       | ,096               | ,478                                        | ,405                                                | ,493                                             |
|                                          | N                       | 45                        | 45                         | 45                 | 45                                          | 45                                                  | 45                                               |
| Lachnospiraceae.<br>NK4A136.group_change | Correlation Coefficient | ,009                      | -,050                      | ,227               | -,157                                       | ,083                                                | -,207                                            |
|                                          | Sig. (2-tailed)         | ,954                      | ,745                       | ,133               | ,303                                        | ,587                                                | ,173                                             |
|                                          | N                       | 45                        | 45                         | 45                 | 45                                          | 45                                                  | 45                                               |
| Lactiplantibacillus_change               | Correlation Coefficient | ,071                      | -,040                      | -,063              | -,026                                       | ,178                                                | -,047                                            |
|                                          | Sig. (2-tailed)         | ,645                      | ,795                       | ,680               | ,865                                        | ,241                                                | ,760                                             |
|                                          | N                       | 45                        | 45                         | 45                 | 45                                          | 45                                                  | 45                                               |
| Lactobacillus_change                     | Correlation Coefficient | ,103                      | -,337*                     | -,049              | -,032                                       | ,044                                                | -,111                                            |
|                                          | Sig. (2-tailed)         | ,502                      | ,024                       | ,748               | ,837                                        | ,773                                                | ,466                                             |
|                                          | N                       | 45                        | 45                         | 45                 | 45                                          | 45                                                  | 45                                               |
| Libanicoccus_change                      | Correlation Coefficient | -,018                     | -,245                      | ,026               | ,087                                        | -,159                                               | -,241                                            |
|                                          | Sig. (2-tailed)         | ,909                      | ,105                       | ,863               | ,568                                        | ,297                                                | ,110                                             |
|                                          | N                       | 45                        | 45                         | 45                 | 45                                          | 45                                                  | 45                                               |

## Correlations

|                                           | interaction_VTA<br>_change                      | interaction_rOF<br>C_change | interaction_rmO<br>FC_change | sumscore_GIQ<br>LI_change | Stool_frequenc<br>y_change | STGHRE_chan<br>ge   |
|-------------------------------------------|-------------------------------------------------|-----------------------------|------------------------------|---------------------------|----------------------------|---------------------|
| Ligilactobacillus_change                  | Correlation Coefficient<br>Sig. (2-tailed)<br>N | -,175<br>,521<br>43         | -,105<br>,603<br>43          | ,082<br>,727<br>44        | ,054<br>,703<br>43         | -,017<br>,914<br>42 |
| Limosilactobacillus_change                | Correlation Coefficient<br>Sig. (2-tailed)<br>N | -,010<br>,949<br>43         | -,005<br>,976<br>40          | -,070<br>,654<br>43       | ,058<br>,706<br>44         | -,196<br>,212<br>42 |
| Roseburia_change                          | Correlation Coefficient<br>Sig. (2-tailed)<br>N | ,137<br>,380<br>43          | ,146<br>,369<br>40           | -,011<br>,944<br>43       | ,025<br>,870<br>44         | -,209<br>,184<br>42 |
| Shuttleworthia_change                     | Correlation Coefficient<br>Sig. (2-tailed)<br>N | ,191<br>,220<br>43          | -,155<br>,338<br>40          | ,032<br>,838<br>43        | ,210<br>,172<br>44         | -,164<br>,300<br>42 |
| Subdoligranulum_change                    | Correlation Coefficient<br>Sig. (2-tailed)<br>N | -,384*<br>,011<br>43        | -,159<br>,329<br>40          | -,015<br>,922<br>43       | ,261<br>,087<br>44         | ,279<br>,073<br>42  |
| UCG.003_change                            | Correlation Coefficient<br>Sig. (2-tailed)<br>N | ,185<br>,236<br>43          | ,122<br>,453<br>40           | -,094<br>,551<br>43       | -,255<br>,095<br>44        | -,059<br>,711<br>42 |
| X.Eubacterium..brachy.<br>group_change    | Correlation Coefficient<br>Sig. (2-tailed)<br>N | ,115<br>,464<br>43          | -,177<br>,275<br>40          | ,038<br>,809<br>43        | ,090<br>,561<br>44         | -,097<br>,540<br>42 |
| X.Ruminococcus..<br>gavreaii.group_change | Correlation Coefficient<br>Sig. (2-tailed)<br>N | -,194<br>,211<br>43         | -,143<br>,377<br>40          | -,024<br>,879<br>43       | ,113<br>,465<br>44         | -,100<br>,528<br>42 |

## Correlations

|                                            |                         | STPYY_change | STGLPT_chan<br>ge | age   | BMI   | FM_stand | Richness | shannon.<br>effective |
|--------------------------------------------|-------------------------|--------------|-------------------|-------|-------|----------|----------|-----------------------|
| Ligilactobacillus_change                   | Correlation Coefficient | ,015         | ,038              | -,220 | ,072  | -,144    | -,045    | ,004                  |
|                                            | Sig. (2-tailed)         | ,924         | ,813              | ,146  | ,637  | ,345     | ,768     | ,979                  |
|                                            | N                       | 42           | 42                | 45    | 45    | 45       | 45       | 45                    |
| Limosilactobacillus_change                 | Correlation Coefficient | ,027         | -,182             | ,280  | -,257 | -,212    | -,141    | -,098                 |
|                                            | Sig. (2-tailed)         | ,864         | ,248              | ,062  | ,088  | ,162     | ,354     | ,523                  |
|                                            | N                       | 42           | 42                | 45    | 45    | 45       | 45       | 45                    |
| Roseburia_change                           | Correlation Coefficient | -,048        | -,035             | ,323* | -,120 | ,182     | ,123     | ,096                  |
|                                            | Sig. (2-tailed)         | ,763         | ,824              | ,030  | ,434  | ,232     | ,419     | ,532                  |
|                                            | N                       | 42           | 42                | 45    | 45    | 45       | 45       | 45                    |
| Shuttleworthia_change                      | Correlation Coefficient | -,068        | -,074             | -,034 | ,016  | ,312*    | -,034    | -,090                 |
|                                            | Sig. (2-tailed)         | ,669         | ,644              | ,825  | ,915  | ,037     | ,826     | ,556                  |
|                                            | N                       | 42           | 42                | 45    | 45    | 45       | 45       | 45                    |
| Subdoligranulum_change                     | Correlation Coefficient | -,210        | ,009              | -,033 | ,175  | -,188    | -,033    | ,008                  |
|                                            | Sig. (2-tailed)         | ,182         | ,957              | ,827  | ,252  | ,216     | ,831     | ,956                  |
|                                            | N                       | 42           | 42                | 45    | 45    | 45       | 45       | 45                    |
| UCG.003_change                             | Correlation Coefficient | -,176        | -,165             | ,072  | ,239  | ,208     | ,052     | ,083                  |
|                                            | Sig. (2-tailed)         | ,264         | ,296              | ,638  | ,113  | ,170     | ,736     | ,587                  |
|                                            | N                       | 42           | 42                | 45    | 45    | 45       | 45       | 45                    |
| X.Eubacterium..brachy.<br>group_change     | Correlation Coefficient | -,061        | ,179              | -,090 | -,048 | ,150     | ,244     | ,227                  |
|                                            | Sig. (2-tailed)         | ,702         | ,256              | ,554  | ,753  | ,324     | ,106     | ,133                  |
|                                            | N                       | 42           | 42                | 45    | 45    | 45       | 45       | 45                    |
| X.Ruminococcus..<br>gavreauii.group_change | Correlation Coefficient | -,063        | -,159             | ,071  | -,050 | ,196     | -,346*   | -,288                 |
|                                            | Sig. (2-tailed)         | ,693         | ,314              | ,642  | ,744  | ,196     | ,020     | ,055                  |
|                                            | N                       | 42           | 42                | 45    | 45    | 45       | 45       | 45                    |

## Correlations

|                                           |                         | simpson.<br>effective | Evenness | CHOL_change | LDL_change | shannon.<br>effective | Richness_chan<br>ge |
|-------------------------------------------|-------------------------|-----------------------|----------|-------------|------------|-----------------------|---------------------|
| Ligilactobacillus_change                  | Correlation Coefficient | ,017                  | ,145     | -,061       | ,011       | ,006                  | -,101               |
|                                           | Sig. (2-tailed)         | ,914                  | ,342     | ,689        | ,941       | ,969                  | ,508                |
|                                           | N                       | 45                    | 45       | 45          | 45         | 45                    | 45                  |
| Limosilactobacillus_change                | Correlation Coefficient | -,108                 | ,031     | -,076       | -,056      | ,038                  | ,025                |
|                                           | Sig. (2-tailed)         | ,480                  | ,839     | ,622        | ,713       | ,803                  | ,872                |
|                                           | N                       | 45                    | 45       | 45          | 45         | 45                    | 45                  |
| Roseburia_change                          | Correlation Coefficient | ,054                  | -,126    | ,028        | -,021      | ,107                  | ,211                |
|                                           | Sig. (2-tailed)         | ,726                  | ,409     | ,857        | ,893       | ,485                  | ,165                |
|                                           | N                       | 45                    | 45       | 45          | 45         | 45                    | 45                  |
| Shuttleworthia_change                     | Correlation Coefficient | -,080                 | -,186    | ,155        | ,231       | -,047                 | ,056                |
|                                           | Sig. (2-tailed)         | ,603                  | ,222     | ,308        | ,126       | ,758                  | ,717                |
|                                           | N                       | 45                    | 45       | 45          | 45         | 45                    | 45                  |
| Subdoligranulum_change                    | Correlation Coefficient | ,101                  | ,322*    | -,110       | -,104      | ,162                  | ,054                |
|                                           | Sig. (2-tailed)         | ,511                  | ,031     | ,473        | ,496       | ,288                  | ,722                |
|                                           | N                       | 45                    | 45       | 45          | 45         | 45                    | 45                  |
| UCG.003_change                            | Correlation Coefficient | ,035                  | ,030     | ,006        | -,018      | ,051                  | ,088                |
|                                           | Sig. (2-tailed)         | ,818                  | ,844     | ,971        | ,907       | ,738                  | ,567                |
|                                           | N                       | 45                    | 45       | 45          | 45         | 45                    | 45                  |
| X.Eubacterium..brachy.<br>group_change    | Correlation Coefficient | ,229                  | ,073     | ,000        | -,050      | ,281                  | ,364*               |
|                                           | Sig. (2-tailed)         | ,130                  | ,632     | 1,000       | ,745       | ,061                  | ,014                |
|                                           | N                       | 45                    | 45       | 45          | 45         | 45                    | 45                  |
| X.Ruminococcus..<br>gavreaii.group_change | Correlation Coefficient | -,249                 | ,176     | ,241        | ,241       | ,010                  | -,028               |
|                                           | Sig. (2-tailed)         | ,099                  | ,247     | ,110        | ,111       | ,950                  | ,854                |
|                                           | N                       | 45                    | 45       | 45          | 45         | 45                    | 45                  |

## Correlations

|                                           |                         | Evenness_chan<br>ge | Actinomyces_c<br>hange | Aerostipes_cha<br>nge | Bifidobacterium<br>_change | Blautia_change | Collinsella_cha<br>nge |
|-------------------------------------------|-------------------------|---------------------|------------------------|-----------------------|----------------------------|----------------|------------------------|
| Ligilactobacillus_change                  | Correlation Coefficient | ,320*               | ,003                   | -,024                 | ,072                       | ,133           | ,218                   |
|                                           | Sig. (2-tailed)         | ,032                | ,982                   | ,874                  | ,640                       | ,384           | ,150                   |
|                                           | N                       | 45                  | 45                     | 45                    | 45                         | 45             | 45                     |
| Limosilactobacillus_change                | Correlation Coefficient | -,008               | -,038                  | ,228                  | ,077                       | ,093           | ,132                   |
|                                           | Sig. (2-tailed)         | ,958                | ,806                   | ,132                  | ,616                       | ,542           | ,388                   |
|                                           | N                       | 45                  | 45                     | 45                    | 45                         | 45             | 45                     |
| Roseburia_change                          | Correlation Coefficient | -,188               | -,040                  | -,111                 | ,142                       | -,313*         | -,219                  |
|                                           | Sig. (2-tailed)         | ,216                | ,792                   | ,468                  | ,353                       | ,037           | ,149                   |
|                                           | N                       | 45                  | 45                     | 45                    | 45                         | 45             | 45                     |
| Shuttleworthia_change                     | Correlation Coefficient | -,228               | -,089                  | -,052                 | ,255                       | -,246          | ,092                   |
|                                           | Sig. (2-tailed)         | ,132                | ,561                   | ,735                  | ,091                       | ,104           | ,546                   |
|                                           | N                       | 45                  | 45                     | 45                    | 45                         | 45             | 45                     |
| Subdoligranulum_change                    | Correlation Coefficient | ,348*               | ,121                   | ,163                  | -,264                      | ,239           | ,025                   |
|                                           | Sig. (2-tailed)         | ,019                | ,428                   | ,285                  | ,079                       | ,114           | ,869                   |
|                                           | N                       | 45                  | 45                     | 45                    | 45                         | 45             | 45                     |
| UCG.003_change                            | Correlation Coefficient | -,141               | -,185                  | -,084                 | -,189                      | -,396**        | -,109                  |
|                                           | Sig. (2-tailed)         | ,357                | ,225                   | ,582                  | ,215                       | ,007           | ,474                   |
|                                           | N                       | 45                  | 45                     | 45                    | 45                         | 45             | 45                     |
| X.Eubacterium..brachy.<br>group_change    | Correlation Coefficient | -,061               | ,205                   | ,134                  | -,085                      | ,195           | -,063                  |
|                                           | Sig. (2-tailed)         | ,689                | ,178                   | ,381                  | ,580                       | ,199           | ,682                   |
|                                           | N                       | 45                  | 45                     | 45                    | 45                         | 45             | 45                     |
| X.Ruminococcus..<br>gavreaii.group_change | Correlation Coefficient | ,121                | ,018                   | -,190                 | ,233                       | ,209           | ,005                   |
|                                           | Sig. (2-tailed)         | ,428                | ,908                   | ,211                  | ,124                       | ,169           | ,976                   |
|                                           | N                       | 45                  | 45                     | 45                    | 45                         | 45             | 45                     |

## Correlations

|                                            |                         | Desulfovibrio_c<br>hange | Eggerthella_ch<br>ange | Erysipelatoclost<br>ridium_change | Faecalitalea_ch<br>ange | Family.XIII.<br>AD3011.<br>group_change | Family.XIII.<br>UCG.<br>001_change |
|--------------------------------------------|-------------------------|--------------------------|------------------------|-----------------------------------|-------------------------|-----------------------------------------|------------------------------------|
| Ligilactobacillus_change                   | Correlation Coefficient | -,054                    | -,030                  | ,245                              | -,043                   | ,035                                    | ,222                               |
|                                            | Sig. (2-tailed)         | ,725                     | ,845                   | ,104                              | ,778                    | ,821                                    | ,142                               |
|                                            | N                       | 45                       | 45                     | 45                                | 45                      | 45                                      | 45                                 |
| Limosilactobacillus_change                 | Correlation Coefficient | ,258                     | -,057                  | -,069                             | ,036                    | -,104                                   | ,128                               |
|                                            | Sig. (2-tailed)         | ,087                     | ,712                   | ,652                              | ,812                    | ,496                                    | ,402                               |
|                                            | N                       | 45                       | 45                     | 45                                | 45                      | 45                                      | 45                                 |
| Roseburia_change                           | Correlation Coefficient | ,130                     | -,037                  | ,107                              | ,126                    | -,224                                   | ,120                               |
|                                            | Sig. (2-tailed)         | ,393                     | ,807                   | ,484                              | ,411                    | ,139                                    | ,432                               |
|                                            | N                       | 45                       | 45                     | 45                                | 45                      | 45                                      | 45                                 |
| Shuttleworthia_change                      | Correlation Coefficient | ,020                     | ,146                   | ,078                              | -,141                   | -,048                                   | -,280                              |
|                                            | Sig. (2-tailed)         | ,894                     | ,338                   | ,613                              | ,356                    | ,752                                    | ,062                               |
|                                            | N                       | 45                       | 45                     | 45                                | 45                      | 45                                      | 45                                 |
| Subdoligranulum_change                     | Correlation Coefficient | -,113                    | ,022                   | ,064                              | ,039                    | ,090                                    | -,025                              |
|                                            | Sig. (2-tailed)         | ,462                     | ,886                   | ,676                              | ,801                    | ,555                                    | ,872                               |
|                                            | N                       | 45                       | 45                     | 45                                | 45                      | 45                                      | 45                                 |
| UCG.003_change                             | Correlation Coefficient | -,052                    | -,180                  | ,000                              | -,038                   | -,018                                   | ,070                               |
|                                            | Sig. (2-tailed)         | ,735                     | ,237                   | ,999                              | ,804                    | ,905                                    | ,645                               |
|                                            | N                       | 45                       | 45                     | 45                                | 45                      | 45                                      | 45                                 |
| X.Eubacterium..brachy.<br>group_change     | Correlation Coefficient | ,100                     | ,125                   | ,156                              | ,302*                   | -,084                                   | ,068                               |
|                                            | Sig. (2-tailed)         | ,513                     | ,412                   | ,307                              | ,044                    | ,585                                    | ,655                               |
|                                            | N                       | 45                       | 45                     | 45                                | 45                      | 45                                      | 45                                 |
| X.Ruminococcus..<br>gavreauii.group_change | Correlation Coefficient | -,043                    | ,102                   | ,038                              | -,074                   | -,026                                   | -,256                              |
|                                            | Sig. (2-tailed)         | ,778                     | ,505                   | ,803                              | ,629                    | ,867                                    | ,089                               |
|                                            | N                       | 45                       | 45                     | 45                                | 45                      | 45                                      | 45                                 |



## Correlations

|                                           |                         | Gemella_chang<br>e | Gordoniibacter_<br>change | Holdemanella_<br>change | Holdemania_ch<br>ange | Lachnospiracea<br>e.FCS020.<br>group_change | Lachnospiracea<br>e.NK4A136.<br>group_change |
|-------------------------------------------|-------------------------|--------------------|---------------------------|-------------------------|-----------------------|---------------------------------------------|----------------------------------------------|
| Ligilactobacillus_change                  | Correlation Coefficient | ,093               | -,110                     | -,017                   | ,046                  | ,232                                        | -,276                                        |
|                                           | Sig. (2-tailed)         | ,545               | ,471                      | ,914                    | ,766                  | ,125                                        | ,066                                         |
|                                           | N                       | 45                 | 45                        | 45                      | 45                    | 45                                          | 45                                           |
| Limosilactobacillus_change                | Correlation Coefficient | ,253               | ,153                      | ,005                    | ,031                  | -,109                                       | -,141                                        |
|                                           | Sig. (2-tailed)         | ,094               | ,316                      | ,972                    | ,841                  | ,478                                        | ,355                                         |
|                                           | N                       | 45                 | 45                        | 45                      | 45                    | 45                                          | 45                                           |
| Roseburia_change                          | Correlation Coefficient | -,094              | -,032                     | -,121                   | ,134                  | -,294                                       | ,128                                         |
|                                           | Sig. (2-tailed)         | ,541               | ,834                      | ,429                    | ,379                  | ,050                                        | ,401                                         |
|                                           | N                       | 45                 | 45                        | 45                      | 45                    | 45                                          | 45                                           |
| Shuttleworthia_change                     | Correlation Coefficient | -,146              | ,055                      | -,001                   | ,144                  | -,029                                       | ,009                                         |
|                                           | Sig. (2-tailed)         | ,339               | ,720                      | ,996                    | ,346                  | ,848                                        | ,954                                         |
|                                           | N                       | 45                 | 45                        | 45                      | 45                    | 45                                          | 45                                           |
| Subdoligranulum_change                    | Correlation Coefficient | ,072               | ,172                      | -,056                   | -,059                 | ,214                                        | -,050                                        |
|                                           | Sig. (2-tailed)         | ,636               | ,258                      | ,714                    | ,702                  | ,158                                        | ,745                                         |
|                                           | N                       | 45                 | 45                        | 45                      | 45                    | 45                                          | 45                                           |
| UCG.003_change                            | Correlation Coefficient | -,274              | ,223                      | -,306*                  | ,323*                 | -,251                                       | ,227                                         |
|                                           | Sig. (2-tailed)         | ,069               | ,141                      | ,041                    | ,030                  | ,096                                        | ,133                                         |
|                                           | N                       | 45                 | 45                        | 45                      | 45                    | 45                                          | 45                                           |
| X.Eubacterium..brachy.<br>group_change    | Correlation Coefficient | ,233               | ,415**                    | ,278                    | ,009                  | ,108                                        | -,157                                        |
|                                           | Sig. (2-tailed)         | ,123               | ,005                      | ,064                    | ,953                  | ,478                                        | ,303                                         |
|                                           | N                       | 45                 | 45                        | 45                      | 45                    | 45                                          | 45                                           |
| X.Ruminococcus..<br>gavreaii.group_change | Correlation Coefficient | ,000               | -,214                     | -,057                   | -,214                 | -,127                                       | ,083                                         |
|                                           | Sig. (2-tailed)         | ,998               | ,158                      | ,709                    | ,158                  | ,405                                        | ,587                                         |
|                                           | N                       | 45                 | 45                        | 45                      | 45                    | 45                                          | 45                                           |

## Correlations

|                                       |                         | Lactiplantibacillus_change | Lactobacillus_c_change | Libanicoccus_c_change | Ligilactobacillus_change | Limosilactobacillus_change | Roseburia_change |
|---------------------------------------|-------------------------|----------------------------|------------------------|-----------------------|--------------------------|----------------------------|------------------|
| Ligilactobacillus_change              | Correlation Coefficient | ,077                       | ,068                   | -,038                 | 1,000                    | ,039                       | -,232            |
|                                       | Sig. (2-tailed)         | ,615                       | ,659                   | ,806                  | .                        | ,799                       | ,125             |
|                                       | N                       | 45                         | 45                     | 45                    | 45                       | 45                         | 45               |
| Limosilactobacillus_change            | Correlation Coefficient | ,124                       | ,364*                  | ,060                  | ,039                     | 1,000                      | ,063             |
|                                       | Sig. (2-tailed)         | ,416                       | ,014                   | ,696                  | ,799                     | .                          | ,681             |
|                                       | N                       | 45                         | 45                     | 45                    | 45                       | 45                         | 45               |
| Roseburia_change                      | Correlation Coefficient | -,116                      | -,085                  | -,058                 | -,232                    | ,063                       | 1,000            |
|                                       | Sig. (2-tailed)         | ,447                       | ,580                   | ,705                  | ,125                     | ,681                       | .                |
|                                       | N                       | 45                         | 45                     | 45                    | 45                       | 45                         | 45               |
| Shuttleworthia_change                 | Correlation Coefficient | ,071                       | ,103                   | -,018                 | -,075                    | ,067                       | ,080             |
|                                       | Sig. (2-tailed)         | ,645                       | ,502                   | ,909                  | ,623                     | ,661                       | ,603             |
|                                       | N                       | 45                         | 45                     | 45                    | 45                       | 45                         | 45               |
| Subdoligranulum_change                | Correlation Coefficient | -,040                      | -,337*                 | -,245                 | ,258                     | -,188                      | -,247            |
|                                       | Sig. (2-tailed)         | ,795                       | ,024                   | ,105                  | ,088                     | ,217                       | ,102             |
|                                       | N                       | 45                         | 45                     | 45                    | 45                       | 45                         | 45               |
| UCG.003_change                        | Correlation Coefficient | -,063                      | -,049                  | ,026                  | -,174                    | -,070                      | ,239             |
|                                       | Sig. (2-tailed)         | ,680                       | ,748                   | ,863                  | ,253                     | ,648                       | ,114             |
|                                       | N                       | 45                         | 45                     | 45                    | 45                       | 45                         | 45               |
| X.Eubacterium..brachy.group_change    | Correlation Coefficient | -,026                      | -,032                  | ,087                  | -,023                    | ,038                       | -,006            |
|                                       | Sig. (2-tailed)         | ,865                       | ,837                   | ,568                  | ,880                     | ,803                       | ,967             |
|                                       | N                       | 45                         | 45                     | 45                    | 45                       | 45                         | 45               |
| X.Ruminococcus..gavreaii.group_change | Correlation Coefficient | ,178                       | ,044                   | -,159                 | ,026                     | -,040                      | ,033             |
|                                       | Sig. (2-tailed)         | ,241                       | ,773                   | ,297                  | ,864                     | ,794                       | ,831             |
|                                       | N                       | 45                         | 45                     | 45                    | 45                       | 45                         | 45               |

## Correlations

|                                             |                         | Shuttleworthia_<br>change | Subdoligranulu<br>m_change | UCG.<br>003_change | X.Eubacterium..<br>brachy.<br>group_change | X.<br>Ruminococcus.<br>.gauvreauii.<br>group_change | X.<br>Ruminococcus.<br>.torques.<br>group_change |
|---------------------------------------------|-------------------------|---------------------------|----------------------------|--------------------|--------------------------------------------|-----------------------------------------------------|--------------------------------------------------|
| Ligilactobacillus_change                    | Correlation Coefficient | -,075                     | ,258                       | -,174              | -,023                                      | ,026                                                | ,101                                             |
|                                             | Sig. (2-tailed)         | ,623                      | ,088                       | ,253               | ,880                                       | ,864                                                | ,511                                             |
|                                             | N                       | 45                        | 45                         | 45                 | 45                                         | 45                                                  | 45                                               |
| Limosilactobacillus_change                  | Correlation Coefficient | ,067                      | -,188                      | -,070              | ,038                                       | -,040                                               | -,198                                            |
|                                             | Sig. (2-tailed)         | ,661                      | ,217                       | ,648               | ,803                                       | ,794                                                | ,192                                             |
|                                             | N                       | 45                        | 45                         | 45                 | 45                                         | 45                                                  | 45                                               |
| Roseburia_change                            | Correlation Coefficient | ,080                      | -,247                      | ,239               | -,006                                      | ,033                                                | -,192                                            |
|                                             | Sig. (2-tailed)         | ,603                      | ,102                       | ,114               | ,967                                       | ,831                                                | ,205                                             |
|                                             | N                       | 45                        | 45                         | 45                 | 45                                         | 45                                                  | 45                                               |
| Shuttleworthia_change                       | Correlation Coefficient | 1,000                     | -,188                      | -,004              | ,083                                       | -,090                                               | -,069                                            |
|                                             | Sig. (2-tailed)         | .                         | ,215                       | ,980               | ,589                                       | ,554                                                | ,652                                             |
|                                             | N                       | 45                        | 45                         | 45                 | 45                                         | 45                                                  | 45                                               |
| Subdoligranulum_change                      | Correlation Coefficient | -,188                     | 1,000                      | -,157              | -,039                                      | ,286                                                | ,201                                             |
|                                             | Sig. (2-tailed)         | ,215                      | .                          | ,302               | ,797                                       | ,057                                                | ,185                                             |
|                                             | N                       | 45                        | 45                         | 45                 | 45                                         | 45                                                  | 45                                               |
| UCG.003_change                              | Correlation Coefficient | -,004                     | -,157                      | 1,000              | -,044                                      | -,265                                               | -,349*                                           |
|                                             | Sig. (2-tailed)         | ,980                      | ,302                       | .                  | ,774                                       | ,078                                                | ,019                                             |
|                                             | N                       | 45                        | 45                         | 45                 | 45                                         | 45                                                  | 45                                               |
| X.Eubacterium..brachy.<br>group_change      | Correlation Coefficient | ,083                      | -,039                      | -,044              | 1,000                                      | -,241                                               | ,086                                             |
|                                             | Sig. (2-tailed)         | ,589                      | ,797                       | ,774               | .                                          | ,111                                                | ,573                                             |
|                                             | N                       | 45                        | 45                         | 45                 | 45                                         | 45                                                  | 45                                               |
| X.Ruminococcus..<br>gauvreauii.group_change | Correlation Coefficient | -,090                     | ,286                       | -,265              | -,241                                      | 1,000                                               | -,016                                            |
|                                             | Sig. (2-tailed)         | ,554                      | ,057                       | ,078               | ,111                                       | .                                                   | ,915                                             |
|                                             | N                       | 45                        | 45                         | 45                 | 45                                         | 45                                                  | 45                                               |

### Correlations

|                                          | interaction_VTA<br>_change                 | interaction_rOF<br>C_change                | interaction_rmO<br>FC_change               | sumscore_GIQ<br>LI_change                  | Stool_frequenc<br>y_change                 | STGHRE_chan<br>ge                          |
|------------------------------------------|--------------------------------------------|--------------------------------------------|--------------------------------------------|--------------------------------------------|--------------------------------------------|--------------------------------------------|
| X.Ruminococcus..torques.<br>group_change | Correlation Coefficient<br>Sig. (2-tailed) | Correlation Coefficient<br>Sig. (2-tailed) | Correlation Coefficient<br>Sig. (2-tailed) | Correlation Coefficient<br>Sig. (2-tailed) | Correlation Coefficient<br>Sig. (2-tailed) | Correlation Coefficient<br>Sig. (2-tailed) |
|                                          | -.229<br>,140<br>43                        | -,194<br>,230<br>40                        | -,133<br>,397<br>43                        | ,305*<br>,044<br>44                        | ,271<br>,079<br>43                         | ,230<br>,144<br>42                         |
| N                                        |                                            |                                            |                                            |                                            |                                            |                                            |

### Correlations

|                                          | STPYY_change                               | STGLPT_chan<br>ge                          | age                                        | BMI                                        | FM_stand                                   | Richness                                   | shannon.<br>effective                      |
|------------------------------------------|--------------------------------------------|--------------------------------------------|--------------------------------------------|--------------------------------------------|--------------------------------------------|--------------------------------------------|--------------------------------------------|
| X.Ruminococcus..torques.<br>group_change | Correlation Coefficient<br>Sig. (2-tailed) | Correlation Coefficient<br>Sig. (2-tailed) | Correlation Coefficient<br>Sig. (2-tailed) | Correlation Coefficient<br>Sig. (2-tailed) | Correlation Coefficient<br>Sig. (2-tailed) | Correlation Coefficient<br>Sig. (2-tailed) | Correlation Coefficient<br>Sig. (2-tailed) |
|                                          | ,183<br>,247<br>42                         | ,092<br>,561<br>42                         | -,302*<br>,044<br>45                       | ,053<br>,728<br>45                         | ,019<br>,904<br>45                         | ,079<br>,607<br>45                         | ,122<br>,425<br>45                         |
| N                                        |                                            |                                            |                                            |                                            |                                            |                                            |                                            |

### Correlations

|                                          | simpson.<br>effective                      | Evenness                                   | CHOL_change                                | LDL_change                                 | shannon.<br>effective_chang<br>e           | Richness_chan<br>ge                        |
|------------------------------------------|--------------------------------------------|--------------------------------------------|--------------------------------------------|--------------------------------------------|--------------------------------------------|--------------------------------------------|
| X.Ruminococcus..torques.<br>group_change | Correlation Coefficient<br>Sig. (2-tailed) | Correlation Coefficient<br>Sig. (2-tailed) | Correlation Coefficient<br>Sig. (2-tailed) | Correlation Coefficient<br>Sig. (2-tailed) | Correlation Coefficient<br>Sig. (2-tailed) | Correlation Coefficient<br>Sig. (2-tailed) |
|                                          | ,163<br>,284<br>45                         | ,204<br>,179<br>45                         | -,067<br>,663<br>45                        | -,037<br>,812<br>45                        | ,083<br>,586<br>45                         | ,019<br>,904<br>45                         |
| N                                        |                                            |                                            |                                            |                                            |                                            |                                            |

### Correlations

|                                          | Evenness_change | Actinomyces_change | Aerostipes_change | Bifidobacterium_change | Blautia_change | Collinsella_change |
|------------------------------------------|-----------------|--------------------|-------------------|------------------------|----------------|--------------------|
| X.Ruminococcus..torques.<br>group_change | ,242            | ,286               | ,134              | -,128                  | ,288           | ,158               |
|                                          | ,109            | ,056               | ,380              | ,402                   | ,055           | ,300               |
| N                                        | 45              | 45                 | 45                | 45                     | 45             | 45                 |

### Correlations

|                                          | Desulfovibrio_change | Eggerthella_change | Erysipelatoclostridium_change | Faecalitalea_change | Family.XIII.AD3011_group_change | Family.XIII.UCG.001_group_change |
|------------------------------------------|----------------------|--------------------|-------------------------------|---------------------|---------------------------------|----------------------------------|
| X.Ruminococcus..torques.<br>group_change | -,151                | -,038              | ,060                          | ,190                | ,281                            | ,041                             |
|                                          | ,323                 | ,804               | ,698                          | ,211                | ,062                            | ,791                             |
| N                                        | 45                   | 45                 | 45                            | 45                  | 45                              | 45                               |

### Correlations

|                                          | Gemella_change | Gordonibacter_change | Holdemanella_change | Holdemanian_change | Lachnospiraceae.FCS020_group_change | Lachnospiraceae.NK4A136_group_change |
|------------------------------------------|----------------|----------------------|---------------------|--------------------|-------------------------------------|--------------------------------------|
| X.Ruminococcus..torques.<br>group_change | ,082           | -,156                | ,204                | -,192              | ,105                                | -,207                                |
|                                          | ,594           | ,305                 | ,179                | ,206               | ,493                                | ,173                                 |
| N                                        | 45             | 45                   | 45                  | 45                 | 45                                  | 45                                   |

### Correlations

|                                          | Lactiplantibacillus_change        | Lactobacillus_c_hange            | Libanicoccus_c_hange             | Ligilactobacillus_change        | Limosilactobacillus_change       | Roseburia_change                 |
|------------------------------------------|-----------------------------------|----------------------------------|----------------------------------|---------------------------------|----------------------------------|----------------------------------|
| X.Ruminococcus..torques.<br>group_change | Correlation Coefficient<br>-0,047 | Correlation Coefficient<br>-,111 | Correlation Coefficient<br>-,241 | Correlation Coefficient<br>,101 | Correlation Coefficient<br>-,198 | Correlation Coefficient<br>-,192 |
|                                          | Sig. (2-tailed)<br>,760           | Sig. (2-tailed)<br>,466          | Sig. (2-tailed)<br>,110          | Sig. (2-tailed)<br>,511         | Sig. (2-tailed)<br>,192          | Sig. (2-tailed)<br>,205          |
|                                          | N<br>45                           | N<br>45                          | N<br>45                          | N<br>45                         | N<br>45                          | N<br>45                          |

### Correlations

|                                          | Shuttleworthia_change            | Subdoligranulum_change          | UCG.003_change                    | X.Eubacterium..brachy.<br>group_change | X.Ruminococcus.gauvreauii.<br>group_change | X.Ruminococcus.torques.<br>group_change |
|------------------------------------------|----------------------------------|---------------------------------|-----------------------------------|----------------------------------------|--------------------------------------------|-----------------------------------------|
| X.Ruminococcus..torques.<br>group_change | Correlation Coefficient<br>-,069 | Correlation Coefficient<br>,201 | Correlation Coefficient<br>-,349* | Correlation Coefficient<br>,086        | Correlation Coefficient<br>-,016           | Correlation Coefficient<br>1,000        |
|                                          | Sig. (2-tailed)<br>,652          | Sig. (2-tailed)<br>,185         | Sig. (2-tailed)<br>,019           | Sig. (2-tailed)<br>,573                | Sig. (2-tailed)<br>,915                    | Sig. (2-tailed)<br>.                    |
|                                          | N<br>45                          | N<br>45                         | N<br>45                           | N<br>45                                | N<br>45                                    | N<br>45                                 |

\*. Correlation is significant at the 0.05 level (2-tailed).

\*\*. Correlation is significant at the 0.01 level (2-tailed).
